# Supplementary material for: Discrepancy between subjectively reported symptoms and objectively measured clinical findings in dry eye: a population based analysis
Source: PubMed Central journal article supplement — BMJ Open. 2014 Aug 28;4(8):e005296. doi: 10.1136/bmjopen-2014-005296 (PMC4156796; doi:10.1136/bmjopen-2014-005296), 2014-08-28
Supplement: bmjopen-2014-005296.draft_revisions.pdf [file bmjopen-2014-005296.draft_revisions.pdf]

# BMJ Open

## The discrepancy between subjective symptoms and clinical findings in dry eye syndrome: a population based analysis

|                                 |                                                                                                                                                                                                                                              |
|---------------------------------|----------------------------------------------------------------------------------------------------------------------------------------------------------------------------------------------------------------------------------------------|
| Journal:                        | <i>BMJ Open</i>                                                                                                                                                                                                                              |
| Manuscript ID:                  | bmjopen-2014-005296                                                                                                                                                                                                                          |
| Article Type:                   | Research                                                                                                                                                                                                                                     |
| Date Submitted by the Author:   | 19-Mar-2014                                                                                                                                                                                                                                  |
| Complete List of Authors:       | Hua, Rui<br>Yao, Kai; Yale University School of Medicine, Ophthalmology and Visual Science<br>Hu, Yuedong; First Hospital of China Medical University, Ophthalmology<br>Chen, Lei; First Hospital of China Medical University, Ophthalmology |
| <b>Primary Subject Heading</b>: | Ophthalmology                                                                                                                                                                                                                                |
| Secondary Subject Heading:      | Ophthalmology, Epidemiology, Patient-centred medicine                                                                                                                                                                                        |
| Keywords:                       | MEDICAL EDUCATION & TRAINING, EPIDEMIOLOGY, OPHTHALMOLOGY, Corneal and external diseases < OPHTHALMOLOGY                                                                                                                                     |
|                                 |                                                                                                                                                                                                                                              |

SCHOLARONE™  
Manuscripts

1  
2  
3  
4  
5  
6  
7  
8  
9  
10  
11  
12  
13  
14  
15  
16  
17  
18  
19  
20  
21  
22  
23  
24  
25  
26  
27  
28  
29  
30  
31  
32  
33  
34  
35  
36  
37  
38  
39  
40  
41  
42  
43  
44  
45  
46  
47  
48  
49  
50  
51  
52  
53  
54  
55  
56  
57  
58  
59  
60

1 **The discrepancy between subjective symptoms and clinical findings in dry eye syndrome: a**  
2 **population based analysis**

3 Rui Hua <sup>1</sup>, Kai Yao<sup>2</sup>, Yuedong Hu<sup>1</sup>, Lei Chen <sup>1,\*</sup>

4 1Department of Ophthalmology, First Hospital of China Medical University, Shenyang, China

5 2 Department of Ophthalmology and Visual Science, Yale University School of Medicine, New

6 Haven, Connecticut 06510

7 \* Corresponding author:

8 Lei Chen

9 Department of Ophthalmology

10 First Hospital of China Medical University,

11 No.155, Nanjingbei Street, Heping District

12 Shenyang, Liaoning Province, People's Republic of China

13 Phone: 0086-13840583355

14 Fax: 0086-24-83282630

15 Email: LeiChen51@126.com

16

17

18

19

20

21

22

23

24

1  
2  
3  
4  
5  
6  
7  
8  
9  
10  
11  
12  
13  
14  
15  
16  
17  
18  
19  
20  
21  
22  
23  
24  
25  
26  
27  
28  
29  
30  
31  
32  
33  
34  
35  
36  
37  
38  
39  
40  
41  
42  
43  
44  
45  
46  
47  
48  
49  
50  
51  
52  
53  
54  
55  
56  
57  
58  
59  
60

25 **Abstract**

26 **Objectives:** To investigate the discrepancy between symptoms and clinical findings and influencing  
27 factors in dry eye syndrome (DES).

28 **Setting:** The study was a population-based and cross-sectional study in northeast China performed,  
29 during Jul to Aug, 2007. It was carried out in two rural districts of Zhuanghe and Dawa, which were  
30 located about 377km and 177km from our hospital respectively.

31 **PARTICIPANTS:** A total of 2600 eligible residents from 1300 households were identified, and  
32 valid responses were obtained from 2262 residents with the mean age of 48 (12-88) years (926  
33 men and 1336 women; response rate, 87%).

34 **PRIMARY OUTCOME MEASURES:** All subjects received examinations of the amount of lacrimal  
35 secretion and tear film break up time (BUT) and completed a questionnaire survey about  
36 subjective symptoms.

37 **Results:** Of 2262 subjects, the discrepancy contained 960 subjects (42.44%) and there was a  
38 significant difference between the occurrence of symptoms and clinical findings ( $\chi^2=4.027$ ,  $p =$   
39  $0.045 < 0.05$ ). In addition, influencing factors included gender, smoking, environment and age.  
40 Moreover, the Schirmer I test and tear film BUT demonstrated remarkable difference among the  
41 group with neither symptoms nor clinical findings, the one with discrepancy, and the one with  
42 both DE symptoms and positive clinical findings.

43 **Conclusion:** DES is a multi-stage disease related to multi-factors. It is of great importance to put  
44 forward the pre-clinical phase concept and to screen in those outpatients with inducing factors,  
45 and future interventions should focus on the discrepancy patients.

46 **Keywords:** discrepancy; dry eye syndrome; subjective symptoms; Schirmer I test; breaking up  
47 time;

48 **Strengths and limitations of this study**

1  
2 49 This is the first report on the discrepancy between subjective symptoms and clinical findings in dry  
3  
4 50 eye syndrome on large Chinese sample.

5  
6 51 Large-scale and population-based dry eye epidemiologic studies on the discrepancy are limited in  
7  
8  
9 52 China.

10  
11 53 Our study supported the results of the Diagnostic Methodology Subcommittee that the  
12  
13 54 administration of a structured questionnaire to patients presenting to a clinic provides an  
14  
15 55 excellent opportunity for screening patients with potential dry eye disease.

16  
17 56 We did not test tears osmotic pressure in the diagnostic protocol, and did not analyze the BMI and  
18  
19  
20 57 myocardial infarction or angina risk factors.

21  
22 58 This study also lacked of the other objective tests evaluating ocular surface.

23  
24  
25 59

26  
27  
28 60

29  
30  
31 61

32  
33  
34 62

35  
36  
37 63

38  
39  
40 64

41  
42  
43 65

44  
45  
46 66

47  
48  
49 67

50  
51  
52 68

53  
54  
55 69

56  
57  
58 70

59  
60  
61 71

62  
63  
64 72

65  
66  
67 73

## 74 INTRODUCTION

75 Dry eye (DE) is a common disorder of tear film, including tear deficiency or excessive tear  
76 evaporation, which is harmful to the inter-palpebral ocular surface and always associated with  
77 symptoms of ocular discomforts<sup>[1]</sup>. Posa A et al<sup>[2]</sup> reported that the majority of those questioned  
78 DE outpatients were 40 years of age or older (88%), female (59%) and described a variety of  
79 subjective symptoms (65%) in Germany. Dietary supplementation with a combination of omega-3  
80 essential fatty acids and antioxidants was proved to be an effective treatment for dry eye  
81 symptoms.<sup>[3]</sup> At present, it is easy to be ignored in clinics and the concept has not been widely  
82 accepted in China as well. In addition to the primary auxiliary examinations including visual acuity,  
83 external examination, as well as slit-lamp biomicroscopy (Su Zhou SIX-SIX Technological  
84 Development Co. ,Ltd, China),<sup>[4]</sup> further diagnostic tests should be performed to assess ocular  
85 surface damage (staining with rose bengal, lissamine green, or fluorescein dye), tear film instability  
86 (tear breakup time (BUT) test), as well as aqueous tear flow (schirmer test).<sup>[5]</sup> It has been reported  
87 that DE symptoms as evaluated subjectively in a questionnaire occurred in about 21% of  
88 the adult population in China, and the authors also found that the depression was associated with  
89 DE, in particular when the symptoms occurred in an older population from Beijing recently<sup>[6,7]</sup>.  
90 Although there are so many population-based survey of such lesion,<sup>[8,9]</sup> large-scale and  
91 population-based dry eye epidemiologic studies on the discrepancy are limited in China. So we  
92 conducted an extensive survey to study the discrepancy between subjective symptoms and clinical  
93 findings and the influencing factors in dry eye syndrome (DES).

## 94 METHODS

95 The study was a population-based and cross-sectional study in northeast China performed, during  
96 Jul to Aug, 2007. It was carried out in two rural districts of Zhuanghe and Dawa, which were  
97 located about 377km and 177km from our hospital respectively. Especially, Zhuanghe (seaside)  
98 was near the Bohai Sea, but Dawa (backland) was not. The inhabitants mainly lived from farming.

1  
2 99 All people living in the communities were officially registered by name, gender, and age at the  
3  
4 100 local government's office, which ensured the boundaries of the communities and the size of the  
5  
6 101 population of each of the communities were known before the start of the study. Home visits  
7  
8 102 were performed according to the registration list, and all subjects were selected randomly,  
9  
10 103 confirmed by door-to-door visitation. A total of 2600 eligible residents from 1300 households were  
11  
12 104 identified, and valid responses were obtained from 2262 residents with the mean age of 48 (12-88)  
13  
14 105 years (926 men and 1336 women; response rate, 87%).The subjects who had clear ocular surface  
15  
16 106 disease history such as keratitis or conjunctivitis were excluded.

17  
18  
19  
20 107 All subjects were required to do a questionnaire survey and their amount of tear secretion and tear  
21  
22 108 film BUT were recorded. As we know, the measurement of tear hyperosmolarity could be regarded  
23  
24 109 as a "gold standard" for DES diagnosis<sup>[4]</sup> because it gives rise to the apoptosis of cells of the  
25  
26 110 conjunctiva and cornea, and triggers inflammatory cascades that contribute to further cell death,  
27  
28 111 including loss of mucin-producing goblet cells, which exacerbating tear film instability.<sup>[10]</sup> However  
29  
30 112 it is hard to carry on such an approach under the epidemiological investigation condition.  
31  
32 113 Alternatively, BUT is also considered as the best clinical test because it also measures this  
33  
34 114 mechanism mentioned above, which has good overall accuracy,<sup>[11]</sup> and appears to be more  
35  
36 115 repeatable (varies less from visit to visit) than many other diagnostic tests.<sup>[12]</sup> As a result, BUT is  
37  
38 116 more suitable for epidemiological investigation.

39  
40  
41  
42  
43  
44 117 We evaluated DES using the following 7 questions developed and validated by Gulati A et al.<sup>[6,13,14]</sup>  
45  
46 118 The survey emphasized on the related ocular discomforts, including awareness, tearing, burning,  
47  
48 119 blurring and fluctuating vision, irritation, foreign body sensation as well as tired eyes (Table 1). If  
49  
50 120 three of seven questions were positive for one person simultaneously, we referred this person as  
51  
52 121 symptoms positive. Additionally, smoking status was also recorded. These data were recorded by  
53  
54 122 two investigators (RH, YDH) together.

55  
56  
57  
58 123 BUT: To avoid any interference, the BUT was performed before other DES tests. Fluorescein filter  
59  
60

1  
2 124 paper (Tianjin Jingming New Technological Development Co., Ltd, China) was wetted and smeared  
3  
4 125 in low temporal side of bulbar conjunctiva. The subjects were advised to blink several times in  
5  
6 126 order to smear the 2% fluorescein on the surface of cornea evenly. Then, tear film stability was  
7  
8 127 measured by recording the interval between the last complete blink and the appearance of the  
9  
10 128 first random dry spot through cobalt blue filter of slit lamp. It is necessary to ensure the  
11  
12 129 standardization of the equipments and environmental condition.

13 130 Schirmer I test: To avoid ocular irritation to other examinations by the test strip, the Schirmer's test  
14  
15 131 was performed at the end. Tear secretion test filter paper (Tianjin Jingming New Technological  
16  
17 132 Development Co. ,Ltd, China) measuring 35mm in length with a bend at 5mm was used. One  
18  
19 133 minute after topical anesthesia (20ml:80mg, oxybuprocaine hydrochloride eye drops, santan,  
20  
21 134 Japan), the filter paper was placed at the junction of medial  $\frac{2}{3}$  and lateral  $\frac{1}{3}$  of the lower lid in  
22  
23 135 the fornix. In addition, the test was carried out in dim illumination and under standard conditions  
24  
25 136 of temperature and humidity. Then the length of wetting was recorded after 5min. After that, the  
26  
27 137 subjects were requested to keep their eyes open.

28  
29 138 The definition of positive clinical findings in our study were: schirmer I test was less than 10mm  
30  
31 139 per 5min and tear film BUT was less than 10s<sup>[15]</sup>.All the research and measurements adhered to  
32  
33 140 the tenets of the Declaration of Helsinki and the study was approved by the Medical Research  
34  
35 141 Ethics Committee of First Hospital of China Medical University. Written informed consent was  
36  
37 142 obtained from all participants.

38  
39 143 All analyses were performed by SPSS version 19.0. The data were expressed as the median  
40  
41 144 (min-max). Regression analysis was performed to adjust gender, age, smoking and geographical  
42  
43 145 region. The Pearson Chi-square test was used to assess the proportions for the two cohorts as well  
44  
45 146 as the influencing factors (gender and environment) in the subjects with positive clinical findings  
46  
47 147 statistically. The influencing factors (age) in those subjects and the difference in Schirmer I test and  
48  
49 148 BUT were analyzed by Kruskal - Wallis H test. A probability (p) value of less than 0.05 was  
50  
51  
52  
53  
54  
55  
56  
57  
58  
59  
60

1  
2 149 considered statistically significant.

3  
4 150 **RESULTS**

5  
6 151 Logistic showed that gender (OR = 2.059,  $p < 0.0001$ ), smoking (OR = 2.263,  $p < 0.0001$ ) and  
7  
8 152 geographical region (seaside and backland) (OR = 0.272,  $p < 0.0001$ ) were risk factors for DE  
9  
10 153 symptoms, other than age (OR = 1.400,  $p = 0.100 > 0.05$ ). Moreover, there was no relationship  
11  
12 154 between symptoms and clinical findings in this study (OR = 1.112,  $p = 0.495 > 0.05$ ).

13  
14  
15  
16 155 Not only that a total of 960 out of 2262 (42%) subjects had a discrepancy between symptoms and  
17  
18 156 exams, but that 302 of 552 subjects reporting no symptoms had clinical DES findings (55%) and 658  
19  
20 157 of 1770 reporting symptoms had no clinical findings (38%). There was a significant difference in the  
21  
22 158 proportions for the two cohorts ( $\chi^2=4.027$ ,  $p = 0.045 < 0.05$ ) (Table 2). Of the 1302 subjects with  
23  
24 159 both symptoms and clinical findings being positive, 1052 are positive and others are negative. The  
25  
26 160 sensitivity and specificity of subjects to symptoms were 77.70% and 27.53% respectively, while the  
27  
28 161 accuracy of subjects' perception to disease was 57.56%. In addition, positive predictive value and  
29  
30 162 likelihood ratio were 61.52%, 1.072, and negative ones were 45.29%, 0.810, correspondingly.

31  
32  
33 163 For the 1354 subjects with clinical findings being positive, 622 of 780 (87.12%) females had related  
34  
35 164 symptoms; while, 390 of 574 (89.51%) males had related symptoms. Compared with males,  
36  
37 165 females were more likely to show DE symptoms ( $\chi^2=12.193$ ,  $p < 0.0001$ ). At the same time, there  
38  
39 166 were 574 out of 820 (70.00%) subjects with symptoms living in the seaside. On the contrary, the  
40  
41 167 number of that in backland was 478 out of 534 (89.51%) subjects. Thus, subjects of backland took  
42  
43 168 a higher proportion than that of seaside ( $\chi^2=35.528$ ,  $p < 0.0001$ ). Moreover, age showed significant  
44  
45 169 difference on whether there was DE symptoms or not ( $Z=1.983$ ,  $P= 0.047 < 0.05$ ).

46  
47  
48 170 While the Schirmer I test and tear film BUT demonstrated remarkable difference between no  
49  
50 171 symptoms without clinical findings, the discrepancy, and DE symptoms with clinical findings  
51  
52 172 positive subjects (Schirmer I test:  $\chi^2=422.93$ ,  $p < 0.0001$ ; BUT:  $\chi^2=264.85$ ,  $p < 0.0001$ ) (Table 3).

53  
54  
55  
56  
57  
58 173 **DISCUSSION**



1  
2 174 DE or dysfunctional tear syndrome is one of the most frequent diagnoses in ophthalmology. Its risk  
3  
4 175 factors include age, sex (female gender), race, contact lens wear, environment with low humidity,  
5  
6 176 systemic medications, and autoimmune disorders<sup>[16]</sup>.  
7

8  
9 177 Tear film components are composed of meibomian lipids, ocular mucins and proteins, and its  
10  
11 178 stability can be assessed via a number of tools designed for clinical as well as research purposes,  
12  
13 179 including evaluation of tear break-up time and non-invasive break-time; topographic and  
14  
15 180 interferometric techniques; confocal microscopic methods; aberrometry; and visual function  
16  
17 181 tests<sup>[17]</sup>. In the present study, Schirmer I test and BUT were performed. It has been reported that  
18  
19 182 there was no close correlation between the eye symptoms and the accessory examinations of  
20  
21 183 Sjögren's syndrome patients, as found in this research that numbers of patients are insensitive to  
22  
23 184 the dry-eye symptoms with the discrepancy being 42.44%. With the positive and negative  
24  
25 185 likelihood ratio being 1.072 and 0.810 respectively (both close to 1), it is suggested that the  
26  
27 186 possibilities of evaluating the state from symptoms both correctly and wrongly are basically the  
28  
29 187 same with each other. It is indicated that the possibilities of evaluating the disease from symptoms  
30  
31 188 both correctly and wrongly are basically the same with each other.  
32  
33  
34  
35

36  
37 189 Similarly, as proved by Schein OD<sup>[18]</sup>, it was concluded that there existed distinguished difference  
38  
39 190 between the chief complaint of patients and the lab studies results. So it seemed difficult to  
40  
41 191 distinguish such lesions apparently. To our knowledge, there are several reasons for the  
42  
43 192 discrepancy between subjective symptoms and clinical findings, which seems so important to our  
44  
45 193 routine clinical work.  
46  
47

48  
49 194 First, there is gender difference. Chia EM et al insisted that women tend to show the dry-eye  
50  
51 195 symptoms, which may be related to the hormone level,<sup>[19]</sup> as the androgen pool of  
52  
53 196 non-autoimmune dry eye patients with Meibomian glands malfunctions(MGD) is significantly  
54  
55 197 depleted compared with that of non-MGD and control cases<sup>[20]</sup>. This supported our study.  
56  
57  
58  
59  
60

1  
2 198 Second, the environment plays an important role. Nichols JJ<sup>[21]</sup> reported that the dry-eye symptoms  
3  
4 199 were more likely to develop in patients with contact lens, compared to those with glasses, while  
5  
6 200 the normal visual counterparts seldom had any complaints. It is the decrease of the cornea  
7  
8 201 sensitivity that leads to the high morbidity of ocular surface disease in Sjögren's syndrome and the  
9  
10 202 decrease of the DE symptoms<sup>[22]</sup>. Uchino M et al<sup>[14]</sup> also found that using contact len was a  
11  
12 203 common DE risk factor in both genders. It was reported that corneal sensory afferents respond to  
13  
14 204 irritating and potentially damaging stimuli, as well as drying that occurs with evaporation of the  
15  
16 205 tear film. Furthermore, DE also can modify the properties of corneal afferents and affect their  
17  
18 206 capability to regulate secretion<sup>[23]</sup>.  
19  
20 207 In addition, DE in the workplace is associated with increasing use of screens and electronic devices  
21  
22 208 and environmental conditions in modern office designs and other environments. Also it is affected  
23  
24 209 by the occupational exposure to ionizing radiation, chemicals or atmospheric dust with increased  
25  
26 210 ocular dryness<sup>[24]</sup>. In addition, it is suggested that high precorneal relative humidity protects the  
27  
28 211 precorneal tear film against desiccation and airborne chemicals and reduces the development of  
29  
30 212 eye irritation by airborne sensory irritants<sup>[25]</sup>. Da Wa as a backland, has lower humidity in the  
31  
32 213 atmosphere, which leads to distinctive dry-eye symptoms.  
33  
34 214 Similar to Uchino M's study that ophthalmic findings revealed short BUT and corneal staining  
35  
36 215 accompanied by normal Schirmer test values, we also found the discrepancy between subjective  
37  
38 216 symptoms and clinical findings in DES<sup>[26]</sup>. In the subjects with clinical findings being positive, the  
39  
40 217 subjects with complaints of DE symptoms had less tear secretion volume and lower tear film  
41  
42 218 stability, which suggested the existence of a "latent stage". According to the severity of the  
43  
44 219 amount of tear secretion and tear film BUT, we tried to rank all subjects: 1. No symptoms without  
45  
46 220 clinical findings; 2. The discrepancy between DE symptoms and clinical findings; 3. DE symptoms  
47  
48 221 with clinical findings being positive. The rank may represent the lesions progression. Moreover, we  
49  
50 222 should pay more attention to the discrepancy stage (2), which are tended to be ignored.  
51  
52  
53  
54  
55  
56  
57  
58  
59  
60

1  
2 223 It was widely considered that the increase in age is closely related to the severity of the DE  
3  
4 224 symptoms. Recently, it has been reported that DE is prevalent among young to middle-aged  
5  
6 225 Japanese visual display terminal users. Increased risk for DED was noted in women aged over 30  
7  
8 226 years.<sup>[26]</sup> In this survey, we found that the age was not a risk factor for DE symptoms in all samples,  
9  
10 227 which may be due to the discrepancy, but there was a significant difference in the subjects with  
11  
12 228 clinical findings being positive.

13  
14  
15  
16 229 As therapy strategies, we need to treat both signs and symptoms of the discrepancy subjects.  
17  
18 230 Currently, artificial tear emulsion may be an effective way to treat the signs and symptoms of DE in  
19  
20 231 meibomian gland dysfunction (MGD) cases<sup>[27]</sup>. On the other hand, Barabino S et al<sup>[28]</sup> reported that  
21  
22 232 the combination of hyaluronic acid and tamarind seed polysaccharide also could improve the  
23  
24 233 symptoms of DE effectively.

25  
26  
27  
28 234 Even so, the study had some limitations. For example, we did not test tears osmotic pressure in  
29  
30 235 the diagnostic protocol, and did not analyze the BMI and myocardial infarction or angina risk  
31  
32 236 factors, as reported by Uchino M<sup>[26]</sup>. This study also lacked of the other objective tests evaluating  
33  
34 237 ocular surface. These will be improved in our future study.

35  
36  
37 238 Our study suggested that there were so many potential DES without any symptoms. The  
38  
39 239 occupations of the population in this study are mainly farmers, so we should pay more attention  
40  
41 240 to the special group. In addition, it is necessary to screen in those outpatients with inducing  
42  
43 241 factors, and future interventions should focus on the discrepancy patients. Similarly, the  
44  
45 242 Diagnostic Methodology Subcommittee also concluded that the administration of a structured  
46  
47 243 questionnaire to patients presenting to a clinic provides an excellent opportunity for screening  
48  
49 244 patients with potential dry eye disease.<sup>[11]</sup>

50  
51  
52  
53 245 In conclusion, DES is a multi-stage disease related to multi-factors, and influencing factors of DE  
54  
55 246 symptoms included gender, smoking, environment as well as age. It is of great importance to make  
56  
57  
58  
59  
60

1  
2 247 the progression of the disease clear, put forward the pre-clinical phase concept and recognize the  
3  
4 248 discrepancy, which may contribute to the prevention, diagnosis and treatment.

5  
6  
7 249 There is no financial Support and any conflict of interest for this study.

8  
9 250 **Acknowledgments**

10  
11 251 This work was supported in part by Dr Lei Liu, Dr Yizhou Sun and Dr Jun Chen in the follow-up in  
12  
13 252 Department of Ophthalmology, First Hospital of China Medical University.

14  
15  
16 253 **Authors' contributions**

17  
18 254 Study concept and design: LC and RH. Acquisition of data: RH and YDH. Analysis and interpretation  
19  
20 255 of data: RH YDH and LC. Drafting of the manuscript: RH and KY. Critical revision of the manuscript  
21  
22 256 for important intellectual content: LC. All authors read and approved the final manuscript.

23  
24  
25 257 **Competing Interests**

26  
27  
28 258 None

29  
30 259 **Data Sharing Statement**

31  
32 260 No additional data

33  
34 261

35  
36 262

37  
38 263

39  
40 264

41  
42 265

43  
44 266

45  
46 267

47  
48 268

49  
50 269

51  
52 270

53  
54 271

1  
2 272  
3  
4 273  
5  
6 274  
7  
8  
9 275  
10  
11 276  
12  
13 277  
14  
15 278  
16  
17 279  
18  
19 280  
20  
21 281  
22  
23 282  
24  
25 283  
26  
27 284  
28  
29 285  
30  
31 286  
32  
33 287  
34  
35 288  
36  
37 289  
38  
39 290  
40  
41 291  
42  
43 292  
44  
45 293  
46  
47 294  
48  
49 295  
50  
51 296  
52  
53  
54  
55  
56  
57  
58  
59  
60

## REFERENCES

- 1.Lemp MA. Report of the national eye institute / industry workshop on clinical trials in dry eyes  
CLAO J. 1995; 21(4):221-232.
- 2.Posa A, Sel S, Dietz R, Sander R, Bräuer L, Paulsen F. Updated Incidence of Dry Eye Syndrome in  
Germany. *Klin Monbl Augenheilkd.* 2014; 231(1):42-46.
3. Oleňik A. Effectiveness and tolerability of dietary supplementation with a combination of  
omega-3 polyunsaturated fatty acids and antioxidants in the treatment of dry eye symptoms:  
results of a prospective study. *Clin Ophthalmol.* 2014; 8:169-176.
4. Bron AJ. Diagnosis of dry eye. *Surv Ophthalmol.* 2001; 45 Suppl 2:S221-226.
5. Perry HD. Dry eye disease: pathophysiology, classification, and diagnosis. *Am J Manag Care.* 2008;  
14:S79-87.
6. Jie Y, Xu L, Wu YY, Jonas JB. Prevalence of dry eye among adult Chinese in the Beijing Eye Study.  
*Eye (Lond).* 2009; 23:688-693.
- 7.Labbé A, Wang YX, Jie Y, Baudouin C, Jonas JB, Xu L. Dry eye disease, dry eye symptoms and  
depression: the Beijing Eye Study. *Br J Ophthalmol.* 2013; 97(11):1399-1403.
8. Onwubiko SN, Eze BI, Udeh NN, Arinze OC, Onwasigwe EN, Umeh RE. Dry eye disease:  
Prevalence, distribution and determinants in a hospital-based population. *Cont Lens Anterior Eye.*  
2013; pii: S1367-0484(13)00279-8.
9. van Landingham SW, West SK, Akpek EK, Muñoz B, Ramulu PY. Impact of dry eye on reading in a  
population based sample of the elderly: the Salisbury Eye Evaluation. *Br J Ophthalmol.* 2013; doi:  
10.1136/bjophthalmol-2013-303518.

- 1  
2  
3 297 10. Baudouin C, Aragona P, Messmer EM, Tomlinson A, Calonge M, Boboridis KG, Akova YA,  
4  
5 298 Geerling G, Labetoulle M, Rolando M. Role of hyperosmolarity in the pathogenesis and  
6  
7 299 management of dry eye disease: proceedings of the OCEAN group meeting. *Ocul Surf*. 2013;  
8  
9 300 11(4):246-258.
- 11 301 11. Bron, AJ . Methodologies to diagnose and monitor dry eye disease: report of the Diagnostic  
12  
13 302 Methodology Subcommittee of the International Dry Eye WorkShop (2007). 2007; *Ocul Surf*  
14  
15 303 5(2):108-152.
- 17 304 12. Nichols KK, Mitchell GL, Zadnik K. The repeatability of clinical measurements of dry eye.  
18  
19 305 *Cornea*.2004; 23: 272-285.
- 21 306 13. Gulati A, Sullivan R, Buring JE, Sullivan DA, Dana R, Schaumberg DA. Validation and  
22  
23 307 repeatability of a short questionnaire for dry eye syndrome. *Am J Ophthalmol*. 2006; 142:125–131.
- 25 308 14. Uchino M, Nishiwaki Y, Michikawa T, Shirakawa K, Kuwahara E, Yamada M, Dogru M,  
26  
27 309 Schaumberg DA, Kawakita T, Takebayashi T, Tsubota K. Prevalence and risk factors of dry eye  
28  
29 310 disease in Japan: Koumi study. *Ophthalmology*.2011; 118:2361-2367.
- 31 311 15. Zhang Mei, Chen Jiaqi, Liu Zhuguo. The diagnosis of dye eye syndrome. *Chinese Journal of*  
32  
33 312 *Practical Ophthalmology*. 2000; 18: 664-668.
- 35 313 16. Kaštelan S, Tomić M, Salopek-Rabatić J, Novak B. Diagnostic Procedures and Management of Dry  
36  
37 314 Eye. *Biomed Res Int* 2013:309723.
- 39 315 17. Sweeney DF, Millar TJ, Raju SR. Tear film stability: A review. *Exp Eye Res*. 2013; 117:28-38..
- 41 316 18. Schein OD, Tielsch JM, Muñoz B, Bandeen-Roche K, West S. Relation between signs and  
42  
43 317 symptoms of dry eye in the elderly. A population-based perspective. *Ophthalmology*.1997;  
44  
45 318 104:1395-1401.
- 47 319 19. Chia EM, Mitchell P, Rochtchina E, Lee AJ, Maroun R, Wang JJ. Prevalence and associations of  
48  
49 320 dry eye syndrome in an older population: the Blue Mountains Eye Study. *Clin Experiment*

- 1  
2 321 Ophthalmol. 2003; 31:229-232  
3  
4 322 20. Tamer C, Oksuz H, Sogut S. Androgen status of the nonautoimmune dry eye subtypes.  
5  
6 323 Ophthalmic Res. 2006; 38:280-286.  
7  
8  
9 324 21. Nichols JJ, Ziegler C, Mitchell GL, Nichols KK. Self-reported dry eye disease across refractive  
10  
11 325 modalities : Invest Ophthalmol Vis Sci. 2005; 46:1911-1914  
12  
13 326 22. Adatia FA, Michaeli-Cohen A, Naor J, Caffery B, Bookman A, Slomovic A. Correlation between  
14  
15 327 corneal sensitivity, subjective dry eye symptoms and corneal staining in Sjögren's syndrome. Can J  
16  
17 328 Ophthalmol. 2004; 39:767-771.  
18  
19  
20 329 23. Meng ID, Kurose M. The role of corneal afferent neurons in regulating tears under normal and  
21  
22 330 dry eye conditions. Exp Eye Res.2013; 117:79-87.  
23  
24  
25 331 24.Vicente-Herrero MT, Ramírez-Iñiguez de la Torre MV, Terradillos-García MJ, López González AA.  
26  
27 332 Dry eye syndrome. Occupational risk factors, valuation and prevention. Semergen. 2013; pii:  
28  
29 333 S1138-3593(13)00126-3.  
30  
31  
32 334 25. Wolkoff P, Nøjgaard JK, Franck C, Skov PG. Does the modern office environment desiccate the  
33  
34 335 eyes? Ugeskr Laeger. 2006; 168:3893-3896.  
35  
36  
37 336 26. Uchino M, Yokoi N, Uchino Y, Dogru M, Kawashima M, Komuro A, Sonomura Y, Kato H, Kinoshita  
38  
39 337 S, Schaumberg DA, Tsubota K. Prevalence of Dry Eye Disease and its Risk Factors in Visual Display  
40  
41 338 Terminal Users: The Osaka Study. Am J Ophthalmol.2013; 156(4):759-766.  
42  
43  
44 339 27.Sindt CW, Foulks GN. Efficacy of an artificial tear emulsion in patients with dry eye associated  
45  
46 340 with meibomian gland dysfunction. Clin Ophthalmol. 2013; 7:1713-1722.  
47  
48  
49 341 28. Barabino S, Rolando M, Nardi M, Bonini S, Aragona P, Traverso CE. The effect of an artificial tear  
50  
51 342 combining hyaluronic acid and tamarind seeds polysaccharide in patients with moderate dry eye  
52  
53 343 syndrome: a new treatment for dry eye. Eur J Ophthalmol. 2013; 20;24(2):173-178.  
54  
55  
56 344  
57  
58 345  
59  
60

1  
2 346  
3  
4 347  
5  
6 348  
7  
8  
9 349  
10  
11  
12  
13  
14  
15  
16  
17  
18  
19  
20  
21  
22  
23  
24  
25  
26 350  
27  
28 351  
29  
30 352  
31  
32 353  
33  
34 354  
35  
36 355  
37  
38 356  
39  
40 357  
41  
42 358  
43  
44 359  
45  
46 360  
47  
48 361  
49  
50 362  
51  
52 363  
53  
54 364  
55  
56 365  
57  
58 366  
59  
60

**Table 1 Dry eye questionnaire for this survey**

- 
1. Do your eyes ever feel dry?

---

  2. Do your eyes ever have tearing?

---

  3. Do your eyes ever feel burning?

---

  4. Do your eyes ever have blurring and fluctuating vision?

---

  5. Do your eyes ever feel irritation?

---

  6. Do your eyes ever feel foreign body sensation?

---

  7. Do your eyes ever feel tired?

---

Possible answers to the questions were 'none or rarely', 'sometimes', and 'often or all the time'. The positive symptoms was defined as having 'sometimes' or 'often or all the time'.



1 367

2 368

3 369

4 370 **Table 2 Discrepancy between symptoms and clinical findings**

|          |        | Clinical findings |        |       |
|----------|--------|-------------------|--------|-------|
|          |        | DE                | normal | total |
| Symptoms | DE     | 1052              | 658    | 1710  |
|          | normal | 302               | 250    | 552   |
|          | Total  | 1354              | 908    | 2262  |

5 371

6 372

7 373

8 374

9 375

10 376

11 377

12 378

13 379

14 380

15 381

16 382

17 383

18 384

19 385

20 386

21 387

22 388

23 389

24 390

1  
2  
3  
4  
5  
6  
7  
8  
9  
10  
11  
12  
13  
14  
15  
16  
17  
18  
19  
20  
21  
22  
23  
24  
25  
26  
27  
28  
29  
30  
31  
32  
33  
34  
35  
36  
37  
38  
39  
40  
41  
42  
43  
44  
45  
46  
47  
48  
49  
50  
51  
52  
53  
54  
55  
56  
57  
58  
59  
60

390  
391  
392  
393  
394  
395

**Table 3 Comparison of Schirmer I test and tear film break up time**

| Symptoms    | Clinical findings | Schirmer I test (mm) | BUT (s)         |
|-------------|-------------------|----------------------|-----------------|
| Normal      | Normal            | 22.0 (2.0-30.0)      | 12.5 (0.0-30.0) |
| Discrepancy |                   | 15.0 (0.0-30.0)      | 9.0 (0.0-30.0)  |
| DE          | DE                | 5.0 (0.0-30.0)       | 4.0 (0.0-20.0)  |

For peer review only

## STROBE Statement—checklist of items that should be included in reports of observational studies

|                              | Item No | Recommendation                                                                                                                                                                                                                                                                                                                                                                                                                                                                                                                                                                                                                                                                                   |
|------------------------------|---------|--------------------------------------------------------------------------------------------------------------------------------------------------------------------------------------------------------------------------------------------------------------------------------------------------------------------------------------------------------------------------------------------------------------------------------------------------------------------------------------------------------------------------------------------------------------------------------------------------------------------------------------------------------------------------------------------------|
| <b>Title and abstract</b>    | √ 1     | (a) Indicate the study's design with a commonly used term in the title or the abstract<br>(b) Provide in the abstract an informative and balanced summary of what was done and what was found                                                                                                                                                                                                                                                                                                                                                                                                                                                                                                    |
| <b>Introduction</b>          |         |                                                                                                                                                                                                                                                                                                                                                                                                                                                                                                                                                                                                                                                                                                  |
| Background/rationale         | √ 2     | Explain the scientific background and rationale for the investigation being reported                                                                                                                                                                                                                                                                                                                                                                                                                                                                                                                                                                                                             |
| Objectives                   | √ 3     | State specific objectives, including any prespecified hypotheses                                                                                                                                                                                                                                                                                                                                                                                                                                                                                                                                                                                                                                 |
| <b>Methods</b>               |         |                                                                                                                                                                                                                                                                                                                                                                                                                                                                                                                                                                                                                                                                                                  |
| Study design                 | √ 4     | Present key elements of study design early in the paper                                                                                                                                                                                                                                                                                                                                                                                                                                                                                                                                                                                                                                          |
| Setting                      | √ 5     | Describe the setting, locations, and relevant dates, including periods of recruitment, exposure, follow-up, and data collection                                                                                                                                                                                                                                                                                                                                                                                                                                                                                                                                                                  |
| Participants                 | √ 6     | (a) <i>Cohort study</i> —Give the eligibility criteria, and the sources and methods of selection of participants. Describe methods of follow-up<br><i>Case-control study</i> —Give the eligibility criteria, and the sources and methods of case ascertainment and control selection. Give the rationale for the choice of cases and controls<br><i>Cross-sectional study</i> —Give the eligibility criteria, and the sources and methods of selection of participants<br>(b) <i>Cohort study</i> —For matched studies, give matching criteria and number of exposed and unexposed<br><i>Case-control study</i> —For matched studies, give matching criteria and the number of controls per case |
| Variables                    | √ 7     | Clearly define all outcomes, exposures, predictors, potential confounders, and effect modifiers. Give diagnostic criteria, if applicable                                                                                                                                                                                                                                                                                                                                                                                                                                                                                                                                                         |
| Data sources/<br>measurement | √ 8*    | For each variable of interest, give sources of data and details of methods of assessment (measurement). Describe comparability of assessment methods if there is more than one group                                                                                                                                                                                                                                                                                                                                                                                                                                                                                                             |
| Bias                         | √ 9     | Describe any efforts to address potential sources of bias                                                                                                                                                                                                                                                                                                                                                                                                                                                                                                                                                                                                                                        |
| Study size                   | √ 10    | Explain how the study size was arrived at                                                                                                                                                                                                                                                                                                                                                                                                                                                                                                                                                                                                                                                        |
| Quantitative variables       | √ 11    | Explain how quantitative variables were handled in the analyses. If applicable, describe which groupings were chosen and why                                                                                                                                                                                                                                                                                                                                                                                                                                                                                                                                                                     |
| Statistical methods          | √ 12    | (a) Describe all statistical methods, including those used to control for confounding<br>(b) Describe any methods used to examine subgroups and interactions<br>(c) Explain how missing data were addressed<br>(d) <i>Cohort study</i> —If applicable, explain how loss to follow-up was addressed<br><i>Case-control study</i> —If applicable, explain how matching of cases and controls was addressed<br><i>Cross-sectional study</i> —If applicable, describe analytical methods taking account of sampling strategy<br>(e) Describe any sensitivity analyses                                                                                                                                |

Continued on next page

| <b>Results</b>           |          |                                                                                                                                                                                                                                                                                                                                                                                                               |
|--------------------------|----------|---------------------------------------------------------------------------------------------------------------------------------------------------------------------------------------------------------------------------------------------------------------------------------------------------------------------------------------------------------------------------------------------------------------|
| Participants             | √<br>13* | (a) Report numbers of individuals at each stage of study—eg numbers potentially eligible, examined for eligibility, confirmed eligible, included in the study, completing follow-up, and analysed<br>(b) Give reasons for non-participation at each stage<br>(c) Consider use of a flow diagram                                                                                                               |
| Descriptive data         | √<br>14* | (a) Give characteristics of study participants (eg demographic, clinical, social) and information on exposures and potential confounders<br>(b) Indicate number of participants with missing data for each variable of interest<br>(c) <i>Cohort study</i> —Summarise follow-up time (eg, average and total amount)                                                                                           |
| Outcome data             | √<br>15* | <i>Cohort study</i> —Report numbers of outcome events or summary measures over time<br><i>Case-control study</i> —Report numbers in each exposure category, or summary measures of exposure<br><i>Cross-sectional study</i> —Report numbers of outcome events or summary measures                                                                                                                             |
| Main results             | √<br>16  | (a) Give unadjusted estimates and, if applicable, confounder-adjusted estimates and their precision (eg, 95% confidence interval). Make clear which confounders were adjusted for and why they were included<br>(b) Report category boundaries when continuous variables were categorized<br>(c) If relevant, consider translating estimates of relative risk into absolute risk for a meaningful time period |
| Other analyses           | √<br>17  | Report other analyses done—eg analyses of subgroups and interactions, and sensitivity analyses                                                                                                                                                                                                                                                                                                                |
| <b>Discussion</b>        |          |                                                                                                                                                                                                                                                                                                                                                                                                               |
| Key results              | √<br>18  | Summarise key results with reference to study objectives                                                                                                                                                                                                                                                                                                                                                      |
| Limitations              | √<br>19  | Discuss limitations of the study, taking into account sources of potential bias or imprecision. Discuss both direction and magnitude of any potential bias                                                                                                                                                                                                                                                    |
| Interpretation           | √<br>20  | Give a cautious overall interpretation of results considering objectives, limitations, multiplicity of analyses, results from similar studies, and other relevant evidence                                                                                                                                                                                                                                    |
| Generalisability         | √<br>21  | Discuss the generalisability (external validity) of the study results                                                                                                                                                                                                                                                                                                                                         |
| <b>Other information</b> |          |                                                                                                                                                                                                                                                                                                                                                                                                               |
| Funding                  | √<br>22  | Give the source of funding and the role of the funders for the present study and, if applicable, for the original study on which the present article is based                                                                                                                                                                                                                                                 |

\*Give information separately for cases and controls in case-control studies and, if applicable, for exposed and unexposed groups in cohort and cross-sectional studies.

**Note:** An Explanation and Elaboration article discusses each checklist item and gives methodological background and published examples of transparent reporting. The STROBE checklist is best used in conjunction with this article (freely available on the Web sites of PLoS Medicine at <http://www.plosmedicine.org/>, Annals of Internal Medicine at <http://www.annals.org/>, and Epidemiology at <http://www.epidem.com/>). Information on the STROBE Initiative is available at [www.strobe-statement.org](http://www.strobe-statement.org).

# BMJ Open

## The discrepancy between subjective symptoms and clinical findings in dry eye syndrome: a population based analysis

|                                 |                                                                                                                                                                                                                                              |
|---------------------------------|----------------------------------------------------------------------------------------------------------------------------------------------------------------------------------------------------------------------------------------------|
| Journal:                        | <i>BMJ Open</i>                                                                                                                                                                                                                              |
| Manuscript ID:                  | bmjopen-2014-005296.R1                                                                                                                                                                                                                       |
| Article Type:                   | Research                                                                                                                                                                                                                                     |
| Date Submitted by the Author:   | 18-Jun-2014                                                                                                                                                                                                                                  |
| Complete List of Authors:       | Hua, Rui<br>Yao, Kai; Yale University School of Medicine, Ophthalmology and Visual Science<br>Hu, Yuedong; First Hospital of China Medical University, Ophthalmology<br>Chen, Lei; First Hospital of China Medical University, Ophthalmology |
| <b>Primary Subject Heading</b>: | Ophthalmology                                                                                                                                                                                                                                |
| Secondary Subject Heading:      | Ophthalmology, Epidemiology, Patient-centred medicine                                                                                                                                                                                        |
| Keywords:                       | MEDICAL EDUCATION & TRAINING, EPIDEMIOLOGY, OPHTHALMOLOGY, Corneal and external diseases < OPHTHALMOLOGY                                                                                                                                     |
|                                 |                                                                                                                                                                                                                                              |

SCHOLARONE™  
Manuscripts

1  
2  
3  
4  
5  
6  
7  
8  
9  
10  
11  
12  
13  
14  
15  
16  
17  
18  
19  
20  
21  
22  
23  
24  
25  
26  
27  
28  
29  
30  
31  
32  
33  
34  
35  
36  
37  
38  
39  
40  
41  
42  
43  
44  
45  
46  
47  
48  
49  
50  
51  
52  
53  
54  
55  
56  
57  
58  
59  
60

1 **The discrepancy between subjective symptoms and clinical findings in dry eye syndrome: a**  
2 **population based analysis**

3 Rui Hua <sup>1</sup>, Kai Yao<sup>2</sup>, Yuedong Hu<sup>1</sup>, Lei Chen <sup>1,\*</sup>

4 1Department of Ophthalmology, First Hospital of China Medical University, Shenyang, China

5 2 Department of Ophthalmology and Visual Science, Yale University School of Medicine, New  
6 Haven, Connecticut 06510

7 \* Corresponding author:

8 Lei Chen

9 Department of Ophthalmology

10 First Hospital of China Medical University,

11 No.155, Nanjingbei Street, Heping District

12 Shenyang, Liaoning Province, People's Republic of China

13 Phone: 0086-13840583355

14 Fax: 0086-24-83282630

15 Email: LeiChen51@126.com

16

17

18

19

20

21

22

23

24

1  
2  
3  
4  
5  
6  
7  
8  
9  
10  
11  
12  
13  
14  
15  
16  
17  
18  
19  
20  
21  
22  
23  
24  
25  
26  
27  
28  
29  
30  
31  
32  
33  
34  
35  
36  
37  
38  
39  
40  
41  
42  
43  
44  
45  
46  
47  
48  
49  
50  
51  
52  
53  
54  
55  
56  
57  
58  
59  
60

25 **Abstract**

26 **Objectives:** To investigate the discrepancy between symptoms and clinical findings and influencing  
27 factors in dry eye syndrome (DES).

28 **Setting:** The study was a population-based and cross-sectional study in northeast China performed,  
29 during Jul to Aug, 2007. It was carried out in two rural districts of Zhuanghe and Dawa, which were  
30 located about 377km and 177km from our hospital respectively.

31 **PARTICIPANTS:** A total of 2600 eligible residents from 1300 households were identified, and  
32 valid responses were obtained from 2262 residents with the mean age of 48 (12-88) years (926  
33 men and 1336 women; response rate, 87%).

34 **PRIMARY OUTCOME MEASURES:** All subjects received examinations of the amount of lacrimal  
35 secretion and tear film break up time (BUT) and completed a questionnaire survey about  
36 subjective symptoms.

37 **Results:** Of 2262 subjects, the discrepancy contained 960 subjects (42.44%) and there was a  
38 significant difference between the occurrence of symptoms and clinical findings ( $\chi^2=4.027$ ,  $p =$   
39  $0.045 < 0.05$ ). In addition, influencing factors included gender, smoking, environment and age.  
40 Moreover, the Schirmer I test and tear film BUT demonstrated remarkable difference among the  
41 group with neither symptoms nor clinical findings, the one with discrepancy, and the one with  
42 both DE symptoms and positive clinical findings.

43 **Conclusion:** DES is a multi-stage disease related to multi-factors. It is of great importance to put  
44 forward the pre-clinical phase concept and to screen in those outpatients with inducing factors,  
45 and future interventions should focus on the discrepancy patients.

46 **Keywords:** discrepancy; dry eye syndrome; subjective symptoms; Schirmer I test; breaking up  
47 time;

1  
2 50 **Strengths and limitations of this study**  
3

4 51 This is the first report on the discrepancy between subjective symptoms and clinical findings in dry  
5  
6 52 eye syndrome on large Chinese sample.  
7

8  
9 53 Large-scale and population-based dry eye epidemiologic studies on the discrepancy are limited in  
10  
11 54 China.  
12

13  
14 55 Our study supported the results of the Diagnostic Methodology Subcommittee that the  
15  
16 56 administration of a structured questionnaire to patients presenting to a clinic provides an  
17  
18 57 excellent opportunity for screening patients with potential dry eye disease.  
19

20  
21 58 We did not test tears osmotic pressure in the diagnostic protocol, and did not analyze the BMI and  
22  
23 59 myocardial infarction or angina risk factors.  
24

25 60 This study also lacked of the other objective tests evaluating ocular surface.  
26  
27  
28  
29  
30  
31  
32  
33  
34  
35  
36  
37  
38  
39  
40  
41  
42  
43  
44  
45  
46  
47  
48  
49  
50  
51  
52  
53  
54  
55  
56  
57  
58  
59  
60



1  
2 753  
4 **76 INTRODUCTION**

5  
6  
7 77 Dry eye (DE) is a common disorder of tear film, including tear deficiency or excessive tear  
8  
9 78 evaporation, which is harmful to the inter-palpebral ocular surface and always associated with  
10  
11 79 symptoms of ocular discomforts<sup>[1]</sup>. Posa A et al<sup>[2]</sup> reported that the majority of those questioned  
12  
13 80 DE outpatients were 40 years of age or older (88%), female (59%) and described a variety of  
14  
15 81 subjective symptoms (65%) in Germany. Dietary supplementation with a combination of omega-3  
16  
17 82 essential fatty acids and antioxidants was proved to be an effective treatment for dry eye  
18  
19 83 symptoms.<sup>[3]</sup> At present, it is easy to be ignored in clinics and the concept has not been widely  
20  
21 84 accepted in China as well. In addition to the primary auxiliary examinations including visual acuity,  
22  
23 85 external examination, as well as slit-lamp biomicroscopy (Su Zhou SIX-SIX Technological  
24  
25 86 Development Co. ,Ltd, China),<sup>[4]</sup> further diagnostic tests should be performed to assess ocular  
26  
27 87 surface damage (staining with rose bengal, lissamine green, or fluorescein dye), tear film instability  
28  
29 88 (tear breakup time (BUT) test), as well as aqueous tear flow (schirmer test).<sup>[5]</sup> It has been reported  
30  
31 89 that DE symptoms as evaluated subjectively in a questionnaire occurred in about 21% of  
32  
33 90 the adult population in China, and the authors also found that the depression was associated with  
34  
35 91 DE, in particular when the symptoms occurred in an older population from Beijing recently<sup>[6,7]</sup>.  
36  
37 92 Although there are so many population-based survey of such lesion,<sup>[8,9]</sup> large-scale and  
38  
39 93 population-based dry eye epidemiologic studies on the discrepancy are limited in China. So we  
40  
41 94 conducted an extensive survey to study the discrepancy between subjective symptoms and clinical  
42  
43 95 findings and the influencing factors in dry eye syndrome (DES).  
44  
45  
46  
47  
48  
49  
50

51 **METHODS**

52  
53  
54 97 The study was a population-based and cross-sectional study in northeast China performed, during  
55  
56 98 Jul to Aug, 2007. It was carried out in two rural districts of Zhuanghe and Dawa, which were  
57  
58 99 located about 377km and 177km from our hospital respectively. Especially, Zhuanghe (seaside)  
59  
60

1  
2 100 was near the Bohai Sea, but Dawa (backland) was not. The inhabitants mainly lived from farming.  
3  
4 101 All people living in the communities were officially registered by name, gender, and age at the  
5  
6 102 local government's office, which ensured the boundaries of the communities and the size of the  
7  
8 103 population of each of the communities were known before the start of the study. Home visits  
9  
10 104 were performed according to the registration list, and all subjects were selected randomly,  
11  
12 105 confirmed by door-to-door visitation. A total of 2600 eligible residents from 1300 households were  
13  
14 106 identified, and valid responses were obtained from 2262 residents with the mean age of 48 (12-88)  
15  
16 107 years (926 men and 1336 women; response rate, 87%).The subjects who had clear ocular surface  
17  
18 108 disease history such as keratitis or conjunctivitis were excluded.  
19  
20  
21  
22  
23 109 All subjects were required to do a questionnaire survey and their amount of tear secretion and tear  
24  
25 110 film BUT were recorded. As we know, the measurement of tear hyperosmolarity could be regarded  
26  
27 111 as a "gold standard" for DES diagnosis<sup>[4]</sup> because it gives rise to the apoptosis of cells of the  
28  
29 112 conjunctiva and cornea, and triggers inflammatory cascades that contribute to further cell death,  
30  
31 113 including loss of mucin-producing goblet cells, which exacerbating tear film instability.<sup>[10]</sup> However  
32  
33 114 it is hard to carry on such an approach under the epidemiological investigation condition.  
34  
35 115 Alternatively, BUT is also considered as the best clinical test because it also measures this  
36  
37 116 mechanism mentioned above, which has good overall accuracy,<sup>[11]</sup> and appears to be more  
38  
39 117 repeatable (varies less from visit to visit) than many other diagnostic tests.<sup>[12]</sup> As a result, BUT is  
40  
41 118 more suitable for epidemiological investigation.  
42  
43  
44  
45  
46 119 We evaluated DES using the following 7 questions developed and validated by Gulati A et al.<sup>[6,13,14]</sup>  
47  
48 120 The survey emphasized on the related ocular discomforts, including awareness, tearing, burning,  
49  
50 121 blurring and fluctuating vision, irritation, foreign body sensation as well as tired eyes (Table 1). If  
51  
52 122 three of seven questions were positive for one person simultaneously, we referred this person as  
53  
54 123 symptoms positive. Additionally, smoking status was also recorded. These data were recorded by  
55  
56 124 two investigators (RH, YDH) together.  
57  
58  
59  
60

1  
2 125 BUT: To avoid any interference, the BUT was performed before other DES tests. Fluorescein filter  
3  
4 126 paper (Tianjin Jingming New Technological Development Co., Ltd, China) was wetted and smeared  
5  
6 127 in low temporal side of bulbar conjunctiva. The subjects were advised to blink several times in  
7  
8 128 order to smear the 2% fluorescein on the surface of cornea evenly. Then, tear film stability was  
9  
10 129 measured by recording the interval between the last complete blink and the appearance of the  
11  
12 130 first random dry spot through cobalt blue filter of slit lamp. It is necessary to ensure the  
13  
14 131 standardization of the equipments and environmental condition.  
15  
16

17  
18 132 Schirmer I test: To avoid ocular irritation to other examinations by the test strip, the Schirmer's test  
19  
20 133 was performed at the end. Tear secretion test filter paper (Tianjin Jingming New Technological  
21  
22 134 Development Co. ,Ltd, China) measuring 35mm in length with a bend at 5mm was used. One  
23  
24 135 minute after topical anesthesia (20ml:80mg, oxybuprocaine hydrochloride eye drops, santan,  
25  
26 136 Japan), the filter paper was placed at the junction of medial  $\frac{2}{3}$  and lateral  $\frac{1}{3}$  of the lower lid in  
27  
28 137 the fornix. In addition, the test was carried out in dim illumination and under standard conditions  
29  
30 138 of temperature and humidity. Then the length of wetting was recorded after 5min. After that, the  
31  
32 139 subjects were requested to keep their eyes open.  
33  
34

35  
36 140 The definition of positive clinical findings in our study were: schirmer I test was less than 10mm  
37  
38 141 per 5min and tear film BUT was less than 10s<sup>[15]</sup>.All the research and measurements adhered to  
39  
40 142 the tenets of the Declaration of Helsinki and the study was approved by the Medical Research  
41  
42 143 Ethics Committee of First Hospital of China Medical University. Written informed consent was  
43  
44 144 obtained from all participants.  
45  
46

47  
48 145 All analyses were performed by SPSS version 19.0. The data were expressed as the median  
49  
50 146 (min-max). Regression analysis was performed to adjust gender, age, smoking and geographical  
51  
52 147 region. The Pearson Chi-square test was used to assess the proportions for the two cohorts as well  
53  
54 148 as the influencing factors (gender and environment) in the subjects with positive clinical findings  
55  
56 149 statistically. The influencing factors (age) in those subjects and the difference in Schirmer I test and  
57  
58  
59  
60

1  
2 150 BUT were analyzed by Kruskal - Wallis H test. A probability (p) value of less than 0.05 was  
3  
4 151 considered statistically significant.

## 6 152 **RESULTS**

8  
9 153 Logistic showed that gender (OR = 2.059, p < 0.0001), smoking (OR = 2.263, p < 0.0001) and  
10  
11 154 geographical region (seaside and backland) (OR = 0.272, p < 0.0001) were risk factors for DE  
12  
13 155 symptoms, other than age (OR = 1.400, p = 0.100 > 0.05). Moreover, there was no relationship  
14  
15 156 between symptoms and clinical findings in this study (OR = 1.112, p = 0.495 > 0.05).

16  
17  
18 157 Not only that a total of 960 out of 2262 (42%) subjects had a discrepancy between symptoms and  
19  
20 158 exams, but that 302 of 552 subjects reporting no symptoms had clinical DES findings (55%) and 658  
21  
22 159 of 1770 reporting symptoms had no clinical findings (38%). There was a significant difference in the  
23  
24 160 proportions for the two cohorts ( $\chi^2=4.027$ , p = 0.045 < 0.05) (Table 2). Of the 1302 subjects with  
25  
26 161 both symptoms and clinical findings being positive, 1052 are positive and others are negative. The  
27  
28 162 sensitivity and specificity of subjects to symptoms were 77.70% and 27.53% respectively, while the  
29  
30 163 accuracy of subjects' perception to disease was 57.56%. In addition, positive predictive value and  
31  
32 164 likelihood ratio were 61.52%, 1.072, and negative ones were 45.29%, 0.810, correspondingly.

33  
34  
35 165 For the 1354 subjects with clinical findings being positive, 622 of 780 (87.12%) females had related  
36  
37 166 symptoms; while, 390 of 574 (89.51%) males had related symptoms. Compared with males,  
38  
39 167 females were more likely to show DE symptoms ( $\chi^2=12.193$ , p < 0.0001). At the same time, there  
40  
41 168 were 574 out of 820(70.00%) subjects with symptoms living in the seaside. On the contrary, the  
42  
43 169 number of that in backland was 478 out of 534 (89.51%) subjects. Thus, subjects of backland took  
44  
45 170 a higher proportion than that of seaside( $\chi^2=35.528$ , p < 0.0001). Moreover, age showed significant  
46  
47 171 difference on whether there was DE symptoms or not (Z=1.983, P= 0.047 < 0.05).

48  
49 172 While the Schirmer I test and tear film BUT demonstrated remarkable difference between no  
50  
51 173 symptoms without clinical findings, the discrepancy, and DE symptoms with clinical findings  
52  
53 174 positive subjects (Schirmer I test:  $\chi^2=422.93$ , p < 0.0001; BUT:  $\chi^2=264.85$ , p < 0.0001) (Table 3).

1  
2 175 **DISCUSSION**  
3

4 176 DE or dysfunctional tear syndrome is one of the most frequent diagnoses in ophthalmology. Its risk  
5  
6 177 factors include age, sex (female gender), race, contact lens wear, environment with low humidity,  
7  
8 178 systemic medications, and autoimmune disorders<sup>[16]</sup>.

9  
10  
11 179 Tear film components are composed of meibomian lipids, ocular mucins and proteins, and its  
12  
13 180 stability can be assessed via a number of tools designed for clinical as well as research purposes,  
14  
15 181 including evaluation of tear break-up time and non-invasive break-time; topographic and  
16  
17 182 interferometric techniques; confocal microscopic methods; aberrometry; and visual function  
18  
19 183 tests<sup>[17]</sup>. In the present study, Schirmer I test and BUT were performed. It has been reported that  
20  
21 184 there was no close correlation between the eye symptoms and the accessory examinations of  
22  
23 185 Sjögren's syndrome patients, as found in this research that numbers of patients are insensitive to  
24  
25 186 the dry-eye symptoms with the discrepancy being 42.44%. With the positive and negative  
26  
27 187 likelihood ratio being 1.072 and 0.810 respectively (both close to 1), it is suggested that the  
28  
29 188 possibilities of evaluating the state from symptoms both correctly and wrongly are basically the  
30  
31 189 same with each other. It is indicated that the possibilities of evaluating the disease from symptoms  
32  
33 190 both correctly and wrongly are basically the same with each other.  
34  
35  
36  
37  
38

39 191 Similarly, as proved by Schein OD<sup>[18]</sup>, it was concluded that there existed distinguished difference  
40  
41 192 between the chief complaint of patients and the lab studies results. So it seemed difficult to  
42  
43 193 distinguish such lesions apparently. To our knowledge, there are several reasons for the  
44  
45 194 discrepancy between subjective symptoms and clinical findings, which seems so important to our  
46  
47 195 routine clinical work.  
48

49  
50  
51 196 First, there is gender difference. Chia EM et al insisted that women tend to show the dry-eye  
52  
53 197 symptoms, which may be related to the hormone level,<sup>[19]</sup> as the androgen pool of  
54  
55 198 non-autoimmune dry eye patients with Meibomian glands malfunctions(MGD) is significantly  
56  
57 199 depleted compared with that of non-MGD and control cases<sup>[20]</sup>. This supported our study.  
58  
59  
60

1  
2 200 Second, the environment plays an important role. Nichols JJ<sup>[21]</sup> reported that the dry-eye symptoms  
3  
4 201 were more likely to develop in patients with contact lens, compared to those with glasses, while  
5  
6 202 the normal visual counterparts seldom had any complaints. It is the decrease of the cornea  
7  
8  
9 203 sensitivity that leads to the high morbidity of ocular surface disease in Sjögren's syndrome and the  
10  
11 204 decrease of the DE symptoms<sup>[22]</sup>. Uchino M et al<sup>[14]</sup> also found that using contact len was a  
12  
13 205 common DE risk factor in both genders. It was reported that corneal sensory afferents respond to  
14  
15 206 irritating and potentially damaging stimuli, as well as drying that occurs with evaporation of the  
16  
17 207 tear film. Furthermore, DE also can modify the properties of corneal afferents and affect their  
18  
19 208 capability to regulate secretion<sup>[23]</sup>.  
20  
21 209 In addition, DE in the workplace is associated with increasing use of screens and electronic devices  
22  
23 210 and environmental conditions in modern office designs and other environments. Also it is affected  
24  
25 211 by the occupational exposure to ionizing radiation, chemicals or atmospheric dust with increased  
26  
27 212 ocular dryness<sup>[24]</sup>. In addition, it is suggested that high precorneal relative humidity protects the  
28  
29 213 precorneal tear film against desiccation and airborne chemicals and reduces the development of  
30  
31 214 eye irritation by airborne sensory irritants<sup>[25]</sup>. Da Wa as a backland, has lower humidity in the  
32  
33 215 atmosphere, which leads to distinctive dry-eye symptoms.  
34  
35 216 Similar to Uchino M's study that ophthalmic findings revealed short BUT and corneal staining  
36  
37 217 accompanied by normal Schirmer test values, we also found the discrepancy between subjective  
38  
39 218 symptoms and clinical findings in DES<sup>[26]</sup>. In the subjects with clinical findings being positive, the  
40  
41 219 subjects with complaints of DE symptoms had less tear secretion volume and lower tear film  
42  
43 220 stability, which suggested the existence of a "latent stage". According to the severity of the  
44  
45 221 amount of tear secretion and tear film BUT, we tried to rank all subjects: 1. No symptoms without  
46  
47 222 clinical findings; 2. The discrepancy between DE symptoms and clinical findings; 3. DE symptoms  
48  
49 223 with clinical findings being positive. The rank may represent the lesions progression. Moreover, we  
50  
51 224 should pay more attention to the discrepancy stage (2), which are tended to be ignored.  
52  
53  
54  
55  
56  
57  
58  
59  
60

1  
2 225 It was widely considered that the increase in age is closely related to the severity of the DE  
3  
4 226 symptoms. Recently, it has been reported that DE is prevalent among young to middle-aged  
5  
6 227 Japanese visual display terminal users. Increased risk for DED was noted in women aged over 30  
7  
8 228 years.<sup>[26]</sup> In this survey, we found that the age was not a risk factor for DE symptoms in all samples,  
9  
10 229 which may be due to the discrepancy, but there was a significant difference in the subjects with  
11  
12 230 clinical findings being positive.

13  
14  
15 231 As therapy strategies, we need to treat both signs and symptoms of the discrepancy subjects.  
16  
17 232 Currently, artificial tear emulsion may be an effective way to treat the signs and symptoms of DE in  
18  
19 233 meibomian gland dysfunction (MGD) cases<sup>[27]</sup>. On the other hand, Barabino S et al<sup>[28]</sup> reported that  
20  
21 234 the combination of hyaluronic acid and tamarind seed polysaccharide also could improve the  
22  
23 235 symptoms of DE effectively.

24  
25  
26 236 Even so, the study had some limitations. For example, we did not test tears osmotic pressure in  
27  
28 237 the diagnostic protocol, and did not analyze the BMI and myocardial infarction or angina risk  
29  
30 238 factors, as reported by Uchino M<sup>[26]</sup>. This study also lacked of the other objective tests evaluating  
31  
32 239 ocular surface. These will be improved in our future study.

33  
34  
35 240 Our study suggested that there were so many potential DES without any symptoms. The  
36  
37 241 occupations of the population in this study are mainly farmers, so we should pay more attention  
38  
39 242 to the special group. In addition, it is necessary to screen in those outpatients with inducing  
40  
41 243 factors, and future interventions should focus on the discrepancy patients. Similarly, the  
42  
43 244 Diagnostic Methodology Subcommittee also concluded that the administration of a structured  
44  
45 245 questionnaire to patients presenting to a clinic provides an excellent opportunity for screening  
46  
47 246 patients with potential dry eye disease.<sup>[11]</sup>

48  
49  
50 247 In conclusion, DES is a multi-stage disease related to multi-factors, and influencing factors of DE  
51  
52 248 symptoms included gender, smoking, environment as well as age. It is of great importance to make  
53  
54  
55  
56  
57  
58  
59  
60

1  
2 249 the progression of the disease clear, put forward the pre-clinical phase concept and recognize the  
3  
4 250 discrepancy, which may contribute to the prevention, diagnosis and treatment.

5  
6  
7 251 There is no financial Support and any conflict of interest for this study.

8  
9 252 **Acknowledgments**

10  
11 253 This work was supported in part by Dr Lei Liu, Dr Yizhou Sun and Dr Jun Chen in the follow-up in  
12  
13 254 Department of Ophthalmology, First Hospital of China Medical University.

14  
15  
16 255 **Authors' contributions**

17  
18 256 Study concept and design: LC and RH. Acquisition of data: RH and YDH. Analysis and interpretation  
19  
20 257 of data: RH YDH and LC. Drafting of the manuscript: RH and KY. Critical revision of the manuscript  
21  
22 258 for important intellectual content: LC. All authors read and approved the final manuscript.

23  
24  
25 259 **Competing Interests**

26  
27  
28 260 There is no financial Support and any conflict of interest for this study.

29  
30 261 **Data Sharing Statement**

31  
32 262 No additional data available

33  
34 263

35  
36 264

37  
38 265

39  
40 266

41  
42 267

43  
44 268

45  
46 269

47  
48 270

49  
50 271

51  
52 272

53  
54 273



274 **REFERENCES**

- 275 1. Lemp MA. Report of the national eye institute / industry workshop on clinical trials in dry eyes  
276 CLAO J. 1995; 21(4):221-232.
- 277 2. Posa A, Sel S, Dietz R, Sander R, Bräuer L, Paulsen F. Updated Incidence of Dry Eye Syndrome in  
278 Germany. *Klin Monbl Augenheilkd*. 2014; 231(1):42-46.
- 279 3. Oleňik A. Effectiveness and tolerability of dietary supplementation with a combination of  
280 omega-3 polyunsaturated fatty acids and antioxidants in the treatment of dry eye symptoms:  
281 results of a prospective study. *Clin Ophthalmol*. 2014; 8:169-176.
- 282 4. Bron AJ. Diagnosis of dry eye. *Surv Ophthalmol*. 2001; 45 Suppl 2:S221-226.
- 283 5. Perry HD. Dry eye disease: pathophysiology, classification, and diagnosis. *Am J Manag Care*. 2008;  
284 14:S79-87.
- 285 6. Jie Y, Xu L, Wu YY, Jonas JB. Prevalence of dry eye among adult Chinese in the Beijing Eye Study.  
286 *Eye (Lond)*. 2009; 23:688-693.
- 287 7. Labbé A, Wang YX, Jie Y, Baudouin C, Jonas JB, Xu L. Dry eye disease, dry eye symptoms and  
288 depression: the Beijing Eye Study. *Br J Ophthalmol*. 2013; 97(11):1399-1403.
- 289 8. Onwubiko SN, Eze BI, Udeh NN, Arinze OC, Onwasigwe EN, Umeh RE. Dry eye disease:  
290 Prevalence, distribution and determinants in a hospital-based population. *Cont Lens Anterior Eye*.  
291 2013; pii: S1367-0484(13)00279-8.
- 292 9. van Landingham SW, West SK, Akpek EK, Muñoz B, Ramulu PY. Impact of dry eye on reading in a  
293 population based sample of the elderly: the Salisbury Eye Evaluation. *Br J Ophthalmol*. 2013; doi:  
294 10.1136/bjophthalmol-2013-303518.
- 295 10. Baudouin C, Aragona P, Messmer EM, Tomlinson A, Calonge M, Boboridis KG, Akova YA,  
296 Geerling G, Labetoulle M, Rolando M. Role of hyperosmolarity in the pathogenesis and  
297 management of dry eye disease: proceedings of the OCEAN group meeting. *Ocul Surf*. 2013;

- 1  
2 298 11(4):246-258.  
3  
4  
5 299 11. Bron, AJ . Methodologies to diagnose and monitor dry eye disease: report of the Diagnostic  
6  
7 300 Methodology Subcommittee of the International Dry Eye WorkShop (2007). 2007; Ocul Surf  
8  
9  
10 301 5(2):108-152.  
11  
12 302 12. Nichols KK, Mitchell GL, Zadnik K. The repeatability of clinical measurements of dry eye.  
13  
14 303 Cornea.2004; 23: 272-285.  
15  
16 304 13. Gulati A, Sullivan R, Buring JE, Sullivan DA, Dana R, Schaumberg DA. Validation and  
17  
18 305 repeatability of a short questionnaire for dry eye syndrome. Am J Ophthalmol. 2006; 142:125–131.  
19  
20  
21 306 14. Uchino M, Nishiwaki Y, Michikawa T, Shirakawa K, Kuwahara E, Yamada M, Dogru M,  
22  
23 307 Schaumberg DA, Kawakita T, Takebayashi T, Tsubota K. Prevalence and risk factors of dry eye  
24  
25 308 disease in Japan: Koumi study. Ophthalmology.2011; 118:2361-2367.  
26  
27  
28 309 15. Zhang Mei, Chen Jiaqi, Liu Zhuguo. The diagnosis of dye eye syndrome. Chinese Journal of  
29  
30 310 Practical Ophthalmology. 2000; 18: 664-668.  
31  
32  
33 311 16. Kaštelan S, Tomić M, Salopek-Rabatić J, Novak B. Diagnostic Procedures and Management of Dry  
34  
35 312 Eye. Biomed Res Int 2013:309723.  
36  
37  
38 313 17. Sweeney DF, Millar TJ, Raju SR. Tear film stability: A review. Exp Eye Res. 2013; 117:28-38..  
39  
40 314 18. Schein OD, Tielsch JM, Munõz B, Bandeen-Roche K, West S. Relation between signs and  
41  
42 315 symptoms of dry eye in the elderly. A population-based perspective. Ophthalmology.1997;  
43  
44 316 104:1395-1401.  
45  
46  
47 317 19. Chia EM, Mitchell P, Rochtchina E, Lee AJ, Maroun R, Wang JJ. Prevalence and associations of  
48  
49 318 dry eye syndrome in an older population: the Blue Mountains Eye Study. Clin Experiment  
50  
51 319 Ophthalmol. 2003; 31:229-232  
52  
53  
54 320 20. Tamer C, Oksuz H, Sogut S. Androgen status of the nonautoimmune dry eye subtypes.  
55  
56 321 Ophthalmic Res. 2006; 38:280-286.  
57  
58  
59  
60

- 1  
2 322 21. Nichols JJ, Ziegler C, Mitchell GL, Nichols KK. Self-reported dry eye disease across refractive  
3  
4 323 modalities : Invest Ophthalmol Vis Sci. 2005; 46:1911-1914  
5  
6 324 22. Adataia FA, Michaeli-Cohen A, Naor J, Caffery B, Bookman A, Slomovic A. Correlation between  
7  
8 325 corneal sensitivity, subjective dry eye symptoms and corneal staining in Sjögren's syndrome. Can J  
9  
10 326 Ophthalmol. 2004; 39:767-771.  
11  
12 327 23. Meng ID, Kurose M. The role of corneal afferent neurons in regulating tears under normal and  
13  
14 328 dry eye conditions. Exp Eye Res.2013; 117:79-87.  
15  
16 329 24.Vicente-Herrero MT, Ramírez-Iñiguez de la Torre MV, Terradillos-García MJ, López González AA.  
17  
18 330 Dry eye syndrome. Occupational risk factors, valuation and prevention. Semergen. 2013; pii:  
19  
20 331 S1138-3593(13)00126-3.  
21  
22 332 25. Wolkoff P, Nøjgaard JK, Franck C, Skov PG. Does the modern office environment desiccate the  
23  
24 333 eyes? Ugeskr Laeger. 2006; 168:3893-3896.  
25  
26 334 26. Uchino M, Yokoi N, Uchino Y, Dogru M, Kawashima M, Komuro A, Sonomura Y, Kato H, Kinoshita  
27  
28 335 S, Schaumberg DA, Tsubota K. Prevalence of Dry Eye Disease and its Risk Factors in Visual Display  
29  
30 336 Terminal Users: The Osaka Study. Am J Ophthalmol.2013; 156(4):759-766.  
31  
32 337 27.Sindt CW, Foulks GN. Efficacy of an artificial tear emulsion in patients with dry eye associated  
33  
34 338 with meibomian gland dysfunction. Clin Ophthalmol. 2013; 7:1713-1722.  
35  
36 339 28. Barabino S, Rolando M, Nardi M, Bonini S, Aragona P, Traverso CE. The effect of an artificial tear  
37  
38 340 combining hyaluronic acid and tamarind seeds polysaccharide in patients with moderate dry eye  
39  
40 341 syndrome: a new treatment for dry eye. Eur J Ophthalmol. 2013; 20;24(2):173-178.  
41  
42 342  
43  
44 343  
45  
46 344  
47  
48 345  
49  
50 346  
51  
52  
53  
54  
55  
56  
57  
58  
59  
60

1  
2 347 **Table 1 Dry eye questionnaire for this survey**

- 3  
4 1. Do your eyes ever feel dry?  
5  
6 2. Do your eyes ever have tearing?  
7  
8 3. Do your eyes ever feel burning?  
9  
10 4. Do your eyes ever have blurring and fluctuating vision?  
11  
12 5. Do your eyes ever feel irritation?  
13  
14 6. Do your eyes ever feel foreign body sensation?  
15  
16 7. Do your eyes ever feel tired?  
17

18 348 Possible answers to the questions were 'none or rarely', 'sometimes', and 'often or all the time'. The positive  
19  
20 349 symptoms was defined as having 'sometimes' or 'often or all the time'.  
21

22 350

23 351

24 352

25 353

26 354

27 355

28 356

29 357

30 358

31 359

32 360

33 361

34 362

35 363

36 364

37 365

38 366

39 367

40

368 **Table 2 Discrepancy between symptoms and clinical findings**

|          |        | Clinical findings |        |       |
|----------|--------|-------------------|--------|-------|
|          |        | DE                | normal | total |
|          | DE     | 1052              | 658    | 1710  |
| Symptoms | normal | 302               | 250    | 552   |
|          | Total  | 1354              | 908    | 2262  |

369

370

371

372

373

374

375

376

377

378

379

380

381

382

383

384

385

386

387

388

389

390

1  
2  
3  
4  
5  
6  
7  
8  
9  
10  
11  
12  
13  
14  
15  
16  
17  
18  
19  
20  
21  
22  
23  
24  
25  
26  
27  
28  
29  
30  
31  
32  
33  
34  
35  
36  
37  
38  
39  
40  
41  
42  
43  
44  
45  
46  
47  
48  
49  
50  
51  
52  
53  
54  
55  
56  
57  
58  
59  
60

391 **Table 3 Comparison of Schirmer I test and tear film break up time**

| Symptoms    | Clinical findings | Schirmer I test (mm) | BUT (s)         |
|-------------|-------------------|----------------------|-----------------|
| Normal      | Normal            | 22.0 (2.0-30.0)      | 12.5 (0.0-30.0) |
| Discrepancy |                   | 15.0 (0.0-30.0)      | 9.0 (0.0-30.0)  |
| DE          | DE                | 5.0 (0.0-30.0)       | 4.0 (0.0-20.0)  |

392

393

For peer review only

1  
2  
3  
4  
5  
6  
7  
8  
9  
10  
11  
12  
13  
14  
15  
16  
17  
18  
19  
20  
21  
22  
23  
24  
25  
26  
27  
28  
29  
30  
31  
32  
33  
34  
35  
36  
37  
38  
39  
40  
41  
42  
43  
44  
45  
46  
47  
48  
49  
50  
51  
52  
53  
54  
55  
56  
57  
58  
59  
60

1 **The discrepancy between subjective symptoms and clinical findings in dry eye syndrome: a**  
2 **population based analysis**

3 Rui Hua <sup>1</sup>, Kai Yao<sup>2</sup>, Yuedong Hu<sup>1</sup>, Lei Chen <sup>1,\*</sup>

4 1Department of Ophthalmology, First Hospital of China Medical University, Shenyang, China

5 2 Department of Ophthalmology and Visual Science, Yale University School of Medicine, New  
6 Haven, Connecticut 06510

7 \* Corresponding author:

8 Lei Chen

9 Department of Ophthalmology

10 First Hospital of China Medical University,

11 No.155, Nanjingbei Street, Heping District

12 Shenyang, Liaoning Province, People's Republic of China

13 Phone: 0086-13840583355

14 Fax: 0086-24-83282630

15 Email: LeiChen51@126.com

1  
2  
3  
4  
5  
6  
7  
8  
9  
10  
11  
12  
13  
14  
15  
16  
17  
18  
19  
20  
21  
22  
23  
24  
25  
26  
27  
28  
29  
30  
31  
32  
33  
34  
35  
36  
37  
38  
39  
40  
41  
42  
43  
44  
45  
46  
47  
48  
49  
50  
51  
52  
53  
54  
55  
56  
57  
58  
59  
60

25 **Abstract**

26 **Objectives:** To investigate the discrepancy between symptoms and clinical findings and influencing  
27 factors in dry eye ~~syndrome~~ (DES).

28 **Setting:** The study was a population-based and cross-sectional study in northeast China performed,  
29 during Jul to Aug, 2007. It was carried out in two rural districts of Zhuanghe and Dawa, which were  
30 located about 377km and 177km from our hospital respectively.

31 **PARTICIPANTS:** A total of 2600 eligible residents from 1300 households were identified, and  
32 valid responses were obtained from 2262 residents with the mean age of 48 (12-88) years (926  
33 men and 1336 women; response rate, 87%). The subjects with the disagreement between the  
34 occurrence of symptoms and clinical findings, was regarded to the discrepancy.

35 **PRIMARY OUTCOME MEASURES:** All subjects received examinations of the amount of lacrimal  
36 secretion (Schirmer II) and tear film break up time (BUT) and completed a questionnaire survey  
37 about subjective symptoms.

38 **Results:** ~~In~~Of 2262 subjects, the discrepancy contained 960 subjects (42.44%) with and there was  
39 a significant difference between the occurrence of symptoms and clinical findings ( $\chi^2=4.027$ ,  $p =$   
40  $0.045 < 0.05$ ). In addition, influencing factors for subjective symptoms included gender, smoking,  
41 environment and age. Moreover, the Schirmer I| test and tear film BUT demonstrated remarkable  
42 difference among the normal group, \_with neither symptoms nor clinical findings, the one with  
43 discrepancy, and the subjectone with both DE symptoms and positive clinical findings.

44 **Conclusion:** DES is a multi-stage disease related to multi-factors. It is of great importance to put  
45 forward the pre-clinical phase concept (the patients who have symptoms of dry eye and yet show  
46 no aqueous deficiency or evaporative signs) and to screen in those outpatients with inducing  
47 factors, and future interventions should focus on the discrepancy patients.

48 **Keywords:** discrepancy; dry eye syndrome; subjective symptoms; Schirmer I| test; breaking up  
49 time;



## Strengths and limitations of this study

To our knowledge, ~~t~~his is the first report on the discrepancy between subjective symptoms and clinical findings in dry eye syndrome on large Chinese sample.

Large-scale and population-based dry eye epidemiologic studies on the discrepancy are limited in China.

Our study supported the results of the Diagnostic Methodology Subcommittee that the administration of a structured questionnaire to patients presenting to a clinic provides an excellent opportunity for screening patients with potential dry eye disease.

We did not test tears osmotic pressure (tear osmolarity) in the diagnostic protocol, ~~and did not analyze the BMI and myocardial infarction or angina risk factors.~~

This study also lacked of the other objective tests evaluating ocular surface.

## INTRODUCTION

Dry eye (DE) is a multifactorial disease of the tears and ocular surface that results in symptoms of discomfort, visual disturbance, and tear film instability with potential damage to the ocular surface. It is accompanied by increased osmolarity of the tear film and inflammation of the ocular surface

~~Dry eye (DE) is a common disorder of tear film, including tear deficiency or excessive tear evaporation, which is harmful to the inter palpebral ocular surface and always associated with symptoms of ocular discomforts~~<sup>[1]</sup>. Posa A et al<sup>[2]</sup> reported that the risk factorsmajority of those questioned DE outpatients were 40 years of age or older (88%), female (59%) and described a variety of subjective symptoms (65%) in Germany. Compared with isotonic 0.1% Sodium Hyaluronate eye drops, hypotonic 0.18% Sodium Hyaluronate eye drops were reported to be effective in improving tear film stability and ocular surface integrity in patients with mild DE.<sup>[3]</sup> In addition, dietary supplementation with a combination of omega-3 essential fatty acids and antioxidants was proved to be an effective treatment for dry eye symptoms.<sup>[4,5]</sup> At present, dry eye is often ignored ~~At present, it is easy to be ignored~~ in clinics and the concept has not been widely accepted in China as well. In addition to the primary auxiliary examinations including visual acuity, external examination, as well as slit-lamp biomicroscopy (Su Zhou SIX-SIX Technological Development Co. ,Ltd, China),<sup>[54]</sup> further diagnostic tests should be performed to assess ocular surface damage (staining with rose bengal, lissamine green, or fluorescein dye), tear film instability (tear breakup time (BUT) test), as well as aqueous tear flow (schirmer test).<sup>[65]</sup> It has been reported that DE symptoms as evaluated subjectively in a questionnaire occurred in about 21% of the adult population in China, and the authors also found that the depression was associated with DE, in particular when the symptoms occurred in an older population from Beijing recently<sup>[76,87]</sup>. Although there are so many population-based survey of such conditionlesion,<sup>[98,109]</sup> large-scale and population-based dry eye epidemiologic studies on the discrepancy are limited in China. So we conducted an extensive survey to ~~study the discrepancy between subjective symptoms and clinical~~

~~findings and the influencing factors in dry eye syndrome (DES) determine the lack of correlation between symptoms and two tests of DE.~~

## METHODS

The study was a population-based and cross-sectional study in northeast China ~~conducted~~performed, during Jul to Aug, 2007. It was carried out in two rural districts of Zhuanghe and Dawa, which were located about 377km and 177km from our hospital respectively. Especially, ~~the Zhuanghe district is located near the Bohai Sea, while the Dawa district is inland. The majority of the inhabitants in both districts were farmers. Zhuanghe (seaside) was near the Bohai Sea, but Dawa (backland) was not. The inhabitants mainly lived from farming.~~ All people living in the communities were officially registered by name, gender, and age at the local government's office, which ensured the boundaries of the communities and the size of the population of each of the communities were known before the start of the study. Home visits were performed according to the registration list, ~~and a self-administered questionnaire was distributed~~and. All enrolled subjects aged 12 or older were selected by cluster sampling randomly, and confirmed by door-to-door visitation. Excluding ineligible population owing to death, moving out of the town, nursing, or hospitalization. A total of 2600 eligible residents from 1300 households were identified, and valid responses were obtained from 2262 residents with the mean age of 48 (12-88) years (926 men and 1336 women; response rate, 87%). If the subject was unwilling to join this study, or did not receive all the tests, one invalid response was recorded. The subjects who had clear ocular surface disease history such as keratitis or conjunctivitis were excluded. Besides, if these lesions were detected by the slit lamp at the scene, the corresponding subjects were excluded too. The eligible subjects were requested to come to a certain room in each community for investigation. All the research and measurements adhered to the tenets of the Declaration of Helsinki and the study was approved by the Medical Research Ethics Committee of First Hospital of China Medical University. Written informed consent was obtained from all participants.

1  
2 125 All subjects were required to do a questionnaire survey and their amount of tear secretion and tear  
3  
4 126 film BUT were recorded at the scene of the epidemiological investigation. ~~As we know, the~~  
5  
6 127 ~~measurement of tear hyperosmolarity could be regarded as a “gold standard” for DES diagnosis<sup>[4]</sup>~~  
7  
8 128 ~~because it gives rise to the apoptosis of cells of the conjunctiva and cornea, and triggers~~  
9  
10 129 ~~inflammatory cascades that contribute to further cell death, including loss of mucin-producing~~  
11  
12 130 ~~goblet cells, which exacerbating tear film instability.<sup>[10]</sup> However it is hard to carry on such an~~  
13  
14 131 ~~approach under the epidemiological investigation condition. Alternatively, BUT is also considered~~  
15  
16 132 ~~as the best clinical test because it also measures this mechanism mentioned above, which has~~  
17  
18 133 ~~good overall accuracy,<sup>[11]</sup> and appears to be more repeatable (varies less from visit to visit) than~~  
19  
20 134 ~~many other diagnostic tests.<sup>[12]</sup> As a result, BUT is more suitable for epidemiological investigation.~~  
21  
22 135 We evaluated dry eye symptomsDES using the following 7 questions developed and validated by  
23  
24 136 Gulati A et al.<sup>[7,113,124]</sup> The survey emphasized ~~on the~~ related ocular discomforts, including  
25  
26 137 awareness, tearing, burning, blurring and fluctuating vision, irritation, foreign body sensation as  
27  
28 138 well as tired eyes (Table 1). Those subjects who identified 3 of 7 questions as positive were  
29  
30 139 labelled as symptom positive ~~three of seven questions were positive for one person~~  
31  
32 140 ~~simultaneously, we referred this person as symptoms positive~~. Additionally, smoking status was  
33  
34 141 also recorded. These data were recorded by two investigators (RH, YDH) together, who conducted  
35  
36 142 an in house interview of these people.  
37  
38 143 BUT: To avoid any interference, the BUT was performed before other DES tests. Fluorescein filter  
39  
40 144 paper (Tianjin Jingming New Technological Development Co., Ltd, China) was wetted and smeared  
41  
42 145 in low temporal side of bulbar conjunctiva. The subjects were advised to blink several times in  
43  
44 146 order to smear the 2% fluorescein on the surface of cornea evenly. Then, tear film stability was  
45  
46 147 measured by recording the interval between the last complete blink and the appearance of the  
47  
48 148 first random dry spot through cobalt blue filter of slit lamp. It is necessary to ensure the  
49  
50 149 standardization of the equipments ~~and environmental condition~~. For example, the same type slit  
51  
52  
53  
54  
55  
56  
57  
58  
59  
60

1  
2 150 lamps should be used.

3  
4 151 Schirmer III test: To avoid ocular irritation to other examinations by the test strip, the Schirmer's  
5  
6 152 test was performed at the end. Tear secretion test filter paper (Tianjin Jingming New Technological  
7  
8 153 Development Co. ,Ltd, China) measuring 35mm in length with a bend at 5mm was used. One  
9  
10 154 minute after topical anesthesia (20ml:80mg, oxybuprocaine hydrochloride eye drops, santan,  
11  
12 155 Japan), the filter paper was placed at the junction of medial 2/3 and lateral 1/3 of the lower lid in  
13  
14 156 the fornix. In addition, the test was carried out in dim illumination and under standard conditions  
15  
16 157 of temperature and humidity. For example, the indoor temperature and humidity should be kept at  
17  
18 158 20-25°C, and 45%-65% by air condition respectively. Then the length of wetting was recorded after  
19  
20 159 5min. After that, the subjects were requested to keep their eyes open.

21  
22 160 The definition of positive clinical findings in our study were: schirmer I test was less than 10mm  
23  
24 161 per 5min and tear film BUT was less than 10s<sup>[1,35]</sup>. The subjects with the disagreement between the  
25  
26 162 occurrence of symptoms and clinical findings, was regarded to the discrepancy.~~All the research and~~  
27  
28 163 ~~measurements adhered to the tenets of the Declaration of Helsinki and the study was approved by~~  
29  
30 164 ~~the Medical Research Ethics Committee of First Hospital of China Medical University. Written~~  
31  
32 165 ~~informed consent was obtained from all participants.~~

33  
34 166 All analyses were performed by SPSS version 19.0. The data were expressed as the median  
35  
36 167 (min-max). Regression analysis was performed to adjust gender, age, smoking and geographical  
37  
38 168 region. The Pearson Chi-square test was used to assess the proportions for the two cohorts as well  
39  
40 169 as the influencing factors (gender and environment) in the subjects with positive clinical findings  
41  
42 170 statistically. The influencing factors (age) in those subjects and the difference in Schirmer I test  
43  
44 171 and BUT were analyzed by Kruskal - Wallis H test. A probability (p) value of less than 0.05 was  
45  
46 172 considered statistically significant.

## 173 RESULTS

174 ~~Logistic showed that gender (OR = 2.059, p < 0.0001), smoking (OR = 2.263, p < 0.0001) and~~

~~geographical region (seaside and backland) (OR = 0.272, p < 0.0001) were risk factors for DE symptoms, other than age (OR = 1.400, p = 0.100 > 0.05). Moreover, there was no relationship between symptoms and clinical findings in this study (OR = 1.112, p = 0.495 > 0.05).~~

Of the 2262 subjects, 1710 subjects had symptoms and 1354 subjects had low BUT and Schrimers. Additionally, the discrepancy contained 960 subjects (42.44%) with significant difference Not only that a total of 960 out of 2262 (42%) subjects had a discrepancy between symptoms and exams, but that 302 of 552 subjects reporting no symptoms had clinical DES findings (55%) and 658 of 1770 reporting symptoms had no clinical findings (38%). There was a significant difference in the proportions for the two cohorts ( $\chi^2=4.027$ , p = 0.045 < 0.05) (Table 2). Of the 1302 subjects with both symptoms and clinical findings being positive, 1052 are positive and others are negative. The sensitivity and specificity of subjects to symptoms were 77.70% and 27.53% respectively, while the accuracy of subjects` perception to disease was 57.56%. In addition, positive predictive value and likelihood ratio were 61.52%, 1.072, and negative ones were 45.29%, 0.810, correspondingly.

Logistic showed that there was no relationship between symptoms and clinical findings in this study (OR = 1.112, p = 0.495 > 0.05). Moreover, gender (OR = 2.059, p < 0.0001), smoking (OR = 2.263, p < 0.0001) and geographical region (seaside and backland) (OR = 0.272, p < 0.0001) were risk factors for DE subjective symptoms, other than age (OR = 1.400, p = 0.100 > 0.05).

For the 1354 subjects with clinical findings being positive, 622 of 780 (87.12%) females had related symptoms; while, 390 of 574 (89.51%) males had related symptoms. Compared with males, females were more likely to show DE symptoms ( $\chi^2=12.193$ , p < 0.0001). At the same time, there were 574 out of 820(70.00%) subjects with symptoms living in the seaside. On the contrary, the number of that in backland was 478 out of 534 (89.51%) subjects. Thus, subjects of backland took a higher proportion than that of seaside( $\chi^2=35.528$ , p< 0.0001). Moreover, age showed significant difference on whether there was DE symptoms or not (Z=1.983, P= 0.047<0.05).

1  
2 199 While the Schirmer I test and tear film BUT demonstrated remarkable difference between the  
3  
4 200 normal group, no symptoms without clinical findings, the discrepancy, and the subjects with both  
5  
6 201 DE symptoms and positive clinical findings~~DE symptoms with clinical findings~~ positive subjects  
7  
8  
9 202 (Schirmer I test:  $\chi^2=422.93$ ,  $p<0.0001$ ; BUT:  $\chi^2=264.85$ ,  $p<0.0001$ ) (Table 3).

## 11 203 DISCUSSION

12  
13  
14 204 DE or dysfunctional tear syndrome is one of the most frequent diagnoses in ophthalmology. Its risk  
15  
16 205 factors include age, sex (female gender), race, contact lens wear, environment with low humidity,  
17  
18 206 systemic medications, and autoimmune disorders<sup>[146]</sup>.

19  
20  
21 207 Tear film components are composed of meibomian lipids, ocular mucins and proteins, and its  
22  
23 208 stability can be assessed via a number of tools designed for clinical as well as research purposes,  
24  
25 209 including evaluation of tear break-up time and non-invasive break-time; topographic and  
26  
27  
28 210 interferometric techniques; confocal microscopic methods; aberrometry; and visual function  
29  
30 211 tests<sup>[157]</sup>. In the present study, Schirmer I test and BUT were performed. As we know, the  
31  
32 212 measurement of tear hyperosmolarity could be regarded as a “gold standard” for DE diagnosis<sup>[5]</sup>  
33  
34 213 because it gives rise to the apoptosis of cells of the conjunctiva and cornea, and triggers  
35  
36 214 inflammatory cascades that contribute to further cell death, including loss of mucin-producing  
37  
38 215 goblet cells, which exacerbating tear film instability.<sup>[16]</sup> Sullivan BD, et al reported that tear film  
39  
40 216 osmolarity had the lowest variability among commonly used signs of DE, and reductions in  
41  
42 217 osmolarity preceded changes in symptoms during a 3-month therapy.<sup>[17]</sup> In addition, tear film  
43  
44 218 osmolarity was proved to be the single best marker of disease severity across normal,  
45  
46 219 mild/moderate, and severe DE.<sup>[18]</sup> However it is hard to carry on such an approach under the  
47  
48 220 epidemiological investigation condition. Alternatively, BUT is also considered as the best clinical  
49  
50 221 test because it also measures this mechanism mentioned above, which has good overall  
51  
52 222 accuracy,<sup>[19]</sup> and appears to be more repeatable (varies less from visit to visit) than many other  
53  
54 223 diagnostic tests.<sup>[20]</sup> As a result, BUT is more suitable for epidemiological investigation.  
55  
56  
57  
58  
59  
60

1  
2 224 ~~The .It has been reported that there was no close correlation between the eye symptoms and the~~  
3  
4 225 ~~accessory examinations of Sjögren's syndrome patients, as found in this research that~~ numbers of  
5  
6 226 patients are insensitive to the dry-eye symptoms with the discrepancy being 42.44%. With the  
7  
8  
9 227 positive and negative likelihood ratio being 1.072 and 0.810 respectively (both close to 1), ~~it is~~  
10  
11 228 ~~suggested that the possibilities of evaluating the state from symptoms both correctly and wrongly~~  
12  
13 229 ~~are basically the same with each other.~~ It is indicated that the possibilities of evaluating the disease  
14  
15  
16 230 from symptoms both correctly and wrongly are basically the same with each other.  
17  
18 231 Similarly, as proved by Schein OD<sup>[2148]</sup>, it was concluded that there existed distinguished difference  
19  
20 232 between the chief complaint of patients and the lab studies results. So it seemed difficult to  
21  
22 233 distinguish such lesions apparently. To our knowledge, there are several reasons for the  
23  
24 234 discrepancy between subjective symptoms and clinical findings, which seems so important to our  
25  
26  
27 235 routine clinical work.  
28  
29  
30 236 First, there is gender difference. Chia EM et al insisted that women tend to show the dry-eye  
31  
32 237 symptoms, which may be related to the hormone level,<sup>[2249]</sup> as the androgen pool of  
33  
34 238 non-autoimmune dry eye patients with Meibomian glands malfunctions(MGD) is significantly  
35  
36 239 depleted compared with that of non-MGD and control cases<sup>[2320]</sup>. This supported our study. In the  
37  
38  
39 240 present study, females were more likely to show DE symptoms.  
40  
41  
42 241 Second, the environment plays an important role. Nichols JJ<sup>[221]</sup> ~~reported that the dry eye symptoms~~  
43  
44 242 ~~were more likely to develop in patients with contact lens, compared to those with glasses, while~~  
45  
46 243 ~~the normal visual counterparts seldom had any complaints. It is the decrease of the cornea~~  
47  
48 244 ~~sensitivity that leads to the high morbidity of ocular surface disease in Sjögren's syndrome and the~~  
49  
50 245 ~~decrease of the DE symptoms<sup>[22]</sup>. Uchino M et al<sup>[44]</sup> also found that using contact lens was a~~  
51  
52 246 ~~common DE risk factor in both genders. It was reported that corneal sensory afferents respond to~~  
53  
54 247 ~~irritating and potentially damaging stimuli, as well as drying that occurs with evaporation of the~~  
55  
56  
57  
58  
59  
60



1  
2  
3 248 tear film. Furthermore, DE also can modify the properties of corneal afferents and affect their  
4  
5 249 capability to regulate secretion<sup>[23]</sup>. Predicted roles of environmental conditions, such as wind speed  
6  
7 250 and relative humidity, on tear-film stability agree with clinical observations. More importantly,  
8  
9  
10 251 locally elevated evaporation leads to hyperosmolar spots in the tear film and, hence, vulnerability  
11  
12 252 to epithelial irritation. In addition to evaporation rate, tear-film instability depends on the strength  
13  
14  
15 253 of healing flow from the neighboring region outside the breakup region,<sup>[24]</sup>  
16  
17  
18 254 Many DE patients are sensitive to adverse environments where tear evaporation rate (TER)  
19  
20 255 increases, due to a reverse correlation with environmental humidity in the range of 5% to  
21  
22 256 70%, with TER reduced to zero at 70% relative humidity.<sup>[25]</sup> In addition, adult patients with  
23  
24  
25 257 mild-to-moderate dry eye and asymptomatic subjects of similar ages can experience acute  
26  
27  
28 258 exacerbation, after exposing to controlled low humidity (5% relative humidity, desiccating  
29  
30 259 environment) for 2 hours.<sup>[26]</sup> Moreover, Tesón M, et al reported that compared with a simulated  
31  
32  
33 260 standard condition of 23°C, 45% relative humidity, and 930 millibars of barometric pressure, a  
34  
35 261 simulated in-flight condition of 23°C, 5% relative humidity, localized air flow, and 750 millibars will  
36  
37  
38 262 aggravate the symptom, the reduction in tear stability and volume.<sup>[27]</sup> These  
39  
40 263 environmental conditions causes tear hyperosmolarity, because, although the water evaporates  
41  
42  
43 264 from the ocular surface at normal rates, it is from a reduced aqueous tear pool. Tear film  
44  
45 265 hyperosmolarity causes hyperosmolarity of the ocular surface epithelial cells and stimulates a  
46  
47  
48 266 cascade of inflammatory events involving MAP kinases and NFkB signaling pathways.<sup>[1]</sup> Therefore,  
49  
50 267 to avoid tear film disruption and possible ocular surface damage,  
51  
52  
53 268 the environmental conditions of dry locations need to be improved or the tear film should be  
54  
55 269 protected against adverse environmental conditions.<sup>[28]</sup> Da Wa as a backland, has lower  
56  
57  
58 270 humidity in the atmosphere, which leads to distinctive dry-eye symptoms, for increasing the  
59  
60

1  
2  
3 271 periocular humidity has a significant positive impact on ocular comfort in patients with dry eye.<sup>[29]</sup>  
4  
5 272 On the other hand, Sayin N, et al. reported that cigarette smoking seems to affect the Schirmer  
6  
7 273 score, TBUT value, and hexagonal cells of the corneal endothelium,<sup>[30]</sup> which supported our  
8  
9  
10 274 results.  
11  
12 275 ~~In addition, DE in the workplace is associated with increasing use of screens and electronic devices~~  
13  
14 276 ~~and environmental conditions in modern office designs and other environments. Also it is affected~~  
15  
16 277 ~~by the occupational exposure to ionizing radiation, chemicals or atmospheric dust with increased~~  
17  
18 278 ~~ocular dryness<sup>[24]</sup>. In addition, it is suggested that high preocular relative humidity protects the~~  
19  
20  
21 279 ~~precorneal tear film against desiccation and airborne chemicals and reduces the development of~~  
22  
23 280 ~~eye irritation by airborne sensory irritants<sup>[25]</sup>. Da Wa as a backland, has lower humidity in the~~  
24  
25  
26 281 ~~atmosphere, which leads to distinctive dry eye symptoms.~~  
27  
28 282 ~~Similar to~~ Uchino M's study that ophthalmic findings revealed short BUT and corneal staining  
29  
30 283 accompanied by normal Schirmer test values,<sup>[31,26]</sup> while, ~~we also~~ found the discrepancy between  
31  
32  
33 284 subjective symptoms and clinical findings with the accordance of BUT and Schirmer test in DES<sup>[26]</sup>.  
34  
35 285 Similarly, no consistent relationship was found between common signs and symptoms of DE in the  
36  
37  
38 286 EU and United States. Moreover, symptoms alone are insufficient for the diagnosis and  
39  
40 287 management of DE and argue for a consensus of clinical signs that better reflect all aspects of  
41  
42 288 the disease.<sup>[32]</sup> In the subjects with clinical findings being positive, the subjects with complaints of  
43  
44  
45 289 DE symptoms had less tear secretion volume and lower tear film stability, which suggested the  
46  
47 290 existence of a "latent stage". Sullivan BD, et al. also reported that the initiation and progression  
48  
49  
50 291 of DE is multifactorial and supports the rationale for redefining severity on the basis of a  
51  
52 292 continuum of clinical signs.<sup>[18]</sup> ~~In this study, a~~ According to the severity of the amount of tear  
53  
54 293 secretion and tear film BUT, we tried to rank all subjects: 1. No symptoms without clinical findings;  
55  
56  
57 294 2. The discrepancy between DE symptoms and clinical findings; 3. DE symptoms with clinical  
58  
59  
60

1  
2 295 findings being positive. The rank may represent the lesions progression. Moreover, we should pay  
3  
4 296 more attention to the discrepancy stage (2), which are tended to be ignored.

5  
6 297 It was widely considered that the increase in age is closely related to the severity of the DE  
7  
8 298 symptoms. Recently, it has been reported that DE is prevalent among young to middle-aged  
9  
10 299 Japanese visual display terminal users. Increased risk for DED was noted in women aged over 30  
11  
12 300 years. <sup>[3126]</sup> In this survey, we found that the age was not a risk factor for DE symptoms in all  
13  
14 301 subjectssamples, which may be due to the discrepancy, but there was a significant difference in the  
15  
16 302 subjects with clinical findings being positive.

17  
18 303 As therapy strategies, we need to treat both signs and symptoms of the discrepancy subjects,  
19  
20 304 because in this stage, Schirmer II test and BUT have already decreased, compared with the normal  
21  
22 305 subjects in the present study. But we often ignore these conditions in clinics, due to the lack of  
23  
24 306 symptoms or clinical findings. Currently, artificial tear emulsion may be an effective way to treat  
25  
26 307 the signs and symptoms of DE in meibomian gland dysfunction (MGD) cases<sup>[3327]</sup>. On the other  
27  
28 308 hand, Barabino S et al<sup>[3428]</sup> reported that the combination of hyaluronic acid and tamarind seed  
29  
30 309 polysaccharide also could improve the symptoms of DE effectively.

31  
32 310 Even so, the study had some limitations. For example, we did not test tears osmotic pressure in  
33  
34 311 the diagnostic protocol, and did not evaluate the ocular surface or the meibomian glands.~~analyze~~  
35  
36 312 ~~the BMI and myocardial infarction or angina risk factors, as reported by Uchino M<sup>[26]</sup>~~. This study  
37  
38 313 also lacked of the other objective tests evaluating ocular surface. These will be improved in our  
39  
40 314 future study.

41  
42 315 Our study suggested that there were so many potential DES without any symptoms. The  
43  
44 316 occupations of the population in this study are mainly farmers, so we should pay more attention  
45  
46 317 to the special group. In addition, it is necessary to screen in those outpatients with inducing  
47  
48 318 factors, and future interventions should focus on the discrepancy patients. Similarly, the  
49  
50 319 Diagnostic Methodology Subcommittee also concluded that the administration of a structured  
51  
52  
53  
54  
55  
56  
57  
58  
59  
60

1  
2 320 questionnaire to patients presenting to a clinic provides an excellent opportunity for screening  
3  
4 321 patients with potential dry eye disease.<sup>[194]</sup>  
5

6 322 In conclusion, DES is a multi-stage disease related to multi-factors, and influencing factors of DE  
7  
8 323 symptoms included gender, smoking, environment as well as age. It is of great importance to make  
9  
10 324 the progression of the disease clear, put forward the pre-clinical phase concept and recognize the  
11  
12 325 discrepancy, which may contribute to the prevention, diagnosis and treatment.  
13  
14

15  
16 326 There is no financial Support and any conflict of interest for this study.  
17

### 18 327 **Authors' contributions**

19  
20 328 Study concept and design: LC and RH. Acquisition of data: RH and YDH. Analysis and interpretation  
21  
22 329 of data: RH YDH and LC. Drafting of the manuscript: RH and KY. Critical revision of the manuscript  
23  
24 330 for important intellectual content: LC. All authors read and approved the final manuscript.  
25  
26

### 27 331 **Acknowledgments**

28  
29 332 This work was supported in part by Dr Lei Liu, Dr Yizhou Sun and Dr Jun Chen in the follow-up in  
30  
31 333 Department of Ophthalmology, First Hospital of China Medical University.  
32  
33  
34  
35  
36  
37  
38  
39  
40  
41  
42  
43  
44  
45  
46  
47  
48  
49  
50  
51  
52  
53  
54  
55  
56  
57  
58  
59  
60

## REFERENCES

1. [The definition and classification of dry eye disease: report of the Definition and Classification Subcommittee of the International Dry Eye WorkShop \(2007\). Ocul Surf.2007;5\(2\):75-92.](#) ~~Temp MA. Report of the national eye institute / industry workshop on clinical trials in dry eyes CLAO J. 1995; 21(4):221-232.~~
2. Posa A, Sel S, Dietz R, Sander R, Bräuer L, Paulsen F. Updated Incidence of Dry Eye Syndrome in Germany. *Klin Monbl Augenheilkd.* 2014; 231(1):42-46.
3. [Lee HS, Ji YS, Yoon KC. Efficacy of Hypotonic 0.18% Sodium Hyaluronate Eye Drops in Patients With Dry Eye Disease. Cornea. 2014 Jun 9. \[Epub ahead of print\]](#)
43. Oleňik A. Effectiveness and tolerability of dietary supplementation with a combination of omega-3 polyunsaturated fatty acids and antioxidants in the treatment of dry eye symptoms: results of a prospective study. *Clin Ophthalmol.* 2014; 8:169-176.
54. ~~Bron AJ~~ [Bron AJ](#). Diagnosis of dry eye. *Surv Ophthalmol.* 2001; 45 Suppl 2:S221-226.
65. Perry HD. Dry eye disease: pathophysiology, classification, and diagnosis. *Am J Manag Care.* 2008; 14:S79-87.
76. Jie Y, Xu L, Wu YY, Jonas JB. Prevalence of dry eye among adult Chinese in the Beijing Eye Study. *Eye (Lond).* 2009; 23:688-693.
87. Labbé A, Wang YX, Jie Y, Baudouin C, Jonas JB, Xu L. Dry eye disease, dry eye symptoms and depression: the Beijing Eye Study. *Br J Ophthalmol.* 2013; 97(11):1399-1403.
98. Onwubiko SN, Eze BI, Udeh NN, Arinze OC, Onwasigwe EN, Umeh RE. Dry eye disease: Prevalence, distribution and determinants in a hospital-based population. *Cont Lens Anterior Eye.*

- 1  
2 370 2013; pii: S1367-0484(13)00279-8.
- 3  
4 371 [109. van Landingham SW, West SK, Akpek EK, Muñoz B, Ramulu PY. Impact of dry eye on reading in](#)  
5  
6 372 [a population based sample of the elderly: the Salisbury Eye Evaluation. Br J Ophthalmol. 2013; doi:](#)  
7  
8 373 [10.1136/bjophthalmol-2013-303518.](#)
- 9  
10  
11 374 [11. Gulati A, Sullivan R, Buring JE, Sullivan DA, Dana R, Schaumberg DA. Validation and](#)  
12  
13 375 [repeatability of a short questionnaire for dry eye syndrome. Am J Ophthalmol. 2006; 142:125–131.](#)
- 14  
15  
16 376 [12. Uchino M, Nishiwaki Y, Michikawa T, Shirakawa K, Kuwahara E, Yamada M, Dogru M,](#)  
17  
18 377 [Schaumberg DA, Kawakita T, Takebayashi T, Tsubota K. Prevalence and risk factors of dry eye](#)  
19  
20 378 [disease in Japan: Koumi study. Ophthalmology.2011; 118:2361-2367.](#)
- 21  
22  
23 379 [13. Zhang Mei, Chen Jiaqi, Liu Zhuguo. The diagnosis of dry eye syndrome. Chinese Journal of](#)  
24  
25 380 [Practical Ophthalmology. 2000; 18: 664-668.](#)
- 26  
27  
28 381 [14. Kaštelan S, Tomić M, Salopek-Rabatić J, Novak B. Diagnostic Procedures and Management of Dry](#)  
29  
30 382 [Eye. Biomed Res Int 2013;309723.](#)
- 31  
32  
33 383 [15. Sweeney DF, Millar TJ, Raju SR. Tear film stability: A review. Exp Eye Res. 2013; 117:28-38.](#)
- 34  
35  
36 384 [16. Baudouin C, Aragona P, Messmer EM, Tomlinson A, Calonge M, Boboridis KG, Akova YA,](#)  
37  
38 385 [Geerling G, Labetoulle M, Rolando M. Role of hyperosmolarity in the pathogenesis and](#)  
39  
40 386 [management of dry eye disease: proceedings of the OCEAN group meeting. Ocul Surf. 2013;](#)  
41  
42 387 [11\(4\):246-258.](#)
- 43  
44  
45 388 [17. Sullivan BD, Crews LA, Sönmez B, de la Paz MF, Comert E, Charoenrook V, de Araujo AL,](#)  
46  
47 389 [Pepose JS, Berg MS, Kosheleff VP, Lemp MA. Clinical utility of objective tests for dry eye disease:](#)  
48  
49 390 [variability over time and implications for clinical trials and disease management. Cornea.](#)  
50  
51 391 [2012;31\(9\):1000-1008.](#)
- 52  
53  
54  
55 392 [18. Sullivan BD, Whitmer D, Nichols KK, Tomlinson A, Foulks GN, Geerling G, Pepose JS,](#)  
56  
57 393 [Kosheleff V, Porreco A, Lemp MA. An objective approach to dry eye disease severity. Invest](#)  
58  
59  
60

- 1  
2 394 [Ophthalmol Vis Sci. 2010;51\(12\):6125-6130.](#)
- 3  
4  
5 395 ~~191.~~ Bron, AJ . Methodologies to diagnose and monitor dry eye disease: report of the Diagnostic  
6  
7 396 Methodology Subcommittee of the International Dry Eye WorkShop (2007). 2007; Ocul Surf  
8  
9  
10 397 5(2):108-152.
- 11  
12 398 ~~2012.~~ Nichols KK, Mitchell GL, Zadnik K. The repeatability of clinical measurements of dry eye.  
13  
14 399 Cornea.2004; 23: 272-285.
- 15  
16  
17 400 ~~13. Gulati A, Sullivan R, Buring JE, Sullivan DA, Dana R, Schaumberg DA. Validation and~~  
18  
19 401 ~~repeatability of a short questionnaire for dry eye syndrome. Am J Ophthalmol. 2006; 142:125-131.~~
- 20  
21 402 ~~14. Uchino M, Nishiwaki Y, Michikawa T, Shirakawa K, Kuwahara E, Yamada M, Dogru M,~~  
22  
23 403 ~~Schaumberg DA, Kawakita T, Takebayashi T, Tsubota K. Prevalence and risk factors of dry eye~~  
24  
25 404 ~~disease in Japan: Koumi study. Ophthalmology.2011; 118:2361-2367.~~
- 26  
27  
28 405 ~~15. Zhang Mei, Chen Jiaqi, Liu Zhuguo. The diagnosis of dry eye syndrome. Chinese Journal of~~  
29  
30 406 ~~Practical Ophthalmology. 2000; 18: 664-668.~~
- 31  
32  
33 407 ~~16. Kaštelan S, Tomić M, Salopek Rabatić J, Novak B. Diagnostic Procedures and Management of Dry~~  
34  
35 408 ~~Eye. Biomed Res Int 2013;309723.~~
- 36  
37  
38 409 ~~17. Sweeney DF, Millar TJ, Raju SR. Tear film stability: A review. Exp Eye Res. 2013; 117:28-38.~~
- 39  
40 410 ~~2118.~~ Schein OD, Tielsch JM, Muñoz B, Bandeen-Roche K, West S. Relation between signs and  
41  
42 411 symptoms of dry eye in the elderly. A population-based perspective. Ophthalmology.1997;  
43  
44 412 104:1395-1401.
- 45  
46  
47 413 ~~2219.~~ Chia EM, Mitchell P, Rochtchina E, Lee AJ, Maroun R, Wang JJ. Prevalence and associations of  
48  
49 414 dry eye syndrome in an older population: the Blue Mountains Eye Study. Clin Experiment  
50  
51 415 Ophthalmol. 2003; 31:229-232
- 52  
53  
54 416 ~~2320.~~ Tamer C, Oksuz H, Sogut S. Androgen status of the nonautoimmune dry eye subtypes.  
55  
56 417 Ophthalmic Res. 2006; 38:280-286.
- 57  
58  
59 418 [24.Peng CC, Cerretani C, Braun RJ, Radke CJ.Evaporation-driven instability of the precorneal tear](#)  
60

- 1  
2 419 [film.Adv Colloid Interface Sci. 2014;206:250-264.](#)  
3  
4 420 [25. Madden LC, Tomlinson A, Simmons PA.Effect of humidity variations in a controlled](#)  
5  
6 421 [environment chamber on tear evaporation after dry eye therapy.Eye Contact Lens.](#)  
7  
8 422 [2013;39\(2\):169-174.](#)  
9  
10  
11 423 [26. López-Miguel A, Tesón M, Martín-Montañez V, Enríquez-de-Salamanca A, Stern ME, Calonge](#)  
12  
13  
14 424 [M, González-García MJ.Dry eye exacerbation in patients exposed to desiccating stress under](#)  
15  
16 425 [controlled environmental conditions.Am J Ophthalmol. 2014;157\(4\):788-798.](#)  
17  
18 426 [27. Tesón M, González-García MJ, López-Miguel A, Enríquez-de-Salamanca A, Martín-Montañez](#)  
19  
20 427 [V, Benito MJ, Mateo ME, Stern ME, Calonge M.Influence of a controlled environment simulating](#)  
21  
22 428 [an in-flight airplane cabin on dry eye disease.Invest Ophthalmol Vis Sci. 2013;54\(3\):2093-2099.](#)  
23  
24  
25 429 [28. Abusharha AA, Pearce EI.The effect of low humidity on the human tear film.Cornea.](#)  
26  
27 430 [2013;32\(4\):429-434.](#)  
28  
29  
30 431 [29. Korb DR, Blackie CA.Using goggles to increase periocular humidity and reduce dry eye](#)  
31  
32 432 [symptoms.Eye Contact Lens. 2013;39\(4\):273-276.](#)  
33  
34 433 [21. Nichols JJ, Ziegler C, Mitchell GL, Nichols KK. Self-reported dry eye disease across refractive](#)  
35  
36 434 [modalities : Invest Ophthalmol Vis Sci. 2005; 46:1911-1914](#)  
37  
38  
39 435 [22. Adatia FA, Michaeli-Cohen A, Naor J, Caffery B, Bookman A, Slomovic A. Correlation between](#)  
40  
41 436 [corneal sensitivity, subjective dry eye symptoms and corneal staining in Sjögren's syndrome. Can J](#)  
42  
43 437 [Ophthalmol. 2004; 39:767-771.](#)  
44  
45  
46 438 [23. Meng ID, Kurose M. The role of corneal afferent neurons in regulating tears under normal and](#)  
47  
48 439 [dry eye conditions. Exp Eye Res.2013; 117:79-87.](#)  
49  
50  
51 440 [24.Vicente Herrero MT, Ramírez Iñiguez de la Torre MV, Terradillos García MJ, López González AA.](#)  
52  
53 441 [Dry eye syndrome. Occupational risk factors, valuation and prevention. Semergen. 2013; pii:](#)  
54  
55 442 [S1138-3593\(13\)00126-3.](#)  
56  
57  
58 443 [25. Wolkoff P, Nøjgaard JK, Franck C, Skov PG. Does the modern office environment desiccate the](#)  
59  
60



1  
2 444 ~~eyes? Ugeskr Laeger. 2006; 168:3893-3896.~~

3  
4 445 [30. Sayin N, Kara N, Pekel G, Altinkaynak H. Effects of chronic smoking on central corneal thickness,](#)  
5  
6 446 [endothelial cell, and dry eye parameters. Cutan Ocul Toxicol. 2013 Oct 22. \[Epub ahead of print\]](#)

7  
8  
9 447 [3126.](#) Uchino M, Yokoi N, Uchino Y, Dogru M, Kawashima M, Komuro A, Sonomura Y, Kato H,  
10  
11 448 Kinoshita S, Schaumberg DA, Tsubota K. Prevalence of Dry Eye Disease and its Risk Factors in Visual  
12  
13 449 Display Terminal Users: The Osaka Study. Am J Ophthalmol. 2013; 156(4):759-766.

14  
15  
16 450 [32. Sullivan BD, Crews LA, Messmer EM, Foulks GN, Nichols KK, Baenninger P, Geerling G,](#)  
17  
18 451 [Figueiredo F, Lemp MA. Correlations between commonly used objective signs and symptoms for](#)  
19  
20 452 [the diagnosis of dry eye disease: clinical implications. Acta Ophthalmol. 2014;92\(2\):161-166.](#)

21  
22  
23 453 [3327.](#) Sindt CW, Foulks GN. Efficacy of an artificial tear emulsion in patients with dry eye associated  
24  
25 454 with meibomian gland dysfunction. Clin Ophthalmol. 2013; 7:1713-1722.

26  
27 455 [3428.](#) Barabino S, Rolando M, Nardi M, Bonini S, Aragona P, Traverso CE. The effect of an artificial  
28  
29 456 tear combining hyaluronic acid and tamarind seeds polysaccharide in patients with moderate dry  
30  
31 457 eye syndrome: a new treatment for dry eye. Eur J Ophthalmol. 2013; 20;24(2):173-178.

32  
33 458

34  
35 459

36  
37 460

38  
39 461

40  
41 462

42  
43 463

44  
45 464

46  
47 465

48  
49 466

50  
51 467

52  
53 468

54  
55 469

56  
57 470

58  
59 471

60

1  
2 469  
3  
4 470  
5  
6  
7 471  
8  
9  
10  
11  
12  
13  
14  
15  
16  
17  
18  
19  
20  
21  
22  
23  
24  
25  
26 472  
27  
28 473  
29  
30 474  
31  
32  
33 475  
34  
35 476  
36  
37 477  
38  
39  
40 478  
41  
42 479  
43  
44 480  
45  
46  
47 481  
48  
49 482  
50  
51  
52 483  
53  
54 484  
55  
56 485  
57  
58  
59 486  
60

**Table 1 Dry eye questionnaire for this survey**

- 
1. Do your eyes ever feel dry?
- 
2. Do your eyes ever have tearing?
  3. Do your eyes ever feel burning?
  4. Do your eyes ever have blurring and fluctuating vision?
  5. Do your eyes ever feel irritation?
  6. Do your eyes ever feel foreign body sensation?
  7. Do your eyes ever feel tired?
- 

Possible answers to the questions were 'none or rarely', 'sometimes', and 'often or all the time'.

The positive symptoms was defined as having 'sometimes' or 'often or all the time'.

1  
2 487  
3  
4 488  
5  
6 489  
7  
8  
9 490  
10  
11 491  
12  
13  
14 492  
15  
16  
17  
18  
19  
20  
21  
22  
23  
24  
25  
26  
27  
28 493  
29  
30 494  
31  
32  
33 495  
34  
35 496  
36  
37 497  
38  
39 498  
40  
41 499  
42  
43 500  
44  
45 501  
46  
47 502  
48  
49 503  
50  
51 504  
52  
53 505  
54  
55 506  
56  
57  
58  
59  
60

**Table 2 Discrepancy between symptoms and clinical findings**

|          |        | Clinical findings |        |       |
|----------|--------|-------------------|--------|-------|
|          |        | DE                | normal | total |
| Symptoms | DE     | 1052              | 658    | 1710  |
|          | normal | 302               | 250    | 552   |
|          | Total  | 1354              | 908    | 2262  |

1  
2  
3  
4  
5  
6  
7  
8  
9  
10  
11  
12  
13  
14  
15  
16  
17  
18  
19  
20  
21  
22  
23  
24  
25  
26  
27  
28  
29  
30  
31  
32  
33  
34  
35  
36  
37  
38  
39  
40  
41  
42  
43  
44  
45  
46  
47  
48  
49  
50  
51  
52  
53  
54  
55  
56  
57  
58  
59  
60

507  
508  
509  
510  
511  
512  
513  
514  
515  
516  
517

**Table 3 Comparison of Schirmer II test and tear film break up time**

| Symptoms    | Clinical findings | Schirmer II test (mm) | BUT (s)         |
|-------------|-------------------|-----------------------|-----------------|
| Normal      | Normal            | 22.0 (2.0-30.0)       | 12.5 (0.0-30.0) |
| Discrepancy |                   | 15.0 (0.0-30.0)       | 9.0 (0.0-30.0)  |
| DE          | DE                | 5.0 (0.0-30.0)        | 4.0 (0.0-20.0)  |

For peer review only

## STROBE Statement—checklist of items that should be included in reports of observational studies

|                              | Item No | Recommendation                                                                                                                                                                                                                                                                                                                                                                                                                                                                                                                                                                                                                                                                                   |
|------------------------------|---------|--------------------------------------------------------------------------------------------------------------------------------------------------------------------------------------------------------------------------------------------------------------------------------------------------------------------------------------------------------------------------------------------------------------------------------------------------------------------------------------------------------------------------------------------------------------------------------------------------------------------------------------------------------------------------------------------------|
| <b>Title and abstract</b>    | √ 1     | (a) Indicate the study's design with a commonly used term in the title or the abstract<br>(b) Provide in the abstract an informative and balanced summary of what was done and what was found                                                                                                                                                                                                                                                                                                                                                                                                                                                                                                    |
| <b>Introduction</b>          |         |                                                                                                                                                                                                                                                                                                                                                                                                                                                                                                                                                                                                                                                                                                  |
| Background/rationale         | √ 2     | Explain the scientific background and rationale for the investigation being reported                                                                                                                                                                                                                                                                                                                                                                                                                                                                                                                                                                                                             |
| Objectives                   | √ 3     | State specific objectives, including any prespecified hypotheses                                                                                                                                                                                                                                                                                                                                                                                                                                                                                                                                                                                                                                 |
| <b>Methods</b>               |         |                                                                                                                                                                                                                                                                                                                                                                                                                                                                                                                                                                                                                                                                                                  |
| Study design                 | √ 4     | Present key elements of study design early in the paper                                                                                                                                                                                                                                                                                                                                                                                                                                                                                                                                                                                                                                          |
| Setting                      | √ 5     | Describe the setting, locations, and relevant dates, including periods of recruitment, exposure, follow-up, and data collection                                                                                                                                                                                                                                                                                                                                                                                                                                                                                                                                                                  |
| Participants                 | √ 6     | (a) <i>Cohort study</i> —Give the eligibility criteria, and the sources and methods of selection of participants. Describe methods of follow-up<br><i>Case-control study</i> —Give the eligibility criteria, and the sources and methods of case ascertainment and control selection. Give the rationale for the choice of cases and controls<br><i>Cross-sectional study</i> —Give the eligibility criteria, and the sources and methods of selection of participants<br>(b) <i>Cohort study</i> —For matched studies, give matching criteria and number of exposed and unexposed<br><i>Case-control study</i> —For matched studies, give matching criteria and the number of controls per case |
| Variables                    | √ 7     | Clearly define all outcomes, exposures, predictors, potential confounders, and effect modifiers. Give diagnostic criteria, if applicable                                                                                                                                                                                                                                                                                                                                                                                                                                                                                                                                                         |
| Data sources/<br>measurement | √ 8*    | For each variable of interest, give sources of data and details of methods of assessment (measurement). Describe comparability of assessment methods if there is more than one group                                                                                                                                                                                                                                                                                                                                                                                                                                                                                                             |
| Bias                         | √ 9     | Describe any efforts to address potential sources of bias                                                                                                                                                                                                                                                                                                                                                                                                                                                                                                                                                                                                                                        |
| Study size                   | √ 10    | Explain how the study size was arrived at                                                                                                                                                                                                                                                                                                                                                                                                                                                                                                                                                                                                                                                        |
| Quantitative variables       | √ 11    | Explain how quantitative variables were handled in the analyses. If applicable, describe which groupings were chosen and why                                                                                                                                                                                                                                                                                                                                                                                                                                                                                                                                                                     |
| Statistical methods          | √ 12    | (a) Describe all statistical methods, including those used to control for confounding<br>(b) Describe any methods used to examine subgroups and interactions<br>(c) Explain how missing data were addressed<br>(d) <i>Cohort study</i> —If applicable, explain how loss to follow-up was addressed<br><i>Case-control study</i> —If applicable, explain how matching of cases and controls was addressed<br><i>Cross-sectional study</i> —If applicable, describe analytical methods taking account of sampling strategy<br>(e) Describe any sensitivity analyses                                                                                                                                |

Continued on next page

1  
2  
3  
4  
5  
6  
7  
8  
9  
10  
11  
12  
13  
14  
15  
16  
17  
18  
19  
20  
21  
22  
23  
24  
25  
26  
27  
28  
29  
30  
31  
32  
33  
34  
35  
36  
37  
38  
39  
40  
41  
42  
43  
44  
45  
46  
47  
48  
49  
50  
51  
52  
53  
54  
55  
56  
57  
58  
59  
60

## Results

|                  |          |                                                                                                                                                                                                                                                                                                                                                                                                               |
|------------------|----------|---------------------------------------------------------------------------------------------------------------------------------------------------------------------------------------------------------------------------------------------------------------------------------------------------------------------------------------------------------------------------------------------------------------|
| Participants     | √<br>13* | (a) Report numbers of individuals at each stage of study—eg numbers potentially eligible, examined for eligibility, confirmed eligible, included in the study, completing follow-up, and analysed<br>(b) Give reasons for non-participation at each stage<br>(c) Consider use of a flow diagram                                                                                                               |
| Descriptive data | √<br>14* | (a) Give characteristics of study participants (eg demographic, clinical, social) and information on exposures and potential confounders<br>(b) Indicate number of participants with missing data for each variable of interest<br>(c) <i>Cohort study</i> —Summarise follow-up time (eg, average and total amount)                                                                                           |
| Outcome data     | √<br>15* | <i>Cohort study</i> —Report numbers of outcome events or summary measures over time<br><i>Case-control study</i> —Report numbers in each exposure category, or summary measures of exposure<br><i>Cross-sectional study</i> —Report numbers of outcome events or summary measures                                                                                                                             |
| Main results     | √<br>16  | (a) Give unadjusted estimates and, if applicable, confounder-adjusted estimates and their precision (eg, 95% confidence interval). Make clear which confounders were adjusted for and why they were included<br>(b) Report category boundaries when continuous variables were categorized<br>(c) If relevant, consider translating estimates of relative risk into absolute risk for a meaningful time period |
| Other analyses   | √<br>17  | Report other analyses done—eg analyses of subgroups and interactions, and sensitivity analyses                                                                                                                                                                                                                                                                                                                |

## Discussion

|                  |         |                                                                                                                                                                            |
|------------------|---------|----------------------------------------------------------------------------------------------------------------------------------------------------------------------------|
| Key results      | √<br>18 | Summarise key results with reference to study objectives                                                                                                                   |
| Limitations      | √<br>19 | Discuss limitations of the study, taking into account sources of potential bias or imprecision. Discuss both direction and magnitude of any potential bias                 |
| Interpretation   | √<br>20 | Give a cautious overall interpretation of results considering objectives, limitations, multiplicity of analyses, results from similar studies, and other relevant evidence |
| Generalisability | √<br>21 | Discuss the generalisability (external validity) of the study results                                                                                                      |

## Other information

|         |         |                                                                                                                                                               |
|---------|---------|---------------------------------------------------------------------------------------------------------------------------------------------------------------|
| Funding | √<br>22 | Give the source of funding and the role of the funders for the present study and, if applicable, for the original study on which the present article is based |
|---------|---------|---------------------------------------------------------------------------------------------------------------------------------------------------------------|

\*Give information separately for cases and controls in case-control studies and, if applicable, for exposed and unexposed groups in cohort and cross-sectional studies.

**Note:** An Explanation and Elaboration article discusses each checklist item and gives methodological background and published examples of transparent reporting. The STROBE checklist is best used in conjunction with this article (freely available on the Web sites of PLoS Medicine at <http://www.plosmedicine.org/>, Annals of Internal Medicine at <http://www.annals.org/>, and Epidemiology at <http://www.epidem.com/>). Information on the STROBE Initiative is available at [www.strobe-statement.org](http://www.strobe-statement.org).

# BMJ Open

## The discrepancy between the subjectively reported symptoms and objectively measured clinical findings in dry eye: a population based analysis

|                                 |                                                                                                                                                                                                                                                                                                         |
|---------------------------------|---------------------------------------------------------------------------------------------------------------------------------------------------------------------------------------------------------------------------------------------------------------------------------------------------------|
| Journal:                        | <i>BMJ Open</i>                                                                                                                                                                                                                                                                                         |
| Manuscript ID:                  | bmjopen-2014-005296.R2                                                                                                                                                                                                                                                                                  |
| Article Type:                   | Research                                                                                                                                                                                                                                                                                                |
| Date Submitted by the Author:   | 29-Jul-2014                                                                                                                                                                                                                                                                                             |
| Complete List of Authors:       | Hua, Rui; First Hospital of China Medical University, Ophthalmology<br>Yao, Kai; Yale University School of Medicine, Ophthalmology and Visual Science<br>Hu, Yuedong; First Hospital of China Medical University, Ophthalmology<br>Chen, Lei; First Hospital of China Medical University, Ophthalmology |
| <b>Primary Subject Heading</b>: | Ophthalmology                                                                                                                                                                                                                                                                                           |
| Secondary Subject Heading:      | Ophthalmology, Epidemiology, Patient-centred medicine                                                                                                                                                                                                                                                   |
| Keywords:                       | MEDICAL EDUCATION & TRAINING, EPIDEMIOLOGY, OPHTHALMOLOGY, Corneal and external diseases < OPHTHALMOLOGY                                                                                                                                                                                                |
|                                 |                                                                                                                                                                                                                                                                                                         |

SCHOLARONE™  
Manuscripts

1  
2  
3  
4  
5  
6  
7  
8  
9  
10  
11  
12  
13  
14  
15  
16  
17  
18  
19  
20  
21  
22  
23  
24  
25  
26  
27  
28  
29  
30  
31  
32  
33  
34  
35  
36  
37  
38  
39  
40  
41  
42  
43  
44  
45  
46  
47  
48  
49  
50  
51  
52  
53  
54  
55  
56  
57  
58  
59  
60

1 **The discrepancy between the subjectively reported symptoms and objectively measured clinical**  
2 **findings in dry eye: a population based analysis**

3 Rui Hua <sup>1</sup>, Kai Yao<sup>2</sup>, Yuedong Hu<sup>1</sup>, Lei Chen <sup>1,\*</sup>

4 1Department of Ophthalmology, First Hospital of China Medical University, Shenyang, China

5 2 Department of Ophthalmology and Visual Science, Yale University School of Medicine, New

6 Haven, Connecticut 06510, USA

7 \* Corresponding author:

8 Lei Chen

9 Department of Ophthalmology

10 First Hospital of China Medical University,

11 No.155, Nanjingbei Street, Heping District

12 Shenyang, Liaoning Province, People's Republic of China

13 Phone: 0086-13840583355

14 Fax: 0086-24-83282630

15 Email: LeiChen51@126.com

16

17

18

19

20

21

22

23

24



1  
2  
3  
4  
5  
6  
7  
8  
9  
10  
11  
12  
13  
14  
15  
16  
17  
18  
19  
20  
21  
22  
23  
24  
25  
26  
27  
28  
29  
30  
31  
32  
33  
34  
35  
36  
37  
38  
39  
40  
41  
42  
43  
44  
45  
46  
47  
48  
49  
50  
51  
52  
53  
54  
55  
56  
57  
58  
59  
60

25 **Abstract**

26 **Objective:** To investigate the discrepancy between patient-reported symptoms and measured  
27 clinical findings and influencing factors in dry eye (DE).

28 **Setting:** A population-based, cross-sectional study was performed from July-August 2007 in  
29 northeast China. The study was performed on populations originating from two rural districts that  
30 are respectively located approximately 377 km and 177 km from our hospital.

31 **Participants:** A total of 2600 eligible residents from 1300 households were identified, and valid  
32 responses were obtained from 2262 residents, with a mean subject age of 48 (range: 12-88) years  
33 (926 men and 1336 women; response rate, 87%).

34 **Primary Outcome Measures:** The primary outcome variables measured in this study were  
35 patient-reported symptoms of DE, tear film break up time (BUT) and Schirmer scores (Schirmer II).

36 **Results:** Subjects with normal BUT and Schirmer scores without any DE symptoms were defined as  
37 the control group. Subjects presenting with abnormal BUT and Schirmers scores and symptoms of  
38 DE were defined as the DE group. Finally, subjects presenting with disparities between the  
39 occurrence of DE symptoms and measured clinical findings, were regarded as the discrepancy. Out  
40 of 2262 subjects, the discrepant group contained 960 subjects (42.44%) with significant difference  
41 ( $\chi^2=4.027$ ,  $p = 0.045 < 0.05$ ). We found that the factors that influenced the subjective reporting of  
42 DE symptoms included gender, smoking status, environment and age. Finally, Schirmer II test and  
43 tear film BUT values were found to be remarkably different amongst control, DE, and discrepant  
44 groups.

45 **Conclusion:** The development of DE can be related to many factors. It is of great importance to put  
46 forward the pre-clinical phase concept (patients who are symptomatic for DE and yet show no  
47 aqueous deficiency or evaporative signs) and to screen outpatients with DE-inducing features.  
48 Future interventions should focus on patients demonstrating a discrepancy between self-reported  
49 symptomology and measured clinical findings.

1  
2  
3  
4  
5  
6  
7  
8  
9  
10  
11  
12  
13  
14  
15  
16  
17  
18  
19  
20  
21  
22  
23  
24  
25  
26  
27  
28  
29  
30  
31  
32  
33  
34  
35  
36  
37  
38  
39  
40  
41  
42  
43  
44  
45  
46  
47  
48  
49  
50  
51  
52  
53  
54  
55  
56  
57  
58  
59  
60

**Keywords:** discrepancy; dry eye syndrome; subjective symptoms; Schirmer I test; break up time

For peer review only

1  
2 75 **Strengths and limitations of this study**  
3

4 76 To our knowledge, this is the first report describing the discrepancy between subjective symptoms  
5  
6 77 and objectively measured clinical findings in dry eye in a large Chinese patient sample.  
7

8  
9 78 Large-scale, population-based dry eye epidemiologic studies on this discrepancy have been limited  
10  
11 79 in China.  
12

13 80 Our study supports results produced by the Diagnostic Methodology Subcommittee, which  
14  
15 81 demonstrated that the administration of a structured questionnaire to patients at the time of  
16  
17 82 presentation to the clinic provides an excellent opportunity to screen for patients suffering from  
18  
19 83 potential dry eye disease.  
20  
21

22  
23 84 Tear osmotic pressure (tear osmolarity) was not measured in our diagnostic protocol.  
24

25 85 Our protocol also excluded some of the other known clinical tests for evaluating the ocular  
26  
27 86 surface.  
28  
29

30 87  
31

32 88  
33

34 89  
35  
36

37 90  
38

39 91  
40

41 92  
42  
43

44 93  
45

46 94  
47

48 95  
49

50 96  
51

52 97  
53

54 98  
55

56 99  
57  
58  
59  
60

**INTRODUCTION**

Dry eye (DE) is a disorder affecting the tear ducts and ocular surface, which can be caused by many factors, and which produces symptoms including ocular discomfort, visual disturbances, and tear film instability. DE can also lead to potential damage of the ocular surface and is accompanied by both increased tear film osmolarity and inflammation of the ocular surface<sup>[1]</sup>. Despite these considerations, the diagnosis of DE is frequently overlooked in the clinic and has not yet been widely accepted in China. When clinically identifying DE, in addition to primary auxiliary examinations, including measurement of visual acuity, external examination, and slit-lamp biomicroscopy,<sup>[2]</sup> further diagnostic tests should be performed to evaluate the extent of ocular surface damage (e.g., staining with rose bengal, lissamine green, or fluorescein dye), tear film instability (e.g., tear breakup time (BUT) test), and the aqueous tear flow (e.g., schirmer test)<sup>[3]</sup> of a given patient. It has recently been reported that DE symptoms, as evaluated subjectively in patient questionnaires, occurs in approximately 21% of the adult population within China. Furthermore, it was found that psychological depression is associated with DE, particularly in aging patient populations from Beijing<sup>[4,5]</sup>. Although population-based survey studies of DE have been performed globally,<sup>[6,7]</sup> the nature of this disorder has not been well documented within Chinese populations. Therefore, we performed the present survey to examine the lack of correlation between the subjective presentation of DE symptoms, and two objective clinical tests of DE, within selected Chinese patient groups. Additionally, we analysed the correlation of smoking and environmental humidity to the incidence of DE.

**METHODS**

A population-based, cross-sectional study was performed on patients living in northeast China from July to August, 2007. The study was carried out in two rural districts, Zhuanghe and Dawa, which are located approximately 377 km and 177 km from our hospital, respectively. The Zhuanghe district is located near the Bohai Sea, while the Dawa district is inland. The majority of

1  
2 125 inhabitants from either district work as farmers. All of the people living in these communities were  
3  
4 126 officially registered by name, gender, and age through the local government, ensuring that the  
5  
6 127 boundaries and population density of each community were known at the beginning of the study.  
7  
8  
9 128 Home visits were performed according to these registration lists. All of the enrolled subjects were  
10  
11 129 aged 12 and over and were selected via cluster sampling. Subject choices were confirmed by  
12  
13 130 door-to-door visitation. Residents were deemed ineligible and excluded from study for reasons  
14  
15  
16 131 including death, moving out of town, nursing, or hospitalisation. A total of 2600 eligible residents  
17  
18 132 from 1300 households were identified, and valid responses were obtained from 2262 residents,  
19  
20  
21 133 with a mean age of 48 (range: 12-88) years (926 men and 1336 women; response rate, 87%). If a  
22  
23 134 subject was unwilling to join the study, or did not receive all the tests outlined in our diagnostic  
24  
25 135 protocol, an invalid response was recorded. Subjects with a documented history of ocular surface  
26  
27  
28 136 disease, such as keratitis or conjunctivitis, were excluded. Additionally, subjects were excluded if  
29  
30 137 such lesions were detected via slit lamp (Su Zhou SIX-SIX Technological Development Co., Ltd,  
31  
32 138 China) during initial visitation. After answering a self-administered questionnaire distributed by  
33  
34  
35 139 the investigators, all of the eligible subjects from the same community were then brought to a  
36  
37 140 central location for clinical investigation. All the experiments and measurements adhered to the  
38  
39 141 ethical principles of the Declaration of Helsinki and were approved by the Medical Research Ethics  
40  
41  
42 142 Committee of the First Hospital of China Medical University. Written informed consent was  
43  
44 143 obtained from all participants.

45  
46 144 All subjects were first required to complete a questionnaire survey about epidemiological  
47  
48 145 investigation (the clinic); following this, their tear secretion volumes and tear film BUT values were  
49  
50  
51 146 recorded.

52  
53 147 We evaluated DE symptoms using the 7 questions developed and validated by Gulati A et al.<sup>[4,8,9]</sup>,  
54  
55 148 which focus on ocular discomforts including awareness, tearing, burning, blurring and fluctuating  
56  
57  
58 149 vision, irritation, foreign body sensation, and tired eyes (Table 1). Those subjects who identified a  
59  
60

1  
2 150 minimum of 3 out of 7 questions as positive were considered “symptom positive.” Smoking status  
3  
4 151 was also recorded. The above data were jointly recorded by two investigators (RH, YDH) during in  
5  
6 152 home interviews of prospective subjects.  
7

8  
9 153 BUT: To avoid any interference, the BUT was performed prior to other DE tests. Fluorescein filter  
10  
11 154 paper (Tianjin Jingming New Technological Development Co., Ltd, China) was moisturised and  
12  
13 155 placed on the eye to coat the lower temporal side of the bulbar conjunctiva. The subjects were  
14  
15  
16 156 advised to blink several times to ensure that the corneal surface became evenly coated with 2%  
17  
18 157 fluorescein. Then, tear film stability was measured using a slit lamp equipped with a cobalt blue  
19  
20  
21 158 filter to record the time elapsed from the last complete blink to the appearance of the first  
22  
23 159 random dry spot. The slit lamp and filter were standardised across the studies.  
24

25  
26 160 Schirmer test: To avoid ocular irritation caused by the test strip from interfering with other  
27  
28 161 examinations, the Schirmer’s test was the final test performed during patient evaluation. Tear  
29  
30 162 secretion test filter paper (Tianjin Jingming New Technological Development Co., Ltd, China)  
31  
32 163 measuring 35 mm in length, with a bend at 5 mm, was used. At one minute following the  
33  
34 164 application of topical anaesthesia (20 ml:80 mg, oxybuprocaine hydrochloride eye drops, Santan,  
35  
36 165 Japan), the filter paper was placed at the junction of the medial  $\frac{2}{3}$  and lateral  $\frac{1}{3}$  of the lower lid  
37  
38  
39 166 in the fornix. In addition, the test was carried out under dim illumination and standardised  
40  
41  
42 167 conditions of temperature and humidity (temperature and humidity were maintained at 20-25°C  
43  
44 168 and 45-65%, respectively). Then, the amount of moisture present on the filter paper was recorded  
45  
46 169 at 5 min after paper application. Afterwards, the subjects were asked to blink normally. Positive  
47  
48  
49 170 clinical findings were defined as a patient having both a Schirmer II test result of less than 10 mm  
50  
51 171 per 5 min and a tear film BUT value of less than 10 s<sup>[10]</sup>. Subjects with normal BUT and Schirmers  
52  
53 172 scores, and without any reported symptoms of DE, were defined as the control group. Subjects  
54  
55  
56 173 with abnormal BUT and Schirmers scores, as well as reported symptoms of DE, were defined as the  
57  
58 174 DE group. Finally, subjects producing inconsistencies between symptom occurrence and clinical  
59  
60

1  
2 175 findings were regarded as the discrepancy.

3  
4 176 All data were analysed using SPSS (version 19.0) and expressed as median values (min-max).

5  
6 177 Regression analysis was performed to adjust for gender, age, smoking status and geographical

7  
8 178 location. The Pearson Chi-square test was used to assess the proportional values between the two

9  
10 179 cohorts, as well as the influencing factors (gender and environment) in subjects with positive

11  
12 180 clinical findings. The influencing factors (age) in those subjects, and the differences in Schirmer I

13  
14 181 test and BUT values were analysed using the Kruskal-Wallis H test. P-values of less than 0.05 were

15  
16 182 considered statistically significant.

17  
18  
19  
20  
21 183 **RESULTS**

22  
23 184 Of the 2262 subjects studied, 1710 subjects presented with symptoms of DE and 1354 subjects had

24  
25 185 low BUT and Schirmers values. Additionally, the discrepant group contained 960 (302+658, 42.44%)

26  
27 186 subjects ,which is significant in statistics (Pearson Chi-square test:  $\chi^2=4.027$ ,  $p = 0.045 < 0.05$ ; Table

28  
29 187 2). Of the 1302 subjects demonstrating consistency between reported symptoms and measured

30  
31 188 clinical findings, 1052 were within the DE group, and the remainder accounted for the control

32  
33 189 group. The sensitivity and specificity of DE identification based on subject symptoms were 77.70%

34  
35 190 (1052/1354) and 27.53% (250/908), respectively, while the accuracy of using the subjects' perceived

36  
37 191 symptoms for DE identification was 57.56% ((1052+250)/2262). Additionally, the positive predictive

38  
39 192 value and likelihood ratios were 61.52% (1052/1710) and 1.072 (77.70%/(1-27.53%)), respectively,

40  
41 193 while the negative predictive value and likelihood ratios were 45.29% (250/552) and 0.810

42  
43 194 ((1-77.70%)/27.53%), respectively.

44  
45 195 Logistic analysis showed that there was no relationship between symptom presentation and

46  
47 196 clinical findings in this study (OR = 1.112,  $p = 0.495 > 0.05$ ). Moreover, gender (OR = 2.059,  $p <$

48  
49 197 0.0001), smoking status (OR = 2.263,  $p < 0.0001$ ), and geographical region (coastal region or inland

50  
51 198 region; OR = 0.272,  $p < 0.0001$ ) were risk factors for subjectively reported DE symptoms, rather

52  
53 199 than age (OR = 1.400,  $p = 0.100 > 0.05$ ).

1  
2 200 Of the 1354 subjects with positive clinical findings, 622 out of 780 (87.12%) female subjects  
3  
4 201 presented with related symptoms, while 390 of 574 (89.51%) males presented with related  
5  
6 202 symptoms. Compared with males, females were more likely to experience symptoms of DE  
7  
8  
9 203 ( $\chi^2=12.193$ ,  $p < 0.0001$ ). Of patients living coastal region, 574 out of 820 (70.00%) subjects  
10  
11 204 presented with DE symptomology, while the percentage of symptomatic patients living inland was  
12  
13 205 89.51% (478 out of 534 subjects). Thus, subjects living inland made up a higher proportion than  
14  
15  
16 206 those living seaside ( $\chi^2=35.528$ ,  $p < 0.0001$ ). Furthermore, significant differences in whether  
17  
18 207 subjects presented with DE symptomology were found to correlate with patient age ( $Z=1.983$ ,  $p=$   
19  
20  
21 208  $0.047 < 0.05$ ).

22  
23 209 There were remarkable differences in the values obtained for Schirmer II testing and tear film BUT  
24  
25 210 among our three study groups (Schirmer II test:  $\chi^2=422.93$ ,  $p < 0.0001$ ; BUT:  $\chi^2=264.85$ ,  $p < 0.0001$ ;  
26  
27  
28 211 Table 3).

## 29 30 212 **DISCUSSION**

31  
32 213 DE or dysfunctional tear syndrome is one of the most frequent diagnoses in the practice of  
33  
34 214 ophthalmology. Risk factors for the syndrome include age, sex (female gender), race, use of contact  
35  
36 215 lenses, environmental conditions of low humidity, systemic medications, and autoimmune  
37  
38 216 disorders<sup>[11]</sup>.

39  
40  
41 217 Tear film components contain meibomian lipids, ocular mucins and proteins. Tear film stability can  
42  
43 218 be assessed via a number of approaches developed for clinical as well as research purposes,  
44  
45 219 including evaluation of tear break-up time and non-invasive break-time, topographic and  
46  
47 220 interferometric techniques, confocal microscopic methods, aberrometry, and visual function  
48  
49 221 tests<sup>[12]</sup>. In the present study, Schirmer II testing and BUT were performed. It is widely accepted  
50  
51 222 that measurements of tear hyperosmolarity are the “gold standard” for diagnosing DE, <sup>[2]</sup> as DE  
52  
53 223 leads to cell apoptosis in the conjunctiva and cornea and triggers inflammatory cascades that  
54  
55 224 contribute to further cell death, including the loss of mucin-producing goblet cells, which  
56  
57  
58  
59  
60



1  
2 225 exacerbates tear film instability.<sup>[13]</sup> However, such approaches are difficult to perform under the  
3  
4 226 conditions of epidemiological investigation. Alternatively, BUT is also considered a top choice in  
5  
6 227 clinical testing, as it also measures the mechanisms discussed above with good overall accuracy,<sup>[14]</sup>  
7  
8 228 and appears to be more repeatable across patient visits than many other diagnostic tests.<sup>[15]</sup> As a  
9  
10 229 result, BUT is a more suitable choice for epidemiological investigation.

11  
12  
13 230 The number of patients comprising the discrepant group, those who did not report DE  
14  
15 231 symptomology, was 42.44%. With the positive and negative likelihood ratio values both being close  
16  
17 232 to 1 (1.072 and 0.810, respectively), it was found that the possibility of correctly identifying DE  
18  
19 233 based on symptomology alone is equivalent to the possibility of incorrectly identifying it.

20  
21  
22 234 Similarly, Schein OD<sup>[16]</sup> concluded that there exists distinct differences between the chief  
23  
24 235 symptomatic complaints of patients and lab results, making it difficult to distinguish such lesions.

25  
26 236 To our knowledge, there are several reasons behind the disparities found between subjective  
27  
28 237 self-reporting and the measured clinical findings that are vital to performing routine clinical work.

29  
30 238 First, there are gender differences. Chia EM et al. reported that women have a higher tendency to  
31  
32 239 develop symptomatic DE. This finding may be associated with gender-related hormone levels,<sup>[17]</sup> as  
33  
34 240 the androgen pool of non-autoimmune DE patients with Meibomian glands malfunctions (MGD) is  
35  
36 241 significantly depleted compared with that of non-MGD and control cases<sup>[18]</sup>. Our findings agree  
37  
38 242 with the Chia study that female gender is a risk factor for DE.

39  
40 243 Second, environmental conditions play an important role in the development of DE. For example,  
41  
42 244 locally elevated evaporation rates lead to hyperosmolar spots within the tear film and subsequent  
43  
44 245 vulnerability to epithelial irritation. In addition to evaporation rates, tear film instability depends  
45  
46 246 on the strength of healing flow from the neighbouring regions of the eye that lie outside the  
47  
48 247 breakup region.<sup>[19]</sup> Many DE patients are sensitive to adverse environments, where tear  
49  
50 248 evaporation rates (TER) increase due to a reverse correlation when environmental humidity is in  
51  
52  
53  
54  
55  
56  
57  
58  
59  
60

1  
2 249 the range of 5% to 70%. In fact, TER is reduced to zero at 70% relative humidity.<sup>[20]</sup> Additionally,  
3  
4 250 adult patients exhibiting mild-to-moderate DE and asymptomatic subjects of similar ages can both  
5  
6  
7 251 experience acute exacerbation of the disorder following exposure to a controlled desiccating  
8  
9  
10 252 environment (5% relative humidity) for 2 hours.<sup>[21]</sup> Dawa, being an inland location, generally has  
11  
12 253 lower atmospheric humidity which leads to distinctive DE symptomology, as increasing  
13  
14 254 periocular humidity has been demonstrated to have a significant positive impact on ocular comfort  
15  
16  
17 255 in DE patients.<sup>[22]</sup> Additionally, Sayin N, et al. reported that cigarette smoking appears to affect  
18  
19  
20 256 Schirmer score values, TBUT values, and the hexagonal cells of the corneal endothelium,<sup>[23]</sup> which  
21  
22 257 further supports our results.  
23  
24  
25 258 The lack of correlation between objective clinical findings and subjective symptomatic reporting is  
26  
27 259 not an uncommon one. For example, early detection of glaucoma is often difficult as it is  
28  
29  
30 260 frequently asymptomatic during the initial stages of the disease. Thus, studies have shown that the  
31  
32 261 majority of glaucoma cases are not diagnosed until later stage disease progression has occurred.<sup>[24]</sup>  
33  
34  
35 262 In a study performed by Uchino M, ophthalmic findings revealed short BUT and corneal staining  
36  
37 263 accompanied by normal Schirmer test values,<sup>[25]</sup> while we found a discrepancy in DE between  
38  
39  
40 264 subjective symptom reporting and measured clinical findings with regard to BUT and Schirmer test  
41  
42 265 values. Similarly, no consistent relationship was found between self-reported symptoms of DE and  
43  
44  
45 266 objectively measured clinical findings in the EU and United States. As symptomology alone is  
46  
47  
48 267 insufficient for the diagnosis and management of DE, it is arguable that a consensus  
49  
50 268 of clinical signs is needed to better reflect all aspects of the disease.<sup>[26]</sup> Thus, a combined test and  
51  
52  
53 269 set criteria for diagnosis and differentiation of DE is important towards improving future DE  
54  
55  
56 270 research. Additionally, in subjects producing positive clinical findings, symptomatic complaints of  
57  
58 271 DE were found to be accompanied by reduced tear secretion volumes and lower tear film stability  
59  
60

1  
2  
3 272 values, which suggests the existence of a “latent stage” in DE. Sullivan BD, et al. also reported that  
4  
5 273 the initiation and progression of DE is multifactorial, which further supports the rationale for  
6  
7 274 redefining DE severity on the basis of a continuum of clinical symptoms.<sup>[27]</sup> In this study, we  
8  
9  
10 275 ranked all subjects according to the severity of the reduction in tear secretion and tear film BUT  
11  
12 276 values. Subjects were classified as having: 1. No presentation of symptoms or measured clinical  
13  
14  
15 277 findings; 2. Disparity between DE symptom presentation and positive or negative measured clinical  
16  
17 278 findings; and, 3. Symptomatic of DE with positive measured clinical findings.  
18  
19 279 Future longitudinal studies will be necessary to follow DE lesion progression in asymptomatic  
20  
21 280 subjects. Furthermore, more attention needs to be devoted towards following subjects that  
22  
23 281 present with a discrepancy between symptomatic reporting and measured clinical findings – a  
24  
25 282 group which has historically been disregarded in DE research.  
26  
27  
28 283 It was widely accepted that increasing subject age is closely related to the severity of the DE  
29  
30 284 symptomology. It has recently been reported that DE is prevalent among young to middle-aged  
31  
32 285 Japanese subjects who use visual display terminals. An increased DE risk was also noted in women  
33  
34 286 aged over 30 years.<sup>[25]</sup> In this survey, age was not found to be a risk factor for symptomatic DE  
35  
36 287 across all subjects; however, in subjects with positive clinical findings, we found that subject age  
37  
38 288 did correlate significantly with whether there was a presence of DE symptomology. We suggest  
39  
40 289 that this may be influenced by the inclusion of the discrepant group in our analyses.  
41  
42  
43 290 Our study did include some inherent limitations. For example, we did not test tear osmotic  
44  
45 291 pressure in our diagnostic protocol, and did not directly evaluate the ocular surface or the  
46  
47 292 meibomian glands. Our protocol also lacked some of the additional objective tests that can be  
48  
49 293 used to evaluate the ocular surface. These limitations will be addressed in future studies.  
50  
51  
52 294 Our findings suggest that there are many subjects that potentially suffer from DE despite a lack of  
53  
54 295 reported symptomology. The population examined in this study was comprised mainly of farmers,  
55  
56  
57  
58  
59  
60

1  
2 296 which suggests that more attention should be paid to this special group. Additionally, it is  
3  
4 297 necessary to screen those outpatients possessing DE inducing factors, and future interventions  
5  
6 298 should focus on patients demonstrating discrepancies between symptomology and measured  
7  
8  
9 299 clinical findings. Similarly, the Diagnostic Methodology Subcommittee also concluded that the  
10  
11 300 administration of a structured questionnaire to patients presenting to the clinic provides an  
12  
13 301 excellent opportunity for screening patients with potential DE disease.<sup>[14]</sup>

14  
15  
16 302 In conclusion, the causes of DE are multi-factorial, and factors that influence the severity of DE  
17  
18 303 symptomology include gender, smoking, environment and age. Moving forward, it is of great  
19  
20 304 importance to make the progression of DE clear, to put forward the pre-clinical phase concept and  
21  
22 305 to recognise the discrepancies found in many subjects, all of which may contribute favourably to  
23  
24 306 the prevention, diagnosis and treatment of DE.

#### 25 26 27 28 307 **Acknowledgments**

29  
30 308 This work was supported in part by Dr. Lei Liu, Dr. Yizhou Sun, and Dr. Jun Chen of the Department  
31  
32 309 of Ophthalmology, First Hospital of China Medical University. We also thank the American Journal  
33  
34 310 Experts (AJE) for assisting in the preparation of this manuscript.

#### 35 36 37 311 **Contributorship statement**

38  
39 312 Study concept and design: LC and RH. Acquisition of data: RH and YDH. Analysis and interpretation  
40  
41 313 of data: RH YDH and LC. Drafting of the manuscript: RH and KY. Critical revision of the manuscript  
42  
43 314 for intellectual content: LC. All authors have read and approved of the final manuscript.

#### 44 45 46 315 **Competing interests**

47  
48  
49 316 There were no conflicts of financial interest for this study.

#### 50 51 317 **Funding**

52  
53 318 This research received no specific grant from any funding agency in the public, commercial or  
54  
55 319 not-for-profit sectors.

#### 56 57 58 59 320 **Data sharing statement**

1  
2 321 No additional data are available.  
3  
4 322  
5  
6 323  
7  
8 324  
9  
10 325  
11  
12 326  
13  
14 327  
15  
16 328  
17  
18 329  
19  
20 330  
21  
22 331  
23  
24 332  
25  
26 333  
27  
28 334  
29  
30 335  
31  
32 336  
33  
34 337  
35  
36 338  
37  
38 339  
39  
40 340  
41  
42 341  
43  
44 342  
45  
46 343  
47  
48 344  
49  
50 345  
51  
52  
53  
54  
55  
56  
57  
58  
59  
60

For peer review only

346 **REFERENCES**

- 347 1. The definition and classification of dry eye disease: report of the Definition and Classification  
348 Subcommittee of the International Dry Eye WorkShop (2007). *Ocul Surf.*2007;5(2):75-92.
- 349 2. Bron AJ. Diagnosis of dry eye. *Surv Ophthalmol.* 2001; 45 Suppl 2:S221-226.
- 350 3. Perry HD. Dry eye disease: pathophysiology, classification, and diagnosis. *Am J Manag Care.* 2008;  
351 14:S79-87.
- 352 4. Jie Y, Xu L, Wu YY, Jonas JB. Prevalence of dry eye among adult Chinese in the Beijing Eye Study.  
353 *Eye (Lond).* 2009; 23:688-693.
- 354 5. Labbé A, Wang YX, Jie Y, et al. Dry eye disease, dry eye symptoms and depression: the Beijing Eye  
355 Study. *Br J Ophthalmol.* 2013; 97(11):1399-1403.
- 356 6. Onwubiko SN, Eze BI, Udeh NN, et al. Dry eye disease: Prevalence, distribution and  
357 determinants in a hospital-based population. *Cont Lens Anterior Eye.* 2013; pii:  
358 S1367-0484(13)00279-8.
- 359 7. van Landingham SW, West SK, Akpek EK, et al. Impact of dry eye on reading in a population  
360 based sample of the elderly: the Salisbury Eye Evaluation. *Br J Ophthalmol.* 2013; doi:  
361 10.1136/bjophthalmol-2013-303518.
- 362 8. Gulati A, Sullivan R, Buring JE, et al. Validation and repeatability of a short questionnaire for dry  
363 eye syndrome. *Am J Ophthalmol.* 2006; 142:125–131.
- 364 9. Uchino M, Nishiwaki Y, Michikawa T, et al. Prevalence and risk factors of dry eye disease in  
365 Japan: Koumi study. *Ophthalmology.*2011; 118:2361-2367.
- 366 10. Zhang Mei, Chen Jiaqi, Liu Zhuguo. The diagnosis of dry eye syndrome. *Chinese Journal of*  
367 *Practical Ophthalmology.* 2000; 18: 664-668.
- 368 11. Kaštelan S, Tomić M, Salopek-Rabatić J, et al. Diagnostic Procedures and Management of Dry  
369 Eye. *Biomed Res Int* 2013:309723.
- 370 12. Sweeney DF, Millar TJ, Raju SR. Tear film stability: A review. *Exp Eye Res.* 2013; 117:28-38.

- 1  
2  
3 371 13. Baudouin C, Aragona P, Messmer EM, et al. Role of hyperosmolarity in the pathogenesis and  
4  
5 372 management of dry eye disease: proceedings of the OCEAN group meeting. *Ocul Surf*. 2013;  
6  
7 373 11(4):246-258.  
8  
9  
10 374 14. Bron, AJ . Methodologies to diagnose and monitor dry eye disease: report of the Diagnostic  
11  
12 375 Methodology Subcommittee of the International Dry Eye WorkShop (2007). 2007; *Ocul Surf*  
13  
14 376 5(2):108-152.  
15  
16 377 15. Nichols KK, Mitchell GL, Zadnik K. The repeatability of clinical measurements of dry eye.  
17  
18 378 *Cornea*.2004; 23: 272-285.  
19  
20  
21 379 16. Schein OD, Tielsch JM, Munõz B, et al. Relation between signs and symptoms of dry eye in the  
22  
23 380 elderly. A population-based perspective. *Ophthalmology*.1997; 104:1395-1401.  
24  
25  
26 381 17. Chia EM, Mitchell P, Rochtchina E, et al. Prevalence and associations of dry eye syndrome in an  
27  
28 382 older population: the Blue Mountains Eye Study. *Clin Experiment Ophthalmol*. 2003; 31:229-232  
29  
30  
31 383 18. Tamer C, Oksuz H, Sogut S. Androgen status of the nonautoimmune dry eye subtypes.  
32  
33 384 *Ophthalmic Res*. 2006; 38:280-286.  
34  
35  
36 385 19. Peng CC, Cerretani C, Braun RJ, et al. Evaporation-driven instability of the precorneal tear  
37  
38 386 film. *Adv Colloid Interface Sci*. 2014;206:250-264.  
39  
40  
41 387 20. Madden LC, Tomlinson A, Simmons PA. Effect of humidity variations in a controlled environment  
42  
43 388 chamber on tear evaporation after dry eye therapy. *Eye Contact Lens*. 2013;39(2):169-174.  
44  
45  
46 389 21. López-Miguel A, Tesón M, Martín-Montañez V, et al. Dry eye exacerbation in patients exposed  
47  
48 390 to desiccating stress under controlled environmental conditions. *Am J Ophthalmol*.  
49  
50  
51 391 2014;157(4):788-798.  
52  
53  
54 392 22. Korb DR, Blackie CA. Using goggles to increase periocular humidity and reduce dry eye  
55  
56 393 symptoms. *Eye Contact Lens*. 2013;39(4):273-276.  
57  
58  
59 394 23. Sayin N, Kara N, Pekel G, et al. Effects of chronic smoking on central corneal thickness,  
60

- 1  
2  
3 395 endothelial cell, and dry eye parameters. *Cutan Ocul Toxicol*. 2013 Oct 22. [Epub ahead of print]  
4  
5 396 24. Rewri P, Kakkar M. Awareness, knowledge, and practice: a survey of glaucoma in north Indian  
6  
7 397 rural residents. *Indian J Ophthalmol*. 2014;62(4):482-486.  
8  
9 398 25. Uchino M, Yokoi N, Uchino Y, et al. Prevalence of Dry Eye Disease and its Risk Factors in Visual  
10  
11 399 Display Terminal Users: The Osaka Study. *Am J Ophthalmol*. 2013; 156(4):759-766.  
12  
13  
14 400 26. Sullivan BD, Crews LA, Messmer EM, et al. Correlations between commonly used objective  
15  
16 401 signs and symptoms for the diagnosis of dry eye disease: clinical implications. *Acta Ophthalmol*.  
17  
18 402 2014;92(2):161-166.  
19  
20  
21 403 27. Sullivan BD, Whitmer D, Nichols KK, et al. An objective approach to dry eye disease severity.  
22  
23 404 *Invest Ophthalmol Vis Sci*. 2010;51(12):6125-6130.  
24  
25  
26 405  
27  
28 406  
29  
30  
31 407  
32  
33 408  
34  
35 409  
36  
37 410  
38  
39 411  
40  
41 412  
42  
43  
44

45 **Table 1. Dry eye questionnaire used in this survey.**

- 
- 47 1. Do your eyes ever feel dry?
- 
- 49 2. Do your eyes ever have tearing?
- 51
- 52 3. Do your eyes ever feel burning?
- 53
- 54 4. Do your eyes ever have blurring and fluctuating vision?
- 55
- 56 5. Do your eyes ever feel irritation?
- 57
- 58
- 59
- 60



6. Do your eyes ever feel foreign body sensation?

7. Do your eyes ever feel tired?

Possible answers to the questions were “none or rarely”, “sometimes”, and “often or all the time”.

Positive symptoms were defined by the answers “sometimes” or “often or all the time”.

416

417

418

419

420

421

422

423

424

425

426

427

428

429

430

**Table 2. Reported DE symptoms and clinical findings.**

|          | Clinical findings |      |         |       |
|----------|-------------------|------|---------|-------|
|          |                   | DE   | Control | Total |
| Symptoms | DE                | 1052 | 658     | 1710  |
|          | Control           | 302  | 250     | 552   |

---

Total      1354      908      2262

---

432 \*The discrepant group contained 960 (302+658, 42.44%) subjects ,which is significant in statistics  
 433 (Pearson Chi-square test:  $\chi^2=4.027$ ,  $p = 0.045 < 0.05$ ). The sensitivity and specificity of DE  
 434 identification based on subject symptoms were 77.70% (1052/1354) and 27.53% (250/908),  
 435 respectively, while the accuracy of using the subjects' perceived symptoms for DE identification  
 436 was 57.56% ((1052+250)/2262). The positive predictive value was 61.52% (1052/1710), while the  
 437 negative predictive value was 45.29% (250/552).

438

439

440

441

442

443

444

445

446

447

448

449

450 **Table 3. Primary outcome variables of tear film BUT and Schirmer scores (Schirmer II) among the**  
 451 **subject groups.**

| Symptoms    | Clinical findings | Schirmer II test (mm) | BUT (s)         |
|-------------|-------------------|-----------------------|-----------------|
| Normal      | Normal            | 22.0 (2.0-30.0)       | 12.5 (0.0-30.0) |
| Discrepancy |                   | 15.0 (0.0-30.0)       | 9.0 (0.0-30.0)  |

1  
2 DE DE 5.0 (0.0-30.0) 4.0 (0.0-20.0)  
3

---

4 452 \*There were remarkable differences in the values obtained for Schirmer II testing and tear film BUT  
5  
6 453 among our three study groups (Schirmer II test:  $\chi^2=422.93$ ,  $p<0.0001$ ; BUT:  $\chi^2=264.85$ ,  $p<0.0001$ ).  
7  
8  
9  
10  
11  
12  
13  
14  
15  
16  
17  
18  
19  
20  
21  
22  
23  
24  
25  
26  
27  
28  
29  
30  
31  
32  
33  
34  
35  
36  
37  
38  
39  
40  
41  
42  
43  
44  
45  
46  
47  
48  
49  
50  
51  
52  
53  
54  
55  
56  
57  
58  
59  
60

For peer review only

1  
2 1 | The discrepancy between **the** **subjectively reported** symptoms and **objectively measured** clinical  
3  
4 2 | findings in dry eye **syndrome**: a population based analysis  
5  
6

7 3 Rui Hua <sup>1</sup>, Kai Yao<sup>2</sup>, Yuedong Hu<sup>1</sup>, Lei Chen <sup>1,\*</sup>  
8

9  
10 4 1Department of Ophthalmology, First Hospital of China Medical University, Shenyang, China  
11

12 5 2 Department of Ophthalmology and Visual Science, Yale University School of Medicine, New  
13

14 6 Haven, Connecticut 06510, [USA](#)  
15  
16

17 7 \* Corresponding author:  
18

19 8 Lei Chen  
20

21 9 Department of Ophthalmology  
22  
23

24 10 First Hospital of China Medical University,  
25  
26

27 11 No.155, Nanjingbei Street, Heping District  
28  
29

30 12 Shenyang, Liaoning Province, People's Republic of China  
31

32 13 Phone: 0086-13840583355  
33  
34

35 14 Fax: 0086-24-83282630  
36

37 15 Email: LeiChen51@126.com  
38  
39  
40  
41  
42  
43  
44  
45  
46  
47  
48  
49  
50  
51  
52  
53  
54  
55  
56  
57  
58  
59  
60

## Abstract

**Objectives:** To investigate the discrepancy between patient-reported symptoms and measured clinical findings and influencing factors in dry eye (DE).

**Setting:** ~~The study was a~~ population-based ~~and~~, cross-sectional study was performed from July-August 2007 in northeast China ~~performed, during Jul to Aug, 2007. It was carried out~~The study was performed on populations originating from in two rural districts of Zhuanghe and Dawa, two rural districts which that were are respectively respectively located about 3 approximately 3777km km and 1777km km from our hospital respectively, respectively.

**Participants/ARTICIPANTS:** ~~—~~A total of 2600 eligible residents from 1300 households were identified, and valid responses were obtained from 2262 residents, with ~~the a~~ mean subject age of 48 (range: 12-88) years (926 men and 1336 women; response rate, 87%). ~~The subjects with the disagreement between the occurrence of symptoms and clinical findings, was regarded to the discrepancy.~~

**Primary/RIMARY Outcome/UTCOME Measures/EASURES:** ~~†~~The primary outcome variables measured in this study were patient-reported signs/symptoms of DE, tear film break up time (BUT) and Schirmer scores (Schirmer II). All subjects received examinations of the amount of lacrimal secretion (Schirmer II) and tear film break up time (BUT) and completed a questionnaire survey about subjective symptoms.

**Results:** ~~—~~We defined the sSubjects with normal BUT and Schirmers scores, but without any DE symptoms, were defined as the normal/control group. And if the sSubjects with presenting with both abnormal BUT and Schirmers scores, as well as and DE signs/symptoms of DE, they were considered defined as the DE group was labeled. And then/Finally, the subjects with the disagreement presenting with disparities between the occurrence of DE signs/symptoms and measured clinical findings, were regarded to as the discrepancy. In Out of 2262 subjects, ~~the the~~ discrepancy group contained 960 subjects (42.44%) with significant difference ( $\chi^2=4.027$ ,  $p =$

0.045 < 0.05). ~~In addition, We found that the influencing factors for that influenced the subjective~~  
~~subjective reporting of DE~~ symptoms included gender, smoking status, environment and age.  
~~Moreover Finally, the~~ Schirmer II test and tear film BUT values were found to be demonstrated  
~~remarkably difference different amongst the normal control, DE, and discrepant group, the~~  
~~discrepancy, and the DE group.s. subjects with both DE symptoms and positive clinical findings.~~

**Conclusion:** ~~DE The development of DE is can be a multi-stage disease~~ related to many  
~~DE~~ factors. It is of great importance to put forward the pre-clinical phase concept (~~the~~ patients who  
~~have sign~~ symptoms of are symptomatic for dry eye DE and yet show no aqueous deficiency or  
evaporative signs), ~~and to~~ and to screen ~~in those~~ outpatients with inducing DE-inducing  
factors/features, ~~and~~ future interventions should focus on the discrepancy patients  
demonstrating a discrepancy between self-reported symptomology and measured clinical findings.

**Keywords:** discrepancy; dry eye syndrome; subjective symptoms; Schirmer I test; break up time;

#### Strengths and limitations of this study

To our knowledge, this is the first report ~~on describing~~ the discrepancy between subjective  
symptoms and objectively measured clinical findings in dry eye ~~syndrome~~ in a large Chinese  
patient sample.

Large-scale ~~and,~~ population-based dry eye epidemiologic studies on ~~the this~~ discrepancy are have  
been limited in China.

Our study ~~supported~~ supports the results ~~of produced by~~ the Diagnostic Methodology  
Subcommittee, ~~that~~ which demonstrated that the administration of a structured questionnaire to  
patients ~~presenting at the time of presentation to a the~~ clinic provides an excellent opportunity ~~for~~  
to screen for patients with suffering from potential dry eye disease.

1  
2 74 | ~~We did not test t~~ears osmotic pressure (tear osmolarity) was not measured in ~~the our~~ diagnostic  
3  
4 75 | protocol.

5  
6 76 | ~~This study~~Our protocol also ~~lacked~~excluded some of the other ~~objective~~known clinical tests for  
7  
8 77 | evaluating the ocular surface.  
9  
10  
11 78 |  
12  
13 79 |  
14  
15 80 |  
16  
17 81 |  
18  
19 82 |  
20  
21 83 |  
22  
23 84 |  
24  
25 85 |  
26  
27 86 |  
28  
29 87 |  
30  
31 88 |  
32  
33 89 |  
34  
35 90 |  
36  
37 91 |  
38  
39 92 |  
40  
41  
42  
43  
44  
45

## 93 INTRODUCTION

46  
47  
48  
49 94 | Dry eye (DE) is a ~~multifactorial disease~~order of affecting the tear ~~ducts~~ and ocular surface, which  
50  
51 95 | can be caused by multi-many factors, and leading~~which produces to that results in~~  
52  
53 96 | ~~signs~~symptoms ~~symptoms~~ of including ocular discomfort, visual disturbances, and tear film  
54  
55 97 | instability. ~~DE with~~ can also lead to potential damage ~~to of~~ the ocular surface. ~~It, and is~~ and is  
56  
57 98 | accompanied by both the increased ~~osmolarity of the~~ tear film osmolarity and inflammation of the  
58  
59  
60

1  
2 99 ocular surface<sup>[1]</sup>. Posa A et al<sup>[2]</sup> reported that the risk factors of those questioned DE outpatients  
3  
4 100 were 40 years of age or older (88%), female (59%) and described a variety of subjective symptoms  
5  
6 101 (65%) in Germany. Compared with isotonic 0.1% Sodium Hyaluronate eye drops, hypotonic 0.18%  
7  
8 102 Sodium Hyaluronate eye drops were reported to be effective in improving tear film stability and  
9  
10 103 ocular surface integrity in patients with mild DE.<sup>[3]</sup> In addition, dietary supplementation with a  
11  
12 104 combination of omega 3 essential fatty acids and antioxidants was proved to be an  
13  
14 105 effective treatment for dry eye symptoms.<sup>[4]</sup> ~~At present~~ Despite these considerations, the  
15  
16 106 diagnosis of dry eye DE is frequently often ignored in overlooked in the clinics and ~~the concept~~ has  
17  
18 107 not yet been widely accepted in China ~~as well~~. When clinically identifying DE, in addition to the  
19  
20 108 primary auxiliary examinations, including measurement of visual acuity, external examination, as  
21  
22 109 well as and slit-lamp biomicroscopy ~~(Su Zhou SIX SIX Technological Development Co., Ltd,~~  
23  
24 110 ~~China),~~<sup>[25]</sup> further diagnostic tests should be performed to assess evaluate the extent of ocular  
25  
26 111 surface damage (e.g., staining with rose bengal, lissamine green, or fluorescein dye), tear film  
27  
28 112 instability (e.g., tear breakup time (BUT) test), as well as and the aqueous tear flow (e.g., schirmer  
29  
30 113 test)<sup>[36]</sup> of a given patient. It has ~~been recently been~~ reported that ~~the~~ DE symptoms, as evaluated  
31  
32 114 subjectively in a patient questionnaires, ~~occurred occurs~~ in about 2 approximately 21% of the the  
33  
34 115 adult population within China, ~~and the authors also found that~~ Furthermore, it was found that  
35  
36 116 psychological the depression was is associated with DE, in particularly when the sign symptoms  
37  
38 117 occurred in an older aging patient populations from Beijing recently<sup>[47,58]</sup>. Although there are many  
39  
40 118 population-based survey studies of dry eye DE in the world have been performed globally,<sup>[69,740]</sup> ~~it~~  
41  
42 119 has not the nature of this disorder has not been well documented there are few in within Chinese  
43  
44 120 populationsa. We t Therefore, we ~~Therefore we~~ carried out conducted Although there are so many  
45  
46 121 population based survey of such condition,<sup>[9,10]</sup> large scale and population based dry eye  
47  
48 122 epidemiologic studies on the discrepancy are limited in China. So we conducted performed an  
49  
50 123 extensive survey the present survey in order to to determine examine the lack of correlation  
51  
52  
53  
54  
55  
56  
57  
58  
59  
60



1  
2 124 between the subjective presentation of DE signsymptoms,ymptoms and two objective clinical  
3  
4 125 tests of DE, within selected Chinese patient groups. In additionAdditionally, Secondly we and  
5  
6 126 analyzeanalysed the associationcorrelation of smoking and environmental humidity into the  
7  
8  
9 127 incidence of dry eyeDE-as well.

## 11 128 METHODS

12  
13 129 The study wasA population-based, and cross-sectional study was performed performedon  
14  
15 130 patients living in northeast China conducted, during from July to August, 2007. It-The study was  
16  
17 131 carried out in two rural districts, of Zhuanghe and Dawa, which were-are located about  
18  
19 132 approximately 377km km and 177km km from our hospital respectively, respectively.  
20  
21 133 EspeciallyIn particular, tThe Zhuanghe district is located near the Bohai Sea, while the Dawa  
22  
23 134 district in-is inland. The majority of the inhabitants fromin both-either districts were-work as  
24  
25 135 farmers. All of the people living in these communities were-iswere officially registered by-withby  
26  
27 136 name, gender, and age at-through the local government's office, which-ensuringed that the  
28  
29 137 boundaryies of the communities and the-size-of-the population sizedensity of each of the  
30  
31 138 communityies were known beforeat the beginning of the start-of-the the study-started. Home  
32  
33 139 visits ss wasere performed according to these registration lists, and-a self-administered  
34  
35 140 questionnaire was distributed. All of the enrolled subjects were aged 12 and over, and-or older  
36  
37 141 were and were selected by-via cluster sampling, and-Subject choices were confirmed by  
38  
39 142 door-to-door visitation. Excluding After iReligible residents were deemed ineligible and excluded  
40  
41 143 from study population owingduefor reasons including-to death, moving out of the town, nursing,  
42  
43 144 or hospitalization. aAA total of 2600 eligible residents from 1300 households were identified,  
44  
45 145 and the valid responses were obtained from 2262 residents, with the-a mean age of 48 (range:  
46  
47 146 12-88) years (926 men and 1336 women; response rate, 87%). If the-a subject was unwilling to join  
48  
49 147 this-the study, or did not receive all the tests outlined in our diagnostic protocol, one-an invalid  
50  
51 148 response was recorded. The-sSubjects who had clearwith a documented history records aboutof

1  
2 149 ocular surface disease, ~~history~~ such as keratitis or conjunctivitis, were excluded.  
3  
4 150 ~~Besides~~ ~~Also, Additionally,~~ the subjects were excluded if ~~these such~~ lesions were detected ~~by the~~ via  
5  
6 151 slit lamp (Su Zhou SIX-SIX Technological Development Co., Ltd, China) ~~at the scene~~ during initial  
7  
8 152 ~~visitation,~~ the corresponding subjects were excluded too. ~~With~~ After answering a self-administered  
9  
10 153 ~~questionnaire distributed by the investigators, all of the the~~ eligible subjects from the same  
11  
12 154 ~~community were afterwards then required to~~ brought to a central location ~~And then, a~~  
13  
14 155 ~~self-administered questionnaire was distributed to the eligible subjects by the investigators. Next,~~  
15  
16 156 ~~The~~ eligible subjects were requested to ~~come to a certain room for clinical investigation in each~~  
17  
18 157 ~~community with these blank questionnaires for investigation.~~ All the ~~research experiments~~ and  
19  
20 158 measurements adhered to the ~~tenets~~ ethical principles of the Declaration of Helsinki, ~~and the~~  
21  
22 159 ~~study was~~ and werewas approved by the Medical Research Ethics Committee of the First  
23  
24 160 Hospital of China Medical University. Written informed consent was obtained from all participants.  
25  
26 161 All subjects were first required to ~~do~~ fill out complete a questionnaire survey at the scene of  
27  
28 162 ~~the~~ about epidemiological investigation (the clinic) firstly, and then following this, their amount of  
29  
30 163 tear secretion volumes and tear film BUT values were recorded ~~at the scene of the epidemiological~~  
31  
32 164 investigation.  
33  
34 165 We evaluated dry eye DE symptoms using the ~~following~~ 7 questions developed and validated by  
35  
36 166 Gulati A et al. <sup>[47,811,912]</sup> ~~, which focus on The survey emphasized related~~ ocular discomforts,  
37  
38 167 including awareness, tearing, burning, blurring and fluctuating vision, irritation, foreign body  
39  
40 168 sensation, ~~as well as~~ and tired eyes (Table 1). Those subjects who identified a minimum of 3 out of  
41  
42 169 7 questions as positive were ~~labelled as~~ considered "symptom positive." ~~Additionally, s~~ Smoking  
43  
44 170 status was also recorded. ~~These~~ The above data were ~~was data were~~ jointly recorded by two  
45  
46 171 investigators (RH, YDH) ~~together, who conducted an in house interview of these people during in~~  
47  
48 172 home interviews of prospective subjects.  
49  
50 173 BUT: To avoid any interference, the BUT was performed before prior to other DE tests. Fluorescein  
51  
52  
53  
54  
55  
56  
57  
58  
59  
60

1  
2 174 filter paper (Tianjin Jingming New Technological Development Co., Ltd, China) was ~~wetted~~  
3  
4 175 ~~moisturized and~~ placed on the eye ~~in order to~~ ~~smear~~ ~~coated~~ in the lower temporal side  
5  
6 176 of the bulbar conjunctiva. The subjects were advised to blink several times ~~in order to~~ ~~smear~~  
7  
8 177 ~~make sure the~~ ~~at the corneal surface~~ ~~became evenly~~ ~~of cornea-coated~~ ~~coated evenly with the~~ 2%  
9  
10 178 fluorescein ~~on the surface of cornea evenly~~. Then, tear film stability was measured ~~by using a slit~~  
11  
12 179 ~~lamp equipped with a cobalt blue filter, in order to~~ recording the time interval elapsed between  
13  
14 180 from the last complete blink ~~to and~~ the appearance of the first random dry spot ~~through, using~~  
15  
16 181 ~~The cobalt blue filter of slit lamp and filter which were standardized in all across the studies. We~~  
17  
18 182 ~~used standardized slit lamps at all visits. It is necessary to ensure the standardization of the~~  
19  
20 183 ~~equipments. For example, the same type slit lamps should be used.~~  
21  
22  
23 184 Schirmer-I test: To avoid ~~the~~ ocular irritation caused by the test strip from interfering with ~~to~~ other  
24  
25 185 examinations, ~~by from the test strip,~~ the Schirmer's test was the final test performed ~~at the~~  
26  
27 186 ~~end~~ during patient evaluation. Tear secretion test filter paper (Tianjin Jingming New Technological  
28  
29 187 Development Co., Ltd, China) measuring 35mm mm in length, with a bend at 55mm mm, was  
30  
31 188 used. ~~At o~~ One minute ~~after following the application of~~ topical ~~anesthesia~~ anaesthesia (200m  
32  
33 189 ml:800m mg, oxybuprocaine hydrochloride eye drops, ~~santan~~ Santan, Japan), the filter paper was  
34  
35 190 placed at the junction of the medial 2/3 and lateral 1/3 of the lower lid in the fornix. In addition, the  
36  
37 191 test was carried out ~~in under~~ dim illumination and ~~under~~ standardized conditions of temperature  
38  
39 192 and humidity (temperature and humidity were maintained at 20-25°C and 45-65%, respectively).  
40  
41 193 ~~For example, the indoor temperature and humidity should be kept by air condition at 20-25°C, and~~  
42  
43 194 ~~45%-65% by air condition respectively. Then~~ ~~Then~~ ~~Following this~~ ~~Then~~, the length of wet amount of  
44  
45 195 moisture present on the filter paper ~~wetting~~ was recorded ~~after at~~ 55m min ~~after paper application~~.  
46  
47 196 ~~After that~~ ~~Afterwards,~~ the subjects were asked to blink normally. ~~the subjects were requested to~~  
48  
49 197 ~~keep their eyes open. The definition of p~~ Positive clinical findings in our study were defined as a  
50  
51 198 patient having both a: both s Schirmer II test result of was less than 100mm mm per 55m min and a  
52  
53  
54  
55  
56  
57  
58  
59  
60

1  
2 199 tear film BUT value was of less than 10 s<sup>[103]</sup>. ~~We defined the s~~Subjects with normal BUT and  
3  
4 200 Schirmers scores, ~~but and without any reported symptoms of DE, signs as were~~ considered defined  
5  
6 201 as normal group the control group. ~~And if T~~he sSubjects ~~with with both~~ abnormal BUT and  
7  
8 202 Schirmers scores, ~~as well as reported symptoms of DE signs, the DE group was labeled~~ were  
9  
10 203 labelled defined as the ~~as~~ DE group. ~~And then~~ Finally, the ~~s~~subjects ~~with the~~ producing  
11  
12 204 disagreement in consistencies ~~between the~~ symptom occurrence ~~of signs~~ and clinical findings, ~~was~~  
13  
14 205 were regarded to as the discrepancy. ~~The subjects with the disagreement between the occurrence~~  
15  
16 206 of symptoms and clinical findings, was regarded to the discrepancy.  
17  
18 207 All ~~data~~ analyses were analyze analysed performed by in using SPSS (version 19.0). ~~and~~ The data  
19  
20 208 ~~were~~ expressed as ~~the~~ median values (min-max). Regression analysis was performed to adjust for  
21  
22 209 gender, age, smoking status and geographical geographical region location. The Pearson Chi-square  
23  
24 210 test was used to assess the proportions proportional values for between the two cohorts, as well  
25  
26 211 as the influencing factors (gender and environment) in ~~the~~ subjects with positive clinical findings  
27  
28 212 statistically. The influencing factors (age) in those subjects, and the differences in Schirmer I test  
29  
30 213 and BUT values were analyze analyse by using the Kruskal--Wallis H test. A probability (p) P-values  
31  
32 214 of of ~~less than 0.05~~ was were considered statistically significant.

## 215 RESULTS

216 Of the 2262 subjects studied, 1710 subjects had sign symptoms presented with symptoms of DE and  
217 1354 subjects had low BUT and Schirmers values Schrimers. Additionally, the discrepant ey group  
218 contained 960 (302+658, 42.44%) subjects (42.44%), which is significant in statistics with significant  
219 proportion difference (Pearson Chi-square test:  $\chi^2=4.027$ ,  $p = 0.045 < 0.05$ ) (; Table 2). Of the  
220 1302 subjects with the demonstrating consistency between reported sign symptoms and measured  
221 clinical findings Of the 1302 subjects with both symptoms and clinical findings being positive, 1052  
222 are were within the DE group, positive and and others are the remainder accounted for the  
223 normal control group negative. The sensitivity and specificity of DE identification based on subjects

224 ~~to subject~~ symptoms ~~for DE identification~~ were 77.70% (1052/1354) and 27.53% ~~respectively~~  
 225 (250/908), ~~respectively~~, while the accuracy of ~~subjects' signs~~ subject ~~the subjects' perceived~~  
 226 ~~symptomology~~ perception ~~for DE identification~~ ~~to disease~~ was 57.56% ((1052+250)/2262). ~~In~~  
 227 ~~addition~~ Additionally, the positive predictive value and likelihood ratios were 61.52% (1052/1710)  
 228 ~~and~~ 1.072 (77.70%/(1-27.53%)), ~~respectively~~, ~~and while the~~ negative ~~ones~~ predictive value and  
 229 likelihood ratios were 45.29% (250/552) ~~and~~, 0.810 ((1-77.70%)/27.53%),  
 230 ~~correspondingly~~ respectively.  
 231 Logistic analysis showed that there was no relationship between ~~sign~~ symptom  
 232 presentation and clinical findings in this study (OR = 1.112, p = 0.495 > 0.05). Moreover, gender  
 233 (OR = 2.059, p < 0.0001), smoking status (OR = 2.263, p < 0.0001), and geographical region (coastal  
 234 region ~~seaside and or backland~~ inland region) (; OR = 0.272, p < 0.0001) were risk factors for  
 235 subjectively reported DE ~~subjective symptom~~ signs ~~symptoms~~, ~~other~~ ~~rather~~ ~~as well as~~ than age (OR  
 236 = 1.400, p = 0.100 > 0.05).  
 237 ~~For~~ ~~Of~~ the 1354 subjects with positive clinical findings ~~being positive~~, 622 out of 780 (87.12%)  
 238 ~~females~~ ~~female subjects~~ ~~had presented with~~ related symptoms; while, 390 of 574 (89.51%) males  
 239 ~~had presented with~~ related symptoms. Compared with males, females were more likely to  
 240 ~~show~~ experience symptoms of DE ~~symptoms~~ signs ( $\chi^2=12.193$ , p < 0.0001). ~~At the same time~~ ~~Of~~  
 241 patients living coastal region ~~seaside~~, ~~there were~~ 574 out of 820 (70.00%) subjects ~~with~~ presented  
 242 with DE sign ~~symptoms~~ living in the ~~seaside~~ symptomology. ~~while~~ ~~On the contrary~~, the  
 243 ~~percentage~~ ~~number~~ of symptomatic patients living ~~that in~~ backland inland was 89.51% (478 out of  
 244 534 ~~(89.51%)~~ subjects). Thus, subjects ~~of living~~ backland inland ~~took~~ made up a higher proportion  
 245 than ~~that of~~ ~~ose~~ living seaside ( $\chi^2=35.528$ , p < 0.0001). ~~Moreover~~ Furthermore, significant  
 246 differences in whether subjects presented with DE symptomology were found to correlate with  
 247 patient age ~~showed significant difference on whether there was DE sign~~ symptoms or not (Z=1.983,  
 248 P = 0.047 < 0.05).

249 ~~There were remarkable differences in the~~ While values obtained for Schirmer II testing and tear  
 250 film BUT ~~demonstrated remarkable difference among these~~ our three study ~~between the normal~~  
 251 ~~groups, the discrepancy, and the subjects with both DE symptoms and positive clinical findings~~  
 252 (Schirmer ~~II~~ test:  $\chi^2=422.93$ ,  $p<0.0001$ ; BUT:  $\chi^2=264.85$ ,  $p<0.0001$ ; Table 3) ~~(Table 3)~~.

## 253 DISCUSSION

254 DE or dysfunctional tear syndrome is one of the most frequent diagnoses in the practice of  
 255 ophthalmology. ~~Its~~ Risk factors for the syndrome include age, sex (female gender), race, use of  
 256 contact ~~lens wear~~ lenses, environmental conditions ~~with of~~ low humidity, systemic medications,  
 257 and autoimmune disorders<sup>[14]</sup>.

258 Tear film components ~~include~~ contain ~~are composed of~~ meibomian lipids, ocular mucins and  
 259 proteins, ~~and its~~ Tear film stability can be assessed via a number of approaches ~~developed~~ tools  
 260 ~~designed~~ for clinical as well as research purposes, including evaluation of tear break-up time and  
 261 non-invasive break-time; topographic and interferometric techniques; confocal microscopic  
 262 methods; aberrometry; and visual function tests<sup>[25]</sup>. In the present study, Schirmer II testing and  
 263 BUT were performed. ~~As we know,~~ It is widely accepted that ~~the~~ measurements of tear  
 264 hyperosmolarity ~~could be regarded as~~ are the “gold standard” for diagnosing DE, diagnosis<sup>[25]</sup>  
 265 ~~because as it~~ DE leads to cell apoptosis ~~ingives rise to the apoptosis of cells of~~ the conjunctiva and  
 266 cornea, and triggers inflammatory cascades that contribute to further cell death, including the loss  
 267 of mucin-producing goblet cells, which ~~exacerbating~~ exacerbates tear film instability.<sup>[136]</sup> Sullivan  
 268 ~~BD, et al reported that tear film osmolarity had the lowest variability among commonly used signs~~  
 269 ~~of DE, and reductions in osmolarity preceded changes in symptoms during a 3-month therapy.~~<sup>[17]</sup>  
 270 ~~In addition, tear film osmolarity was proved to be the single best marker of disease severity across~~  
 271 ~~normal, mild/moderate, and severe DE.~~<sup>[18]</sup> However, it is difficult ~~hard to carry out on~~ such an  
 272 approach es are difficult to perform under the conditions of epidemiological investigation ~~condition~~.  
 273 Alternatively, BUT is also considered as the best top choice in clinical testing, ~~because as~~ it also

1  
2 274 ~~to also~~ measures ~~the~~<sup>this</sup> mechanisms ~~mentioned-discussed~~ above, ~~which with has~~ good overall  
3  
4 275 accuracy,<sup>[149]</sup> and appears to be more repeatable ~~across patient visits (varies less from visit to visit)~~  
5  
6 276 than many other diagnostic tests.<sup>[1529]</sup> As a result, BUT is a more suitable choice for epidemiological  
7  
8  
9 277 investigation.

10  
11 278 The numbers of patients comprising the discrepant group, those who did not report ~~are insensitive~~  
12  
13 279 ~~to the dry eye DE symptoms-signs/symptomology, with the discrepancy being is was~~ 42.44%. With the  
14  
15 280 ~~the~~ positive and negative likelihood ratio values both being close to 1 being (1.072 and 0.810  
16  
17 281 ~~respectively 0, respectively), (both close to 1), it is indicated was found~~ that the possibilities  
18  
19 282 possibility of correctly evaluating-identifying the disease-DE based on symptomology alone from  
20  
21 283 sign/symptoms both correctly and wrongly are basically the same with each other is equivalent to  
22  
23 284 the possibility of incorrectly identifying it.

24  
25 285 Similarly, ~~as proved by~~ Schein OD<sup>[1624]</sup>, ~~it was~~ concluded that there ~~existed~~ exists distinguished  
26  
27 286 distinct differences between the chief symptomatic complaints of patients and ~~the~~ lab studies  
28  
29 287 results ~~-, making it so it seemed~~ difficult to distinguish such lesions ~~apparently~~. To our knowledge,  
30  
31 288 there are several reasons ~~for the behind the discrepancy-disparities found between-between~~  
32  
33 289 subjective sign/symptoms/subjective self-reporting and the clinical findings/measured clinical findings,  
34  
35 290 which that seems so are important to our vital to performing routine clinical work.

36  
37 291 First, there ~~is~~ are gender differences. Chia EM et al. ~~insisted-reported~~ that women have a higher  
38  
39 292 tendency to show-develop the dry eye sign/symptom/symptomatic DE, which This finding may be  
40  
41 293 ~~related to~~ associated with the gender-related hormone levels,<sup>[1722]</sup> as the androgen pool of  
42  
43 294 non-autoimmune dry eye DE patients with Meibomian glands malfunctions (MGD) is significantly  
44  
45 295 depleted compared with that of non-MGD and control cases<sup>[1823]</sup>. Our findings agree with the Chia  
46  
47 296 study and that female sex/gender is a risk factor for DE. This supported our study. In the present  
48  
49 297 study, females were more likely to show DE symptoms.

1  
2  
3 298 Secondly, ~~the~~ environmental al conditions plays an important role in the development of DE.  
4  
5 299 ~~Predicted roles of environmental conditions, such as wind speed and relative humidity, on tear film~~  
6  
7 300 ~~stability agree with clinical observations. More importantly, For example, locally elevated~~  
8  
9  
10 301 evaporation rates leads to hyperosmolar spots within the tear film and, ~~hence,~~ subsequent  
11  
12 302 vulnerability to epithelial irritation. In addition to evaporation rates, tear-film instability depends  
13  
14  
15 303 on the strength of healing flow from the ~~neighboring~~ neighbouring regions of the eye that lie  
16  
17 304 outside the breakup region,<sup>f [1924]</sup>. Many DE patients are sensitive to adverse environments, where  
18  
19  
20 305 tear evaporation rates (TER) increases, due to a reverse correlation  
21  
22 306 with when environmental humidity is in the range of 5% to 70%. In fact, ~~with~~ TER is reduced to  
23  
24  
25 307 zero at 70% relative humidity.<sup>[2025]</sup> ~~In addition~~ Additionally, adult patients ~~with~~ exhibiting  
26  
27 308 mild-to-moderate dry eye DE and asymptomatic subjects of similar ages can both experience  
28  
29 309 acute exacerbation of the disorder, ~~after following exposing~~ exposure to a controlled  
30  
31 310 low humidity desiccating environment (5% relative humidity, ~~desiccating environment~~) for 2  
32  
33  
34  
35 311 hours.<sup>[2126]</sup> ~~Moreover, Tesón M, et al reported that compared with a simulated standard condition~~  
36  
37 312 ~~of 23°C, 45% relative humidity, and 930 millibars of barometric pressure, a simulated in-flight~~  
38  
39 313 ~~condition of 23°C, 5% relative humidity, localized air flow, and 750 millibars will aggravate the~~  
40  
41  
42 314 ~~symptom, the reduction in tear stability and volume.~~<sup>[27]</sup> ~~These environmental conditions causes~~  
43  
44 315 ~~tear hyperosmolarity, because, although the water evaporates from the ocular surface at normal~~  
45  
46 316 ~~rates, it is from a reduced aqueous tear pool. Tear film hyperosmolarity causes hyperosmolarity of~~  
47  
48 317 ~~the ocular surface epithelial cells and stimulates a cascade of inflammatory events involving MAP~~  
49  
50  
51 318 ~~kinases and NFkB signaling pathways.~~<sup>[1]</sup> ~~Therefore, to avoid tear film disruption and possible ocular~~  
52  
53  
54 319 ~~surface damage, the environmental conditions of dry locations need to be improved or the tear~~  
55  
56  
57 320 ~~film should be protected against adverse environmental conditions.~~<sup>[28]</sup> ~~Da~~ W ~~Wa~~ as ~~a~~



1  
2  
3 321 ~~backland~~being an inland location, generally has lower atmospheric humidity ~~in the atmosphere,~~  
4  
5 322 which leads to distinctive ~~dry eye~~DE symptoms~~signs~~symptomology, ~~for as~~ increasing the  
6  
7 323 periocular humidity has been demonstrated to have a significant positive impact on ocular comfort  
8  
9  
10 324 in DE patients ~~with dry eye.~~<sup>[2279]</sup> ~~On the other hand~~Additionally, Sayin N, et al. reported that  
11  
12 325 cigarette smoking ~~seems~~appears to affect ~~the~~ Schirmer score values, TBUT values, and the  
13  
14 326 hexagonal cells of the corneal endothelium,<sup>[23830]</sup> which ~~further supported~~supports our results.  
15  
16  
17 327 The lack of correlation between objective clinical findings and subjective symptomatic reporting is  
18  
19 328 not an uncommon one-issue of signs and symptoms not correlating is not uncommon in many  
20  
21 329 diseases. ~~For example, Early detection of glaucoma is often difficult due to as it is frequently~~  
22  
23 330 asymptomatic course in the during the initial stages of the disease. ~~and~~ Thus, studies have shown  
24  
25 331 that and a large number the majority of glaucoma cases are not diagnosed ~~at~~ until later stage of  
26  
27 332 the disease progression has occurred.<sup>[249]</sup> In a study performed by Uchino M's study, ~~that~~  
28  
29 333 ophthalmic findings revealed short BUT and corneal staining accompanied by normal Schirmer test  
30  
31 334 values,<sup>[253034]</sup> while, we found ~~the a~~ discrepancy in DE between subjective ~~sign~~symptom~~symptom~~  
32  
33 335 reporting and measured clinical findings with ~~the accordance of~~ regard to BUT and Schirmer test ~~in~~  
34  
35 336 DE values. Similarly, no consistent relationship was found between  
36  
37 337 common signs and symptoms of self-reported symptoms of DE and objectively measured clinical  
38  
39 338 findings in the EU and United States. ~~Moreover, signs~~ As symptomology alone ~~are is~~  
40  
41 339 insufficient for the diagnosis and management of DE, it is arguable that ~~and argue for~~ a consensus  
42  
43 340 of clinical signs is needed that to better reflect all aspects of the disease.<sup>[26312]</sup> As a result Thus,  
44  
45 341 having a combined test ~~combination of testing~~ and set criteria for diagnosis and differentiation of  
46  
47 342 DE is an important part towards of the improving ongoing research in dry eye future DE research.  
48  
49 343 Additionally, in the subjects with producing positive clinical ~~findings~~ findings being positive,  
50  
51  
52  
53  
54  
55  
56  
57  
58  
59  
60

1  
2  
3 344 symptomatic the subjects with complaints of DE signsymptoms had were found to be accompanied  
4  
5 345 by less-reduced tear secretion volumes and lower tear film stability values, which suggested-  
6  
7 346 suggests the existence of a “latent stage” in DE. Sullivan BD, et al. also reported that the initiation  
8  
9  
10 347 and progression of DE is multifactorial and, which further supports the rationale for redefining DE  
11  
12 348 severity on the basis of a continuum of clinical signsymptomfindings.<sup>[2748]</sup> In this study, we ranked  
13  
14  
15 349 all subjects according to the severity of the amount of reduction in tear secretion and tear film BUT  
16  
17 350 values, we tried to rank all subject. Subjects were classified as having:s: 1. No  
18  
19  
20 351 signsymptomspresentation of symptoms or without-measured clinical findings; 2. The-  
21  
22 352 discrepancyDisparity between -DE symptoms-signsymptom presentation and positive or negative  
23  
24 353 measured -clinical findings; and, 3. Symptomatic of DE signsymptoms with with positive measured  
25  
26 354 clinical findings being positive.  
27  
28 355 A-fFuture longitudinal studyies wasill be needednecessary to follow DE lesion progression in  
29  
30 356 asymptomatic subjects the symptomless, to see what happens, in order to find out the lesions  
31  
32 357 progression. The rank may represent the lesions progression. MoreoverFurthermore, we should  
33  
34 358 pay more attention needs to be devoted towards following to the subjects that present with a  
35  
36 359 discrepancy subjectsbetween symptomatic reporting and measured clinical findings - a group  
37  
38 360 which has historically been stage (2), which are tended to be ignoreddisregarded in DE research.  
39  
40  
41 361 It was widely consideredaccepted that the-increaseing in-subject age is closely related to the  
42  
43 362 severity of the DE signsymptomsymptomology. Recently, it has recently been reported that DE is  
44  
45 363 prevalent among young to middle-aged Japanese subjects who use visual display terminal userss.  
46  
47 364 An iincreased DE risk for DED was also noted in women aged over 30 years.<sup>[2534]</sup> In this survey,  
48  
49 365 although, we found that the the age was not found to be a risk factor for symptomatic DE  
50  
51 366 signsymptoms in across all subjects; however, but in the subjects with positive clinical findings-being  
52  
53 367 positive, it did show we found that subject age did correlate significantly with whether there was a  
54  
55  
56  
57  
58  
59  
60

1  
2 368 ~~presence of DE symptomology. significant difference on whether there was DE signs or not. The~~  
3  
4 369 ~~authors~~We suggested that this may be ~~due to~~influenced by the inclusion of ~~because of the~~  
5  
6 370 ~~discrepancy~~ subjects group in our analyses. ~~which may be due to the discrepancy, but there was a~~  
7  
8 371 ~~significant difference in the subjects with clinical findings being positive.~~  
9  
10 372 ~~As therapy strategies, we need to treat both signs and symptoms of the discrepancy subjects,~~  
11  
12 373 ~~because in this stage, Schirmer II test and BUT have already decreased, compared with the normal~~  
13  
14 374 ~~subjects in the present study. But we often ignore these conditions in clinics, due to the lack of~~  
15  
16 375 ~~symptoms or clinical findings. Currently, artificial tear emulsion may be an effective way to treat~~  
17  
18 376 ~~the signs and symptoms of DE in meibomian gland dysfunction (MGD) cases<sup>[33]</sup>. On the other hand,~~  
19  
20 377 ~~Barabino S et al<sup>[34]</sup> reported that the combination of hyaluronic acid and tamarind seed~~  
21  
22 378 ~~polysaccharide also could improve the symptoms of DE effectively.~~  
23  
24 379 ~~Even so, the~~Our study ~~had~~ ~~did~~ include some inherent limitations. For example, we did not test  
25  
26 380 tears osmotic pressure in ~~the~~ ~~our~~ diagnostic protocol, and did not directly evaluate the ocular  
27  
28 381 surface or the meibomian glands. ~~This study~~Our protocol also lacked some of the ~~other~~ additional  
29  
30 382 objective tests that can be used to evaluating ~~evaluate the~~ ocular surface. These limitations will be  
31  
32 383 ~~improved~~ addressed in our future studies~~y~~.  
33  
34 384 Our study findings suggested that there ~~were~~ ~~are~~ ~~so~~ many subjects that potentially suffer from DE  
35  
36 385 despite a lack of reported symptomology. ~~– without showing any sign~~ symptoms. The occupations  
37  
38 386 of the population examined in this study ~~are~~ ~~was~~ comprised mainly of farmers, ~~so we should~~ which  
39  
40 387 suggests that ~~pay~~ more attention should be paid to ~~the~~ ~~this~~ special group. ~~In addition~~ Additionally,  
41  
42 388 it is necessary to screen ~~in~~ those outpatients ~~with~~ possessing DE inducing factors, and future  
43  
44 389 interventions should focus on ~~the~~ discrepancy patients demonstrating discrepancies between  
45  
46 390 symptomology and measured clinical findings. Similarly, the Diagnostic Methodology  
47  
48 391 Subcommittee also concluded that the administration of a structured questionnaire to patients

1  
2 392 presenting to ~~a~~the clinic provides an excellent opportunity for screening patients with potential  
3  
4 393 ~~dry eye~~DE disease.<sup>[149]</sup>

5  
6 394 In conclusion, the causes of DE is~~are a multi-stage disease related to multi factors~~multi-factorial,  
7  
8  
9 395 and ~~influencing~~factors that influence the severity of ~~of~~ DE signsymptoms~~symptomology~~ included  
10  
11 396 gender, smoking, environment ~~as well as~~and age. ~~It~~Moving forward, it is of great importance to  
12  
13 397 make the progression of ~~the DE disease~~ clear, to put forward the pre-clinical phase concept and to  
14  
15 398 recogn~~ize~~ise the ~~discrepancy~~discrepancies found in many subjects, all of which may contribute  
16  
17 399 ~~favorably~~favorably to the prevention, diagnosis and treatment of DE.

18  
19  
20  
21 400 There ~~is no financial support and any~~were no conflicts of financial interest for this study.

#### 22 23 401 Acknowledgments

24  
25 402 This work was supported in part by Dr. Lei Liu, Dr. Yizhou Sun, and Dr. Jun Chen of the Department  
26  
27 403 of Ophthalmology, First Hospital of China Medical University.

#### 28 29 30 404 Contributorship statement

31  
32 405 Study concept and design: LC and RH. Acquisition of data: RH and YDH. Analysis and interpretation  
33  
34 406 of data: RH YDH and LC. Drafting of the manuscript: RH and KY. Critical revision of the manuscript  
35  
36 407 for intellectual content: LC. All authors have read and approved of the final manuscript.

#### 37 38 39 408 Competing interests

40  
41 409 There were no conflicts of financial interest for this study.

#### 42 43 44 410 Funding

45  
46 411 This research received no specific grant from any funding agency in the public, commercial or  
47  
48 412 not-for-profit sectors.

#### 49 50 51 413 Data sharing statement

52  
53 414 No additional data are available.

#### 54 55 56 415 Authors' contributions

57  
58 416 ~~Study concept and design: LC and RH. Acquisition of data: RH and YDH. Analysis and interpretation~~

1  
2 417 of data: RH YDH and LC. Drafting of the manuscript: RH and KY. Critical revision of the manuscript  
3  
4 418 for important intellectual content: LC. All authors have read and approved of the final manuscript.  
5

6 419 **Acknowledgments**  
7

8  
9 420 ~~This work was supported in part by Dr. Lei Liu, Dr. Yizhou Sun, and Dr. Jun Chen in the~~  
10  
11 421 ~~investigation follow up in of the Department of Ophthalmology, First Hospital of China Medical~~  
12  
13 422 ~~University.~~  
14

15  
16 423  
17

18 424  
19

20 425  
21

22 426  
23

24 427  
25

26 428  
27

28 429  
29

30 430  
31

32 431 **REFERENCES**  
33

34  
35  
36  
37 432 1. The definition and classification of dry eye disease: report of the Definition and Classification  
38  
39 433 Subcommittee of the International Dry Eye WorkShop (2007). Ocul Surf.2007;5(2):75-92.  
40

41  
42 434 ~~2. Posa A, Sel S, Dietz R, Sander R, Bräuer L, Paulsen F. Updated Incidence of Dry Eye Syndrome in~~  
43  
44 435 ~~Germany. Klin Monbl Augenheilkd. 2014; 231(1):42-46.~~  
45

46 436 ~~3. Lee HS, Ji YS, Yoon KC. Efficacy of Hypotonic 0.18% Sodium Hyaluronate Eye Drops in Patients~~  
47  
48 437 ~~With Dry Eye Disease. Cornea. 2014 Jun 9. [Epub ahead of print]~~  
49

50  
51 438 ~~4. Oleňik A. Effectiveness and tolerability of dietary supplementation with a combination of~~  
52  
53 439 ~~omega 3 polyunsaturated fatty acids and antioxidants in the treatment of dry eye symptoms:~~  
54  
55 440 ~~results of a prospective study. Clin Ophthalmol. 2014; 8:169-176.~~  
56  
57  
58  
59  
60

- 1  
2  
3 441 | [25](#). Bron AJ. Diagnosis of dry eye. *Surv Ophthalmol*. 2001; 45 Suppl 2:S221-226.
- 4 442 | [36](#). Perry HD. Dry eye disease: pathophysiology, classification, and diagnosis. *Am J Manag Care*.
- 5  
6 443 | 2008; 14:S79-87.
- 7  
8  
9 444 | [47](#). Jie Y, Xu L, Wu YY, Jonas JB. Prevalence of dry eye among adult Chinese in the Beijing Eye Study.
- 10  
11 445 | *Eye (Lond)*. 2009; 23:688-693.
- 12  
13  
14 446 | [58](#). Labbé A, Wang YX, Jie Y, Baudouin C, Jonas JB, Xu L. Dry eye disease, dry eye symptoms and
- 15  
16 447 | depression: the Beijing Eye Study. *Br J Ophthalmol*. 2013; 97(11):1399-1403.
- 17  
18  
19 448 | [69](#). Onwubiko SN, Eze BI, Udeh NN, Arinze OC, Onwasigwe EN, Umeh RE. Dry eye disease:
- 20  
21 449 | Prevalence, distribution and determinants in a hospital-based population. *Cont Lens Anterior Eye*.
- 22  
23 450 | 2013; pii: S1367-0484(13)00279-8.
- 24  
25  
26 451 | [710](#). van Landingham SW, West SK, Akpek EK, Muñoz B, Ramulu PY. Impact of dry eye on reading in
- 27  
28 452 | a population based sample of the elderly: the Salisbury Eye Evaluation. *Br J Ophthalmol*. 2013; doi:
- 29  
30 453 | 10.1136/bjophthalmol-2013-303518.
- 31  
32  
33 454 | [811](#). Gulati A, Sullivan R, Buring JE, Sullivan DA, Dana R, Schaumberg DA. Validation and
- 34  
35 455 | repeatability of a short questionnaire for dry eye syndrome. *Am J Ophthalmol*. 2006; 142:125–131.
- 36  
37  
38 456 | [912](#). Uchino M, Nishiwaki Y, Michikawa T, Shirakawa K, Kuwahara E, Yamada M, Dogru M,
- 39  
40 457 | Schaumberg DA, Kawakita T, Takebayashi T, Tsubota K. Prevalence and risk factors of dry eye
- 41  
42 458 | disease in Japan: Koumi study. *Ophthalmology*. 2011; 118:2361-2367.
- 43  
44 459 | [1013](#). Zhang Mei, Chen Jiaqi, Liu Zhuguo. The diagnosis of dry eye syndrome. *Chinese Journal of*
- 45  
46 460 | *Practical Ophthalmology*. 2000; 18: 664-668.
- 47  
48  
49 461 | [114](#). Kaštelan S, Tomić M, Salopek-Rabatić J, Novak B. Diagnostic Procedures and Management of
- 50  
51 462 | Dry Eye. *Biomed Res Int* 2013:309723.
- 52  
53  
54 463 | [125](#). Sweeney DF, Millar TJ, Raju SR. Tear film stability: A review. *Exp Eye Res*. 2013; 117:28-38.
- 55  
56  
57 464 | [136](#). Baudouin C, Aragona P, Messmer EM, Tomlinson A, Calonge M, Boboridis KG, Akova YA,
- 58  
59  
60

- 1  
2  
3 465 Geerling G, Labetoulle M, Rolando M. Role of hyperosmolarity in the pathogenesis and  
4  
5 466 management of dry eye disease: proceedings of the OCEAN group meeting. *Ocul Surf*. 2013;  
6  
7 467 11(4):246-258.
- 9  
10 468 ~~17. Sullivan BD, Crews LA, Sönmez B, de la Paz MF, Comert E, Charoenrook V, de Araujo AL, Pepose~~  
11  
12 469 ~~JS, Berg MS, Kosheleff VP, Lemp MA. Clinical utility of objective tests for dry eye disease: variability~~  
13  
14 470 ~~over time and implications for clinical trials and disease management. *Cornea*.~~  
15  
16 471 ~~2012;31(9):1000-1008.~~
- 17  
18 472 ~~18. Sullivan BD, Whitmer D, Nichols KK, Tomlinson A, Foulks GN, Geerling G, Pepose JS, Kosheleff V,~~  
19  
20 473 ~~Porreco A, Lemp MA. An objective approach to dry eye disease severity. *Invest Ophthalmol Vis Sci*.~~  
21  
22 474 ~~2010;51(12):6125-6130.~~
- 23  
24 475 ~~149. Bron, AJ . Methodologies to diagnose and monitor dry eye disease: report of the Diagnostic~~  
25  
26 476 ~~Methodology Subcommittee of the International Dry Eye WorkShop (2007). 2007; *Ocul Surf*~~  
27  
28 477 ~~5(2):108-152.~~
- 29  
30 478 ~~1520. Nichols KK, Mitchell GL, Zadnik K. The repeatability of clinical measurements of dry eye.~~  
31  
32 479 ~~*Cornea*.2004; 23: 272-285.~~
- 33  
34 480 ~~1624. Schein OD, Tielsch JM, Muñoz B, Bandeen-Roche K, West S. Relation between signs and~~  
35  
36 481 ~~symptoms of dry eye in the elderly. A population-based perspective. *Ophthalmology*.1997;~~  
37  
38 482 ~~104:1395-1401.~~
- 39  
40 483 ~~1722. Chia EM, Mitchell P, Rochtchina E, Lee AJ, Maroun R, Wang JJ. Prevalence and associations of~~  
41  
42 484 ~~dry eye syndrome in an older population: the Blue Mountains Eye Study. *Clin Experiment*~~  
43  
44 485 ~~*Ophthalmol*. 2003; 31:229-232~~
- 45  
46 486 ~~1823. Tamer C, Oksuz H, Sogut S. Androgen status of the nonautoimmune dry eye subtypes.~~  
47  
48 487 ~~*Ophthalmic Res*. 2006; 38:280-286.~~
- 49  
50 488 ~~1924. Peng CC, Cerretani C, Braun RJ, Radke CJ. Evaporation-driven instability of the precorneal tear~~  
51  
52  
53  
54  
55  
56  
57  
58  
59  
60

- 1  
2 489 film. *Adv Colloid Interface Sci.* 2014;206:250-264.
- 3  
4 490 [2025](#). Madden LC, Tomlinson A, Simmons PA. Effect of humidity variations in a controlled  
5  
6 491 environment chamber on tear evaporation after dry eye therapy. *Eye Contact Lens.*  
7  
8 492 2013;39(2):169-174.
- 9  
10  
11 493 [2126](#). López-Miguel A, Tesón M, Martín-Montañez V, Enríquez-de-Salamanca A, Stern ME, Calonge  
12  
13 M, González-García MJ. Dry eye exacerbation in patients exposed to desiccating stress under  
14 494  
15 controlled environmental conditions. *Am J Ophthalmol.* 2014;157(4):788-798.
- 16  
17 495  
18 496 ~~27. Tesón M, González-García MJ, López-Miguel A, Enríquez-de-Salamanca A, Martín-Montañez V,~~  
19  
20 ~~Benito MJ, Mateo ME, Stern ME, Calonge M. Influence of a controlled environment simulating an~~  
21 497  
22 ~~in-flight airplane cabin on dry eye disease. *Invest Ophthalmol Vis Sci.* 2013;54(3):2093-2099.~~  
23 498  
24  
25 499 ~~28. Abusharha AA, Pearce EI. The effect of low humidity on the human tear film. *Cornea.*~~  
26  
27 ~~2013;32(4):429-434.~~  
28 500
- 29  
30  
31 501 [2279](#). Korb DR, Blackie CA. Using goggles to increase periocular humidity and reduce dry eye  
32  
33 502 symptoms. *Eye Contact Lens.* 2013;39(4):273-276.
- 34  
35  
36 503 [23830](#). Sayin N, Kara N, Pekel G, Altinkaynak H. Effects of chronic smoking on central corneal  
37  
38 504 thickness, endothelial cell, and dry eye parameters. *Cutan Ocul Toxicol.* 2013 Oct 22. [Epub ahead of  
39  
40 505 print]
- 41  
42  
43 506 [249](#). Rewri P, Kakkar M. Awareness, knowledge, and practice: a survey of glaucoma in north Indian  
44  
45 rural residents. *Indian J Ophthalmol.* 2014;62(4):482-486.
- 46 507  
47  
48 508 ~~25301~~. Uchino M, Yokoi N, Uchino Y, Dogru M, Kawashima M, Komuro A, Sonomura Y, Kato H,  
49  
50 Kinoshita S, Schaumberg DA, Tsubota K. Prevalence of Dry Eye Disease and its Risk Factors in Visual  
51 509  
52 Display Terminal Users: The Osaka Study. *Am J Ophthalmol.* 2013; 156(4):759-766.
- 53 510  
54  
55 511 [26312](#). Sullivan BD, Crews LA, Messmer EM, Foulks GN, Nichols KK, Baenninger P, Geerling G,  
56  
57 512 Figueiredo F, Lemp MA. Correlations between commonly used objective signs and symptoms for



1  
2 513 the diagnosis of dry eye disease: clinical implications. *Acta Ophthalmol.* 2014;92(2):161-166.

3  
4 514 ~~33. Sindt CW, Foulks GN. Efficacy of an artificial tear emulsion in patients with dry eye associated~~  
5  
6 515 ~~with meibomian gland dysfunction. *Clin Ophthalmol.* 2013; 7:1713-1722.~~

7  
8  
9 516 ~~34. Barabino S, Rolando M, Nardi M, Bonini S, Aragona P, Traverso CE. The effect of an artificial tear~~  
10  
11 517 ~~combining hyaluronic acid and tamarind seeds polysaccharide in patients with moderate dry eye~~  
12  
13 518 ~~syndrome: a new treatment for dry eye. *Eur J Ophthalmol.* 2013; 20;24(2):173-178.~~

14  
15  
16  
17 519 27. Sullivan BD, Whitmer D, Nichols KK, Tomlinson A, Foulks GN, Geerling G, Pepose JS, Kosheleff V,  
18  
19 520 Porreco A, Lemp MA. An objective approach to dry eye disease severity. *Invest Ophthalmol Vis Sci.*  
20  
21 521 2010;51(12):6125-6130.

22 522

23  
24 523

25  
26 524

27  
28 525

29  
30 526

31  
32 527

33  
34 528

35  
36 529

37  
38 530

39  
40 531

41  
42 532

43  
44 533

45  
46 534

47  
48 535

49  
50 536

51  
52  
53  
54  
55  
56  
57  
58  
59 537 **Table 1. Dry eye questionnaire ~~for used in~~ used in this survey.**

1. Do your eyes ever feel dry?
2. Do your eyes ever have tearing?
3. Do your eyes ever feel burning?
4. Do your eyes ever have blurring and fluctuating vision?
5. Do your eyes ever feel irritation?
6. Do your eyes ever feel foreign body sensation?
7. Do your eyes ever feel tired?

Possible answers to the questions were “none or rarely”, “sometimes”, and “often or all the time”. The positive signymptomsymptoms was were defined as having by the answers “sometimes” or “often or all the time”.

556 **Table 2. Reported the result of Discrepancy between DE symptoms signs and clinical**  
 557 **findings.**

|                     | Clinical findings |                      |       |
|---------------------|-------------------|----------------------|-------|
|                     | DE                | <u>Controlnormal</u> | Total |
| DE                  | 1052              | 658                  | 1710  |
| <u>Signsymptoms</u> | 302               | 250                  | 552   |
| Total               | 1354              | 908                  | 2262  |

558 \*The discrepant group contained 960 (302+658, 42.44%) subjects ,which is significant in statistics  
 559 (Pearson Chi-square test:  $\chi^2=4.027$ ,  $p = 0.045 < 0.05$ ). The sensitivity and specificity of DE  
 560 identification based on subject symptoms were 77.70% (1052/1354) and 27.53% (250/908),  
 561 respectively, while the accuracy of using the subjects' perceived symptoms for DE identification  
 562 was 57.56% ((1052+250)/2262). The positive predictive value was 61.52% (1052/1710), while the  
 563 negative predictive value was 45.29% (250/552).

1  
2 576  
3  
4 577  
5  
6 578  
7  
8  
9 579  
10  
11 580  
12  
13 581  
14  
15 582  
16  
17  
18 583  
19  
20 584  
21  
22  
23  
24  
25  
26  
27  
28  
29  
30  
31  
32  
33 585  
34  
35 586  
36  
37  
38 587  
39  
40  
41  
42  
43  
44  
45  
46  
47  
48  
49  
50  
51  
52  
53  
54  
55  
56  
57  
58  
59  
60

**Table 3.** Comparison of Schirmer I test and tear film break up time ~~The p~~Primary outcome variables of tear film BUT and Schirmer scores (Schirmer II) among the ~~three~~subject groups.

| <del>Sign</del> symptoms | Clinical findings | Schirmer II test (mm) | BUT (s)         |
|--------------------------|-------------------|-----------------------|-----------------|
| Normal                   | Normal            | 22.0 (2.0-30.0)       | 12.5 (0.0-30.0) |
| Discrepancy              |                   | 15.0 (0.0-30.0)       | 9.0 (0.0-30.0)  |
| DE                       | DE                | 5.0 (0.0-30.0)        | 4.0 (0.0-20.0)  |

\*There were remarkable differences in the values obtained for Schirmer II testing and tear film BUT among our three study groups (Schirmer II test:  $\chi^2=422.93$ ,  $p<0.0001$ ; BUT:  $\chi^2=264.85$ ,  $p<0.0001$ ).

## STROBE Statement—checklist of items that should be included in reports of observational studies

|                              | Item No | Recommendation                                                                                                                                                                                                                                                                                                                                                                                                                                                                                                                                                                                                                                                                                   |
|------------------------------|---------|--------------------------------------------------------------------------------------------------------------------------------------------------------------------------------------------------------------------------------------------------------------------------------------------------------------------------------------------------------------------------------------------------------------------------------------------------------------------------------------------------------------------------------------------------------------------------------------------------------------------------------------------------------------------------------------------------|
| <b>Title and abstract</b>    | √ 1     | (a) Indicate the study's design with a commonly used term in the title or the abstract<br>(b) Provide in the abstract an informative and balanced summary of what was done and what was found                                                                                                                                                                                                                                                                                                                                                                                                                                                                                                    |
| <b>Introduction</b>          |         |                                                                                                                                                                                                                                                                                                                                                                                                                                                                                                                                                                                                                                                                                                  |
| Background/rationale         | √ 2     | Explain the scientific background and rationale for the investigation being reported                                                                                                                                                                                                                                                                                                                                                                                                                                                                                                                                                                                                             |
| Objectives                   | √ 3     | State specific objectives, including any prespecified hypotheses                                                                                                                                                                                                                                                                                                                                                                                                                                                                                                                                                                                                                                 |
| <b>Methods</b>               |         |                                                                                                                                                                                                                                                                                                                                                                                                                                                                                                                                                                                                                                                                                                  |
| Study design                 | √ 4     | Present key elements of study design early in the paper                                                                                                                                                                                                                                                                                                                                                                                                                                                                                                                                                                                                                                          |
| Setting                      | √ 5     | Describe the setting, locations, and relevant dates, including periods of recruitment, exposure, follow-up, and data collection                                                                                                                                                                                                                                                                                                                                                                                                                                                                                                                                                                  |
| Participants                 | √ 6     | (a) <i>Cohort study</i> —Give the eligibility criteria, and the sources and methods of selection of participants. Describe methods of follow-up<br><i>Case-control study</i> —Give the eligibility criteria, and the sources and methods of case ascertainment and control selection. Give the rationale for the choice of cases and controls<br><i>Cross-sectional study</i> —Give the eligibility criteria, and the sources and methods of selection of participants<br>(b) <i>Cohort study</i> —For matched studies, give matching criteria and number of exposed and unexposed<br><i>Case-control study</i> —For matched studies, give matching criteria and the number of controls per case |
| Variables                    | √ 7     | Clearly define all outcomes, exposures, predictors, potential confounders, and effect modifiers. Give diagnostic criteria, if applicable                                                                                                                                                                                                                                                                                                                                                                                                                                                                                                                                                         |
| Data sources/<br>measurement | √ 8*    | For each variable of interest, give sources of data and details of methods of assessment (measurement). Describe comparability of assessment methods if there is more than one group                                                                                                                                                                                                                                                                                                                                                                                                                                                                                                             |
| Bias                         | √ 9     | Describe any efforts to address potential sources of bias                                                                                                                                                                                                                                                                                                                                                                                                                                                                                                                                                                                                                                        |
| Study size                   | √ 10    | Explain how the study size was arrived at                                                                                                                                                                                                                                                                                                                                                                                                                                                                                                                                                                                                                                                        |
| Quantitative variables       | √ 11    | Explain how quantitative variables were handled in the analyses. If applicable, describe which groupings were chosen and why                                                                                                                                                                                                                                                                                                                                                                                                                                                                                                                                                                     |
| Statistical methods          | √ 12    | (a) Describe all statistical methods, including those used to control for confounding<br>(b) Describe any methods used to examine subgroups and interactions<br>(c) Explain how missing data were addressed<br>(d) <i>Cohort study</i> —If applicable, explain how loss to follow-up was addressed<br><i>Case-control study</i> —If applicable, explain how matching of cases and controls was addressed<br><i>Cross-sectional study</i> —If applicable, describe analytical methods taking account of sampling strategy<br>(e) Describe any sensitivity analyses                                                                                                                                |

Continued on next page

| <b>Results</b>           |          |                                                                                                                                                                                                                                                                                                                                                                                                                           |
|--------------------------|----------|---------------------------------------------------------------------------------------------------------------------------------------------------------------------------------------------------------------------------------------------------------------------------------------------------------------------------------------------------------------------------------------------------------------------------|
| Participants             | √<br>13* | (a) Report numbers of individuals at each stage of study—eg numbers potentially eligible, examined for eligibility, confirmed eligible, included in the study, completing follow-up, and analysed<br><hr/> (b) Give reasons for non-participation at each stage<br><hr/> (c) Consider use of a flow diagram                                                                                                               |
| Descriptive data         | √<br>14* | (a) Give characteristics of study participants (eg demographic, clinical, social) and information on exposures and potential confounders<br><hr/> (b) Indicate number of participants with missing data for each variable of interest<br><hr/> (c) <i>Cohort study</i> —Summarise follow-up time (eg, average and total amount)                                                                                           |
| Outcome data             | √<br>15* | <i>Cohort study</i> —Report numbers of outcome events or summary measures over time<br><hr/> <i>Case-control study</i> —Report numbers in each exposure category, or summary measures of exposure<br><hr/> <i>Cross-sectional study</i> —Report numbers of outcome events or summary measures                                                                                                                             |
| Main results             | √<br>16  | (a) Give unadjusted estimates and, if applicable, confounder-adjusted estimates and their precision (eg, 95% confidence interval). Make clear which confounders were adjusted for and why they were included<br><hr/> (b) Report category boundaries when continuous variables were categorized<br><hr/> (c) If relevant, consider translating estimates of relative risk into absolute risk for a meaningful time period |
| Other analyses           | √<br>17  | Report other analyses done—eg analyses of subgroups and interactions, and sensitivity analyses                                                                                                                                                                                                                                                                                                                            |
| <b>Discussion</b>        |          |                                                                                                                                                                                                                                                                                                                                                                                                                           |
| Key results              | √<br>18  | Summarise key results with reference to study objectives                                                                                                                                                                                                                                                                                                                                                                  |
| Limitations              | √<br>19  | Discuss limitations of the study, taking into account sources of potential bias or imprecision. Discuss both direction and magnitude of any potential bias                                                                                                                                                                                                                                                                |
| Interpretation           | √<br>20  | Give a cautious overall interpretation of results considering objectives, limitations, multiplicity of analyses, results from similar studies, and other relevant evidence                                                                                                                                                                                                                                                |
| Generalisability         | √<br>21  | Discuss the generalisability (external validity) of the study results                                                                                                                                                                                                                                                                                                                                                     |
| <b>Other information</b> |          |                                                                                                                                                                                                                                                                                                                                                                                                                           |
| Funding                  | √<br>22  | Give the source of funding and the role of the funders for the present study and, if applicable, for the original study on which the present article is based                                                                                                                                                                                                                                                             |

\*Give information separately for cases and controls in case-control studies and, if applicable, for exposed and unexposed groups in cohort and cross-sectional studies.

**Note:** An Explanation and Elaboration article discusses each checklist item and gives methodological background and published examples of transparent reporting. The STROBE checklist is best used in conjunction with this article (freely available on the Web sites of PLoS Medicine at <http://www.plosmedicine.org/>, Annals of Internal Medicine at <http://www.annals.org/>, and Epidemiology at <http://www.epidem.com/>). Information on the STROBE Initiative is available at [www.strobe-statement.org](http://www.strobe-statement.org).
